# Supplementary material for: Asymmetric synthesis of chiral tricyclic 3,4-dihydropyrimidin-2-thione derivatives catalyzed by chiral imidodiphosphoric acid
Source: Royal Society of Chemistry journal article supplement (doi:10.1039/d4nj03039g), 2024-01-01

## Supporting Information

Lingkai Kong, Peng Wang, Chunzhi Ju, Guangliang Zhang\* and Suoqin Zhang\*

*College of Chemistry, Jilin University, 2699 Qianjin Street, Changchun 130012, People's Republic of China.*

*Fax: (+86)-431-8515-5252;  
phone: (+86)-431-8515-5252;  
e-mail: suoqin@jlu.edu.cn.*

### Content

|                                                            |   |
|------------------------------------------------------------|---|
| 1. General Experimental Information .....                  | 2 |
| 2. Experimental Procedures and Characterization Data ..... | 2 |
| 3. Copies of HPLC spectra. ....                            | 2 |
| 4. Copies of NMR spectra. ....                             | 2 |

# 1. General Experimental Information

All reagents were used without purification. All solvents were purified and dried according to standard methods. The reaction products were purified by flash column chromatography on 200–300 mesh silica gel. Optical rotations were measured with a Jasco-P-2000 digital polarimeter at 25 °C and concentrations (*c*) are given in g (100 mL)<sup>-1</sup>. <sup>1</sup>H and <sup>13</sup>C NMR spectra were recorded with Bruker 400 MHz spectrometers (400 MHz for <sup>1</sup>H NMR, 101 MHz for <sup>13</sup>C NMR); chemical shifts ( $\delta$ ), multiplicity (s = singlet, d = doublet, t = triplet, m = multiplet, td = triplet of doublet, dt = doublet of triplet, dd = doublet of doublet), coupling constants (Hz), and integration. Enantiomeric excess values were measured by analytical HPLC with Daicel ChiralPak AD-H, Daicel ChiralPak AS-H or Daicel Chiralcel OD-H columns.

# 2. Experimental Procedures and Characterization Data

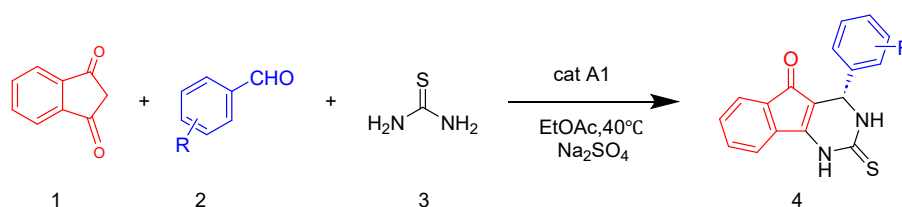

**General Procedure for the Organocatalytic Biginelli Reaction:** A solution of aldehyde (0.2 mmol), thiourea (0.2 mmol), and catalyst (10 mol%, 0.01 mmol) and Na<sub>2</sub>SO<sub>4</sub> (200 mg) in EtOAc (2.0 mL) was stirred at 25 °C for 2 h, then 1,3-indanedione (0.1 mmol) was added. The reaction mixture was stirred at 40 °C for 48 h (reaction progress monitored by TLC). EtOAc and silica gel were added and, after removal of the solvent, the residue was purified by flash column chromatography on silica gel to afford the pure products.

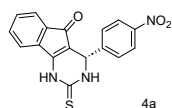

*(S)*-4-(4-nitrophenyl)-2-thioxo-1,2,3,4-tetrahydro-5H-indeno[1,2-d]pyrimidin-5-one (**4a**)

The crude product was purified by flash column chromatography (DCM/EA = 40/1) on silicagel. Red solid, 65% yield (21.93 mg),  $[\alpha]_D^{25} = -1070$  (*c* = 0.10, EtOH), 96% ee [Daicel Chiralcel OJ-H column, *n*-hexane/EtOH = 50 / 50, 1.0 ml/min,  $\lambda = 254$  nm, *t*(major) = 28.5 min, *t*(minor) = 16.1 min]; <sup>1</sup>H NMR (400 MHz, DMSO-*d*<sub>6</sub>)  $\delta$  11.92 (s, 1H), 10.01 (s, 1H), 8.25 (d, *J* = 8.8 Hz, 2H), 7.84 (d, *J* = 7.2 Hz, 1H), 7.60 (d, *J* = 8.8 Hz, 2H), 7.46 (t, *J* = 8.0 Hz, 1H), 7.38 (t, *J* = 7.3 Hz, 1H), 7.33 (d, *J* = 6.9 Hz, 1H), 5.56 (s, 1H). <sup>13</sup>C NMR (101 MHz, DMSO)  $\delta$  189.33, 175.81, 153.16, 149.54, 147.56, 135.70, 133.26, 132.82, 131.39, 128.67, 124.42, 121.80, 121.27, 104.79, 53.58. HRMS (ESI) *m/z* calcd for C<sub>17</sub>H<sub>12</sub>N<sub>3</sub>O<sub>3</sub>S ([M+H]<sup>+</sup>): 338.0594, found: 338.0595.

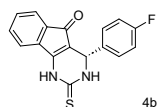

*(S)*-4-(4-fluorophenyl)-2-thioxo-1,2,3,4-tetrahydro-5H-indeno[1,2-d]pyrimidin-5-one (**4b**)

The crude product was purified by flash column chromatography (DCM/EA = 40/1) on silicagel. Red solid, 51% yield (15.80 mg),  $[\alpha]_D^{25} = -980$  (c = 0.10, EtOH), 92% ee [Daicel Chiralcel AD column, *n*-hexane/ *i*-PrOH = 85 / 35, 1.0 ml/min,  $\lambda = 254$  nm, t(major)= 10.9 min, t(minor) = 6.6 min]; **<sup>1</sup>H NMR (400 MHz, DMSO-*d*<sub>6</sub>)**  $\delta$  11.81 (s, 1H), 9.91 (s, 1H), 7.83 (d, *J* = 7.2 Hz, 1H), 7.46 (t, *J* = 7.9 Hz, 1H), 7.42 – 7.27 (m, 4H), 7.20 (t, *J* = 8.8 Hz, 2H), 5.39 (s, 1H). **<sup>13</sup>C NMR (101 MHz, DMSO-*d*<sub>6</sub>)**  $\delta$  189.51 , 175.37 , 152.89 , 138.97 , 135.84 , 133.31 , 132.75 , 131.22 , 129.40 , 129.32 , 121.71 , 121.11 , 116.01 , 115.79 , 105.72 , 79.64 , 53.39 . HRMS (ESI) *m/z* calcd for C<sub>17</sub>H<sub>12</sub>FN<sub>2</sub>OS ([M+H]<sup>+</sup>): 311.0649, found: 311.0644.

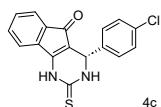

*(S)*-4-(4-chlorophenyl)-2-thioxo-1,2,3,4-tetrahydro-5H-indeno[1,2-d]pyrimidin-5-one (**4c**)

The crude product was purified by flash column chromatography (DCM/EA = 40/1) on silicagel. Red solid, 67% yield (21.90 mg),  $[\alpha]_D^{25} = -1170$  (c = 0.10, EtOH), 94 % ee [Daicel Chiralcel AD column, *n*-hexane/ *i*-PrOH = 80 / 20, 1.0 ml/min,  $\lambda = 254$  nm, t(major)= 16.8 min, t(minor) = 9.1 min]; **<sup>1</sup>H NMR (400 MHz, DMSO-*d*<sub>6</sub>)**  $\delta$  11.83 (s, 1H), 9.92 (s, 1H), 7.83 (d, *J* = 7.2 Hz, 1H), 7.44 (d, *J* = 8.5 Hz, 3H), 7.40 – 7.30 (m, 4H), 5.39 (s, 1H). **<sup>13</sup>C NMR (101 MHz, DMSO-*d*<sub>6</sub>)**  $\delta$  189.46 , 175.50 , 152.95 , 141.60 , 135.80 , 133.30 , 132.98 , 132.75 , 131.25 , 129.18 , 129.10 , 121.72 , 121.13 , 105.47 , 53.46 . HRMS (ESI) *m/z* calcd for C<sub>17</sub>H<sub>12</sub>ClN<sub>2</sub>OS ([M+H]<sup>+</sup>): 327.0353, found: 327.0349.

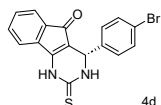

*(S)*-4-(4-bromophenyl)-2-thioxo-1,2,3,4-tetrahydro-5H-indeno[1,2-d]pyrimidin-5-one (**4d**)

The crude product was purified by flash column chromatography (DCM/EA = 40/1) on silicagel. Red solid, 49% yield (18.20 mg),  $[\alpha]_D^{25} = -1060$  (c = 0.10, EtOH), 92% ee [Daicel Chiralcel AD column, *n*-hexane/ *i*-PrOH = 80 / 20, 1.0 ml/min,  $\lambda = 254$  nm, t(major)= 18.2 min, t(minor) = 9.8 min]; **<sup>1</sup>H NMR (400 MHz, DMSO-*d*<sub>6</sub>)**  $\delta$  11.83 (s, 1H), 9.92 (s, 1H), 7.82 (d, *J* = 7.2 Hz, 1H), 7.57 (d, *J* = 8.4 Hz, 2H), 7.45 (t, *J* = 8.0 Hz, 1H), 7.40 – 7.25 (m, 4H), 5.38 (s, 1H). **<sup>13</sup>C NMR (101 MHz, DMSO-*d*<sub>6</sub>)**  $\delta$  189.46 , 175.48 , 152.95 , 142.01 , 135.79 , 133.29 , 132.76 , 132.03 , 131.27 , 129.52 , 121.74 , 121.55 , 121.14 , 105.40 , 53.53 . HRMS (ESI) *m/z* calcd for C<sub>17</sub>H<sub>12</sub>BrN<sub>2</sub>OS ([M+H]<sup>+</sup>): 370.9848, found: 370.9850.

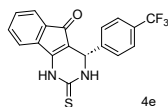

*(S)*-2-thioxo-4-(4-(trifluoromethyl)phenyl)-1,2,3,4-tetrahydro-5H-indeno[1,2-d]pyrimidin-5-one (**4e**)

The crude product was purified by flash column chromatography (DCM/EA = 40/1) on silicagel. Red solid, 31% yield (11.30 mg),  $[\alpha]_D^{25} = -960$  (c = 0.10, EtOH), 90% ee [Daicel Chiralcel AD column, *n*-hexane/ *i*-PrOH = 85 / 35, 1.0 ml/min,  $\lambda = 254$  nm, t(major)= 5.4 min, t(minor) = 8.3 min]; **<sup>1</sup>H NMR (400 MHz, DMSO-*d*<sub>6</sub>)**  $\delta$  11.89 (s, 1H), 9.98 (s, 1H), 7.83 (d, *J* = 7.2 Hz, 1H), 7.76 (d, *J* = 8.2 Hz, 2H), 7.55 (d, *J* = 8.1 Hz, 2H), 7.45 (t, *J* = 6.9 Hz, 1H), 7.41 – 7.29 (m, 2H), 5.51 (s, 1H). **<sup>13</sup>C NMR (101 MHz, DMSO-*d*<sub>6</sub>)**  $\delta$  189.41 , 175.72 , 153.07 , 147.01 , 135.74 , 133.27 , 132.76 , 131.30 , 128.17 , 126.13 ,

121.75 , 121.20 , 105.15 , 53.73 . HRMS (ESI) m/z calcd for C<sub>18</sub>H<sub>12</sub>F<sub>3</sub>N<sub>2</sub>OS ([M+H]<sup>+</sup>): 361.0617, found: 361.0620.

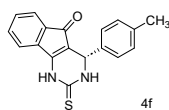

*(S)*-2-thioxo-4-(*p*-tolyl)-1,2,3,4-tetrahydro-5H-indeno[1,2-*d*]pyrimidin-5-one (**4f**)

The crude product was purified by flash column chromatography (DCM/EA = 40/1) on silicagel. Red solid, 71% yield (21.70 mg),  $[\alpha]_D^{25} = -1190$  (c = 0.10, EtOH), 89% ee [Daicel Chiralcel AD column, *n*-hexane/ *i*-PrOH = 80 / 20, 1.0 ml/min,  $\lambda = 254$  nm, t(major)= 17.0 min, t(minor) = 10.5 min]; **<sup>1</sup>H NMR (400 MHz, DMSO-*d*<sub>6</sub>)**  $\delta$  11.77 (s, 1H), 9.89 (s, 1H), 7.82 (d, *J* = 7.2 Hz, 1H), 7.45 (t, *J* = 7.5 Hz, 1H), 7.40 – 7.30 (m, 2H), 7.18 (s, 4H), 5.31 (d, *J* = 2.4 Hz, 1H), 2.28 (s, 3H). **<sup>13</sup>C NMR (101 MHz, DMSO)**  $\delta$  189.56, 175.31, 152.76, 139.88, 137.70, 135.92, 133.36, 132.72, 131.16, 129.81, 129.64, 127.13, 121.67, 121.01, 106.11, 53.81, 21.17. HRMS (ESI) m/z calcd for C<sub>18</sub>H<sub>15</sub>N<sub>2</sub>OS ([M+H]<sup>+</sup>): 307.0900, found: 307.0898.

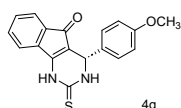

*(S)*-4-(4-methoxyphenyl)-2-thioxo-1,2,3,4-tetrahydro-5H-indeno[1,2-*d*]pyrimidin-5-one (**4g**)

The crude product was purified by flash column chromatography (DCM/EA = 40/1) on silicagel. Red solid, 75% yield (24.00 mg),  $[\alpha]_D^{25} = -910$  (c = 0.10, EtOH), 80% ee [Daicel Chiralcel AD column, *n*-hexane/ *i*-PrOH = 85 / 35, 1.0 ml/min,  $\lambda = 254$  nm, t(major)= 17.2 min, t(minor) = 8.9 min]; **<sup>1</sup>H NMR (400 MHz, DMSO-*d*<sub>6</sub>)**  $\delta$  11.74 (s, 1H), 9.85 (s, 1H), 7.82 (d, *J* = 7.2 Hz, 1H), 7.44 (t, *J* = 8.0 Hz, 1H), 7.38 – 7.28 (m, 2H), 7.21 (d, *J* = 8.7 Hz, 2H), 6.92 (d, *J* = 8.7 Hz, 2H), 5.29 (s, 1H), 3.72 (s, 3H). **<sup>13</sup>C NMR (101 MHz, DMSO-*d*<sub>6</sub>)**  $\delta$  189.59 , 175.12 , 159.44 , 152.70 , 135.93 , 134.90 , 133.36 , 132.69 , 131.11 , 128.49 , 121.63 , 120.99 , 114.46 , 106.18 , 79.64 , 55.62 , 53.53 . HRMS (ESI) m/z calcd for C<sub>18</sub>H<sub>15</sub>N<sub>2</sub>O<sub>2</sub>S ([M+H]<sup>+</sup>): 323.0849, found: 323.0847.

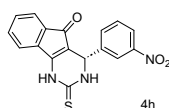

*(S)*-4-(3-nitrophenyl)-2-thioxo-1,2,3,4-tetrahydro-5H-indeno[1,2-*d*]pyrimidin-5-one (**4h**)

The crude product was purified by flash column chromatography (DCM/EA = 40/1) on silicagel. Red solid, 85% yield (28.60 mg),  $[\alpha]_D^{25} = -990$  (c = 0.10, EtOH), 97% ee [Daicel Chiralcel OJ-H column, *n*-hexane/ EtOH = 50 / 50, 1.0 ml/min,  $\lambda = 254$  nm, t(major)= 19.4 min, t(minor) = 14.8 min]; **<sup>1</sup>H NMR (400 MHz, DMSO-*d*<sub>6</sub>)**  $\delta$  11.94 (s, 1H), 10.03 (s, 1H), 8.19 (d, *J* = 7.4 Hz, 2H), 7.83 (dd, *J* = 16.7, 7.4 Hz, 2H), 7.70 (t, *J* = 7.9 Hz, 1H), 7.51 – 7.31 (m, 3H), 5.64 (s, 1H). **<sup>13</sup>C NMR (101 MHz, DMSO)**  $\delta$  189.44, 175.79, 153.26, 148.31, 144.60, 135.70, 134.04, 133.25, 132.83, 131.39, 130.87, 123.40, 122.02, 121.83, 121.28, 104.79, 53.44. HRMS (ESI) m/z calcd for C<sub>17</sub>H<sub>12</sub>N<sub>3</sub>O<sub>3</sub>S ([M+H]<sup>+</sup>): 338.0594, found: 338.0591.

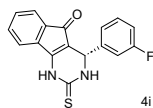

*(S)*-4-(3-fluorophenyl)-2-thioxo-1,2,3,4-tetrahydro-5H-indeno[1,2-*d*]pyrimidin-5-one (**4i**)

The crude product was purified by flash column chromatography (DCM/EA = 40/1) on silicagel. Red solid, 88% yield (27.30 mg),  $[\alpha]_D^{25} = -980$  (c = 0.10, EtOH), 91%ee [Daicel Chiralcel AD column, *n*-hexane/ *i*-PrOH = 80 / 20, 1.0 ml/min,  $\lambda = 254$  nm, t(major)= 14.2 min, t(minor) = 9.6 min]; **<sup>1</sup>H NMR (400 MHz, DMSO-*d*<sub>6</sub>)**  $\delta$  11.83 (s, 1H), 9.94 (s, 1H), 7.82 (d, *J* = 7.2 Hz, 1H), 7.39 (ddt, *J* = 33.3, 15.0, 6.9 Hz, 4H), 7.14 (dd, *J* = 13.4, 8.6 Hz, 3H), 5.42 (s, 1H). **<sup>13</sup>C NMR (101 MHz, DMSO)**  $\delta$  189.47, 175.65, 163.84, 161.41, 153.05, 145.41, 135.79, 133.30, 132.74, 131.27, 123.21, 121.74, 121.16, 115.30, 113.94, 105.32, 53.54. HRMS (ESI) *m/z* calcd for C<sub>17</sub>H<sub>12</sub>FN<sub>2</sub>OS ([M+H]<sup>+</sup>): 311.0649, found: 311.0652.

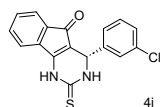

*(S)*-4-(3-chlorophenyl)-2-thioxo-1,2,3,4-tetrahydro-5H-indeno[1,2-*d*]pyrimidin-5-one (**4j**)

The crude product was purified by flash column chromatography (DCM/EA = 40/1) on silicagel. Red solid, 74% yield (24.30 mg),  $[\alpha]_D^{25} = -1090$  (c = 0.10, EtOH), 94%ee [Daicel Chiralcel AD column, *n*-hexane/ *i*-PrOH = 80 / 20, 1.0 ml/min,  $\lambda = 254$  nm, t(major)= 13.8 min, t(minor) = 9.3 min]; **<sup>1</sup>H NMR (400 MHz, DMSO-*d*<sub>6</sub>)**  $\delta$  11.80 (s, 1H), 9.81 (s, 1H), 7.84 (d, *J* = 7.2 Hz, 1H), 7.49 – 7.42 (m, 2H), 7.41 – 7.32 (m, 4H), 7.28 (d, *J* = 6.9 Hz, 1H), 5.73 (s, 1H). **<sup>13</sup>C NMR (101 MHz, DMSO)**  $\delta$  189.14, 175.59, 153.25, 139.09, 135.84, 133.35, 132.67, 132.60, 131.24, 130.32, 130.26, 128.11, 121.59, 121.10, 104.67, 52.61. HRMS (ESI) *m/z* calcd for C<sub>17</sub>H<sub>12</sub>ClN<sub>2</sub>OS ([M+H]<sup>+</sup>): 327.0353, found: 327.0350.

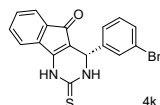

*(S)*-4-(3-bromophenyl)-2-thioxo-1,2,3,4-tetrahydro-5H-indeno[1,2-*d*]pyrimidin-5-one (**4k**)

The crude product was purified by flash column chromatography (DCM/EA = 40/1) on silicagel. Red solid, 70% yield (25.90 mg),  $[\alpha]_D^{25} = -1200$  (c = 0.10, EtOH), 94%ee [Daicel Chiralcel AD column, *n*-hexane/ *i*-PrOH = 80 / 20, 1.0 ml/min,  $\lambda = 254$  nm, t(major)= 14.9 min, t(minor) = 9.5 min]; **<sup>1</sup>H NMR (400 MHz, DMSO-*d*<sub>6</sub>)**  $\delta$  11.85 (s, 1H), 9.93 (s, 1H), 7.82 (d, *J* = 7.2 Hz, 1H), 7.52 – 7.43 (m, 3H), 7.41 – 7.29 (m, 4H), 5.41 (s, 1H). **<sup>13</sup>C NMR (101 MHz, DMSO)**  $\delta$  189.46, 175.59, 153.08, 145.21, 135.77, 133.28, 132.78, 131.45, 131.30, 131.27, 130.05, 126.33, 122.22, 121.78, 121.19, 105.20, 53.51. HRMS (ESI) *m/z* calcd for C<sub>17</sub>H<sub>12</sub>BrN<sub>2</sub>OS ([M+H]<sup>+</sup>): 370.9848, found: 370.9846.

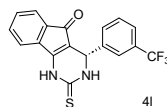

*(S)*-2-thioxo-4-(3-(trifluoromethyl)phenyl)-1,2,3,4-tetrahydro-5H-indeno[1,2-*d*]pyrimidin-5-one (**4l**)

The crude product was purified by flash column chromatography (DCM/EA = 40/1) on silicagel. Red solid, 44% yield (15.80 mg),  $[\alpha]_D^{25} = -1150$  (c = 0.10, EtOH), 96%ee [Daicel Chiralcel AD column, *n*-hexane/ *i*-PrOH = 80 / 20, 1.0 ml/min,  $\lambda = 254$  nm, t(major)= 10.2 min, t(minor) = 6.8 min]; **<sup>1</sup>H NMR (400 MHz, DMSO-*d*<sub>6</sub>)**  $\delta$  11.86 (s, 1H), 9.95 (s, 1H), 7.83 (d, *J* = 7.2 Hz, 1H), 7.77 – 7.57 (m, 4H), 7.52 – 7.29 (m, 3H), 5.55 (s, 1H). **<sup>13</sup>C NMR (101 MHz, DMSO)**  $\delta$  189.46, 175.77, 153.15, 143.88, 135.75, 133.28, 132.76, 131.37, 131.29, 130.40, 125.19, 123.99, 121.77, 121.21, 105.07, 53.69. HRMS (ESI)

m/z calcd for C<sub>18</sub>H<sub>12</sub>F<sub>3</sub>N<sub>2</sub>OS ([M+H]<sup>+</sup>): 361.0617, found: 361.0620.

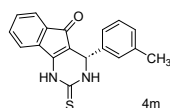

*(S)*-2-thioxo-4-(*m*-tolyl)-1,2,3,4-tetrahydro-5H-indeno[1,2-*d*]pyrimidin-5-one (**4m**)

The crude product was purified by flash column chromatography (DCM/EA = 40/1) on silicagel. Red solid, 78% yield (23.80 mg),  $[\alpha]_D^{25} = -1150$  (c = 0.10, EtOH), 91%ee [Daicel Chiralcel AD column, *n*-hexane/ *i*-PrOH = 80 / 20, 1.0 ml/min,  $\lambda = 254$  nm, t(major) = 14.7 min, t(minor) = 9.8 min]; **<sup>1</sup>H NMR (400 MHz, DMSO-*d*<sub>6</sub>)**  $\delta$  11.76 (s, 1H), 9.87 (s, 1H), 7.82 (d, *J* = 7.2 Hz, 1H), 7.45 (t, *J* = 7.4 Hz, 1H), 7.40 – 7.22 (m, 3H), 7.18 – 7.03 (m, 3H), 5.31 (s, 1H), 2.29 (s, 3H). **<sup>13</sup>C NMR (101 MHz, DMSO)**  $\delta$  189.53, 175.37, 152.79, 142.73, 138.26, 135.88, 133.35, 132.73, 131.18, 129.05, 127.65, 124.38, 121.70, 121.03, 105.98, 54.08, 21.54. HRMS (ESI) m/z calcd for C<sub>18</sub>H<sub>15</sub>N<sub>2</sub>OS ([M+H]<sup>+</sup>): 307.0900, found: 307.0897.

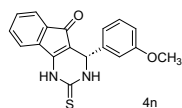

*(S)*-2-thioxo-4-(3-methoxyphenyl)-1,2,3,4-tetrahydro-5H-indeno[1,2-*d*]pyrimidin-5-one (**4n**)

The crude product was purified by flash column chromatography (DCM/EA = 40/1) on silicagel. Red solid, 81% yield (26.10 mg),  $[\alpha]_D^{25} = -1160$  (c = 0.10, EtOH), 99%ee [Daicel Chiralcel AD column, *n*-hexane/ *i*-PrOH = 80 / 20, 1.0 ml/min,  $\lambda = 254$  nm, t(major) = 20.8 min, t(minor) = 13.4 min]; **<sup>1</sup>H NMR (400 MHz, DMSO-*d*<sub>6</sub>)**  $\delta$  11.79 (s, 1H), 9.91 (s, 1H), 7.82 (d, *J* = 7.2 Hz, 1H), 7.52 – 7.25 (m, 4H), 6.96 – 6.74 (m, 3H), 5.34 (s, 1H), 3.75 (s, 3H). **<sup>13</sup>C NMR (101 MHz, DMSO)**  $\delta$  189.52, 175.56, 159.83, 152.87, 144.25, 135.83, 133.33, 132.75, 131.21, 130.35, 121.73, 121.05, 119.04, 113.36, 113.21, 105.85, 55.56, 53.83. HRMS (ESI) m/z calcd for C<sub>18</sub>H<sub>15</sub>N<sub>2</sub>O<sub>2</sub>S ([M+H]<sup>+</sup>): 323.0849, found: 323.0844.

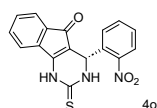

*(S)*-4-(2-nitrophenyl)-2-thioxo-1,2,3,4-tetrahydro-5H-indeno[1,2-*d*]pyrimidin-5-one (**4o**)

The crude product was purified by flash column chromatography (DCM/EA = 40/1) on silicagel. Red solid, 43% yield (14.30 mg),  $[\alpha]_D^{25} = -970$  (c = 0.10, EtOH), 91%ee [Daicel Chiralcel OJ-H column, *n*-hexane/ EtOH = 50 / 50, 1.0 ml/min,  $\lambda = 254$  nm, t(major) = 28.5 min, t(minor) = 16.1 min]; **<sup>1</sup>H NMR (400 MHz, DMSO-*d*<sub>6</sub>)**  $\delta$  11.90 (s, 1H), 9.85 (s, 1H), 7.99 (d, *J* = 8.3 Hz, 1H), 7.84 (d, *J* = 7.2 Hz, 1H), 7.76 (t, *J* = 7.6 Hz, 1H), 7.58 (t, *J* = 7.5 Hz, 2H), 7.42 (dt, *J* = 34.2, 7.5 Hz, 2H), 7.29 (d, *J* = 7.0 Hz, 1H), 6.21 (s, 1H). **<sup>13</sup>C NMR (101 MHz, DMSO)**  $\delta$  189.10, 175.68, 153.17, 148.21, 136.30, 135.72, 134.53, 133.23, 132.77, 131.36, 130.96, 129.86, 125.14, 121.72, 121.25, 104.49, 49.68. HRMS (ESI) m/z calcd for C<sub>17</sub>H<sub>12</sub>N<sub>3</sub>O<sub>3</sub>S ([M+H]<sup>+</sup>): 338.0594, found: 338.0588.

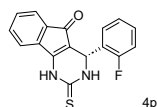

*(S)*-4-(2-fluorophenyl)-2-thioxo-1,2,3,4-tetrahydro-5H-indeno[1,2-*d*]pyrimidin-5-one (**4p**)

The crude product was purified by flash column chromatography (DCM/EA = 40/1) on silicagel. Red

solid, 78% yield (24.30 mg),  $[\alpha]_D^{25} = -960$  (c = 0.10, EtOH), 96% ee [Daicel Chiralcel AD column, *n*-hexane/ *i*-PrOH = 80 / 20, 1.0 ml/min,  $\lambda = 254$  nm, t(major) = 19.6 min, t(minor) = 10.2 min]; **<sup>1</sup>H NMR (400 MHz, DMSO-*d*<sub>6</sub>)**  $\delta$  11.80 (s, 1H), 9.84 (s, 1H), 7.84 (d, *J* = 7.2 Hz, 1H), 7.46 (t, *J* = 7.4 Hz, 1H), 7.42 – 7.27 (m, 4H), 7.19 (q, *J* = 8.7, 7.8 Hz, 2H), 5.55 (s, 1H). **<sup>13</sup>C NMR (101 MHz, DMSO)**  $\delta$  189.21, 175.59, 159.22, 153.03, 135.85, 133.35, 132.69, 131.22, 130.71, 130.62, 130.31, 129.43, 129.30, 125.17, 121.63, 121.09, 116.33, 116.12, 104.71, 49.25, 40.64, 40.43, 40.22, 40.01, 39.80, 39.60, 39.39, 21.52. HRMS (ESI) *m/z* calcd for C<sub>17</sub>H<sub>12</sub>FN<sub>2</sub>OS ([M+H]<sup>+</sup>): 311.0649, found: 311.0641.

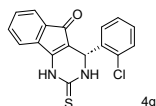

*(S)*-4-(2-chlorophenyl)-2-thioxo-1,2,3,4-tetrahydro-5H-indeno[1,2-d]pyrimidin-5-one (**4q**)

The crude product was purified by flash column chromatography (DCM/EA = 40/1) on silicagel. Red

solid, 71% yield (23.20 mg),  $[\alpha]_D^{25} = -1100$  (c = 0.10, EtOH), 98% ee [Daicel Chiralcel AD column, *n*-hexane/ *i*-PrOH = 80 / 20, 1.0 ml/min,  $\lambda = 254$  nm, t(major) = 16.2 min, t(minor) = 10.6 min]; **<sup>1</sup>H NMR (400 MHz, DMSO-*d*<sub>6</sub>)**  $\delta$  11.81 (s, 1H), 9.82 (s, 1H), 7.84 (d, *J* = 7.2 Hz, 1H), 7.49 – 7.42 (m, 2H), 7.40 – 7.32 (m, 4H), 7.28 (d, *J* = 6.9 Hz, 1H), 5.73 (s, 1H). **<sup>13</sup>C NMR (101 MHz, DMSO)**  $\delta$  189.14, 175.58, 153.25, 139.08, 135.83, 133.34, 132.68, 132.60, 131.25, 130.32, 130.26, 128.11, 121.59, 121.11, 104.66, 52.61. HRMS (ESI) *m/z* calcd for C<sub>17</sub>H<sub>12</sub>ClN<sub>2</sub>OS ([M+H]<sup>+</sup>): 327.0353, found: 327.0359.

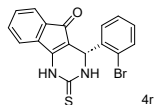

*(S)*-4-(2-bromophenyl)-2-thioxo-1,2,3,4-tetrahydro-5H-indeno[1,2-d]pyrimidin-5-one (**4r**)

The crude product was purified by flash column chromatography (DCM/EA = 40/1) on silicagel. Red

solid, 67% yield (24.80 mg),  $[\alpha]_D^{25} = -1020$  (c = 0.10, EtOH), 96% ee [Daicel Chiralcel AD column, *n*-hexane/ *i*-PrOH = 80 / 20, 1.0 ml/min,  $\lambda = 254$  nm, t(major) = 16.2 min, t(minor) = 10.9 min]; **<sup>1</sup>H NMR (400 MHz, DMSO-*d*<sub>6</sub>)**  $\delta$  11.80 (s, 1H), 9.82 (s, 1H), 7.85 (d, *J* = 7.2 Hz, 1H), 7.60 (d, *J* = 7.9 Hz, 1H), 7.46 – 7.33 (m, 4H), 7.26 (dd, *J* = 15.9, 7.1 Hz, 2H), 5.74 (s, 1H). **<sup>13</sup>C NMR (101 MHz, DMSO)**  $\delta$  189.08, 175.53, 153.25, 140.66, 135.85, 133.54, 133.35, 132.65, 131.46, 131.22, 130.50, 128.71, 122.60, 121.57, 121.13, 104.87, 54.80. HRMS (ESI) *m/z* calcd for C<sub>17</sub>H<sub>12</sub>BrN<sub>2</sub>OS ([M+H]<sup>+</sup>): 370.9848, found: 370.9842.

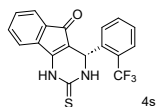

*(S)*-2-thioxo-4-(2-(trifluoromethyl)phenyl)-1,2,3,4-tetrahydro-5H-indeno[1,2-d]pyrimidin-5-one (**4s**)

The crude product was purified by flash column chromatography (DCM/EA = 40/1) on silicagel. Red

solid, 42% yield (15.00 mg),  $[\alpha]_D^{25} = -1120$  (c = 0.10, EtOH), 94% ee [Daicel Chiralcel AD column, *n*-hexane/ *i*-PrOH = 80 / 20, 1.0 ml/min,  $\lambda = 254$  nm, t(major) = 9.7 min, t(minor) = 7.5 min]; **<sup>1</sup>H NMR (400 MHz, DMSO-*d*<sub>6</sub>)**  $\delta$  11.84 (s, 1H), 9.88 (s, 1H), 7.88 (d, *J* = 7.2 Hz, 1H), 7.74 – 7.65 (m, 2H), 7.59 – 7.44 (m, 3H), 7.38 (t, *J* = 7.4 Hz, 1H), 7.27 (d, *J* = 7.0 Hz, 1H), 5.68 (s, 1H). **<sup>13</sup>C NMR (101 MHz, DMSO)**  $\delta$  188.85, 175.28, 170.76, 153.05, 141.41, 135.76, 133.63, 133.24, 132.66, 131.25, 131.04,

129.03, 125.89, 121.57, 121.16, 105.30, 60.20, 50.55, 21.20, 14.54. HRMS (ESI)  $m/z$  calcd for  $C_{18}H_{12}F_3N_2OS$  ( $[M+H]^+$ ): 361.0617, found: 361.0610.

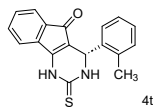

*(S)*-2-thioxo-4-(*o*-tolyl)-1,2,3,4-tetrahydro-5H-indeno[1,2-*d*]pyrimidin-5-one (**4t**) The crude product was purified by flash column chromatography (DCM/EA = 40/1) on silicagel. Red solid, 68% yield (23.80 mg),  $[\alpha]_D^{25} = -930$  (c = 0.10, EtOH), 92% ee [Daicel Chiralcel AD column, *n*-hexane/ *i*-PrOH = 80 / 20, 1.0 ml/min,  $\lambda = 254$  nm, t(major) = 12.2 min, t(minor) = 8.8 min];  $^1H$  NMR (400 MHz, DMSO- $d_6$ )  $\delta$  11.75 (s, 1H), 9.75 (s, 1H), 7.83 (d,  $J = 7.2$  Hz, 1H), 7.44 (t,  $J = 7.4$  Hz, 1H), 7.35 (t,  $J = 7.4$  Hz, 1H), 7.28 (d,  $J = 7.0$  Hz, 1H), 7.17 (t,  $J = 4.2$  Hz, 4H), 5.56 (s, 1H), 2.47 (s, 3H).  $^{13}C$  NMR (101 MHz, DMSO)  $\delta$  189.49, 175.18, 152.60, 141.33, 135.99, 135.66, 133.33, 132.68, 131.10, 130.84, 128.31, 128.24, 127.07, 121.56, 121.00, 106.60, 51.14, 19.32. HRMS (ESI)  $m/z$  calcd for  $C_{18}H_{15}N_2OS$  ( $[M+H]^+$ ): 307.0900, found: 307.0898.

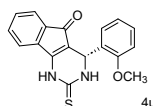

*(S)*-4-(2-methoxyphenyl)-2-thioxo-1,2,3,4-tetrahydro-5H-indeno[1,2-*d*]pyrimidin-5-one (**4u**) The crude product was purified by flash column chromatography (DCM/EA = 40/1) on silicagel. Red solid, 54% yield (17.30 mg),  $[\alpha]_D^{25} = -1050$  (c = 0.10, EtOH), 90% ee [Daicel Chiralcel AD column, *n*-hexane/ *i*-PrOH = 80 / 20, 1.0 ml/min,  $\lambda = 254$  nm, t(major) = 20.9 min, t(minor) = 10.7 min];  $^1H$  NMR (400 MHz, DMSO- $d_6$ )  $\delta$  11.67 (s, 1H), 9.53 (s, 1H), 7.82 (d,  $J = 7.2$  Hz, 1H), 7.44 (t,  $J = 7.5$  Hz, 1H), 7.32 (dt,  $J = 27.0, 7.3$  Hz, 3H), 7.15 (d,  $J = 7.5$  Hz, 1H), 7.02 (d,  $J = 8.2$  Hz, 1H), 6.92 (t,  $J = 7.4$  Hz, 1H), 5.53 (s, 1H), 3.78 (s, 3H).  $^{13}C$  NMR (101 MHz, DMSO)  $\delta$  189.36, 175.62, 157.63, 153.39, 136.05, 133.53, 132.57, 131.02, 129.99, 129.28, 121.48, 120.92, 120.81, 112.25, 105.16, 56.27, 50.24. HRMS (ESI)  $m/z$  calcd for  $C_{18}H_{15}N_2O_2S$  ( $[M+H]^+$ ): 323.0849, found: 323.0850.

### 3. Copies of HPLC spectra.

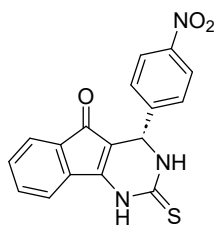

**4a**



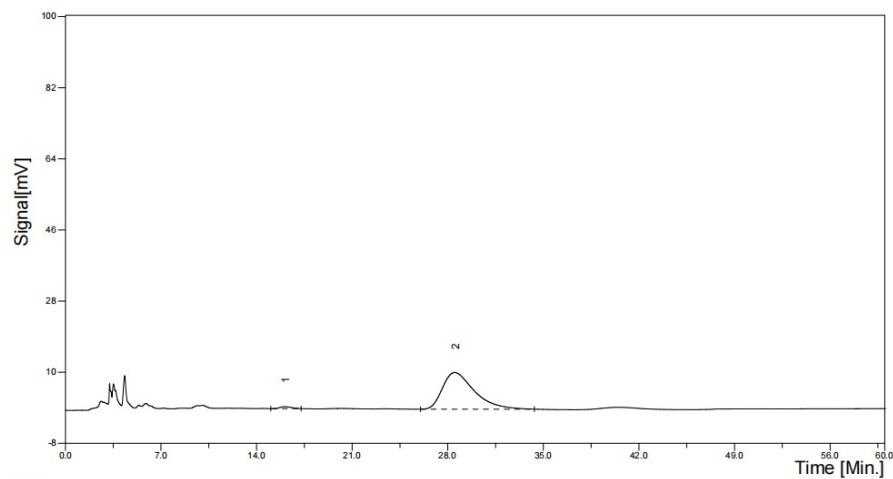

| Peak # | RetTime [min] | Heigh [mV] | Area [mV*s] | Area %  |
|--------|---------------|------------|-------------|---------|
|        | 16.055        | 0.490      | 28.57       | 1.8667  |
|        | 28.491        | 9.29       | 1502.20     | 98.1333 |

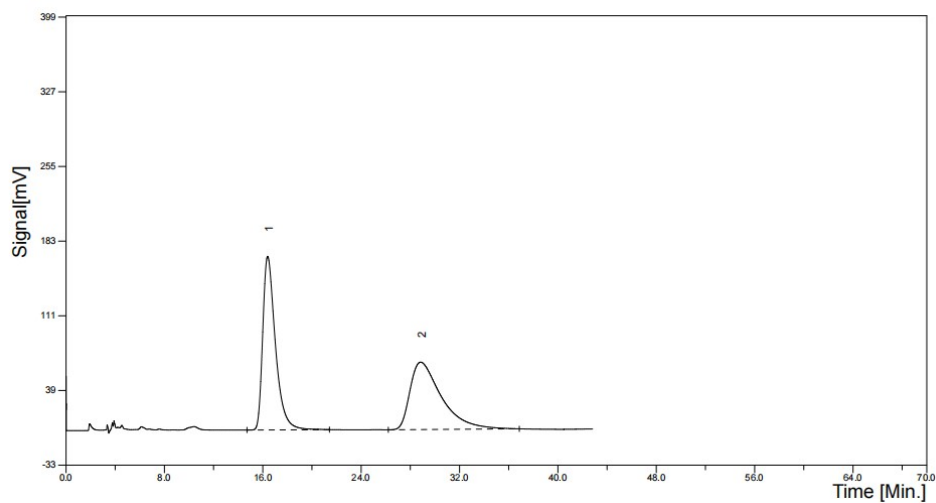

| Peak # | RetTime [min] | Heigh [mV] | Area [mV*s] | Area %  |
|--------|---------------|------------|-------------|---------|
|        | 16.398        | 167.43     | 11961.08    | 50.9686 |
|        | 28.842        | 65.04      | 11506.48    | 49.0314 |

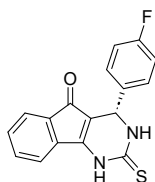

**4b**

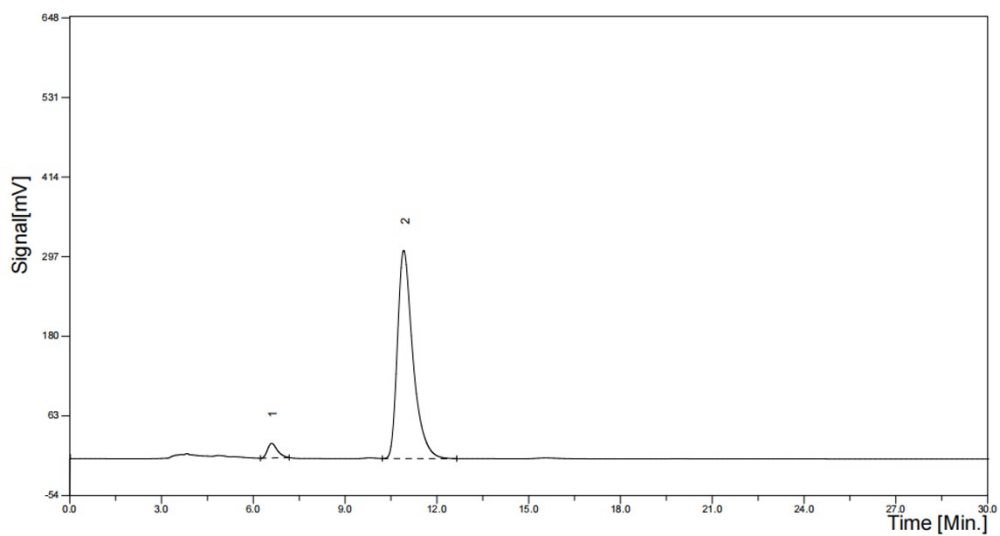

| Peak # | RetTime [min] | Heigh [mV] | Area [mV*s] | Area %  |
|--------|---------------|------------|-------------|---------|
| 1      | 6.600         | 21.46      | 482.00      | 4.3043  |
| 2      | 10.917        | 65.04      | 10715.99    | 95.6957 |

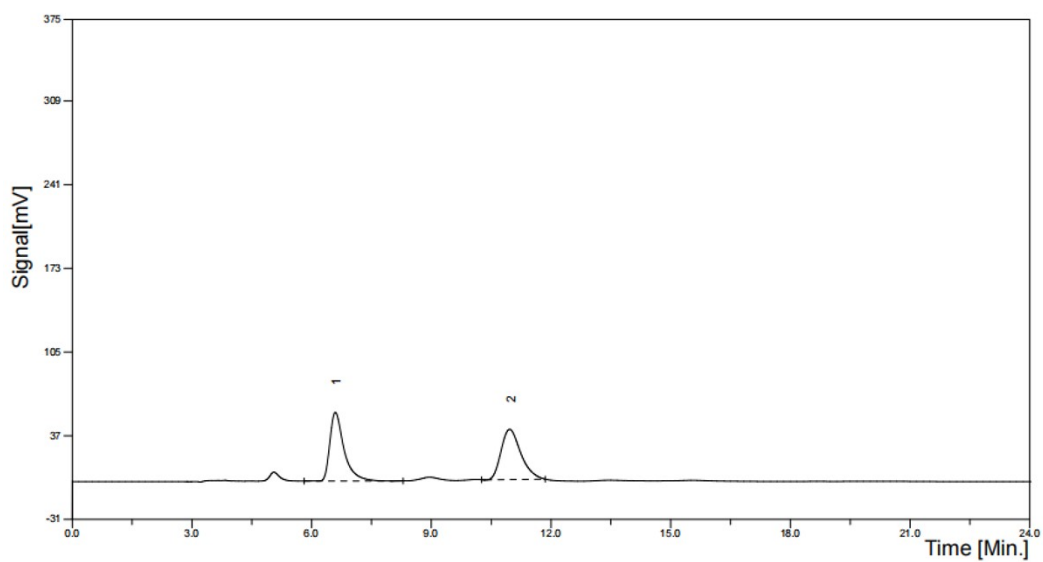

| Peak # | RetTime [min] | Heigh [mV] | Area [mV*s] | Area %  |
|--------|---------------|------------|-------------|---------|
| 1      | 6.595         | 55.79      | 1370.00     | 49.5167 |
| 2      | 10.962        | 40.77      | 1396.74     | 50.4833 |

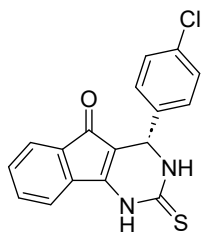

**4c**

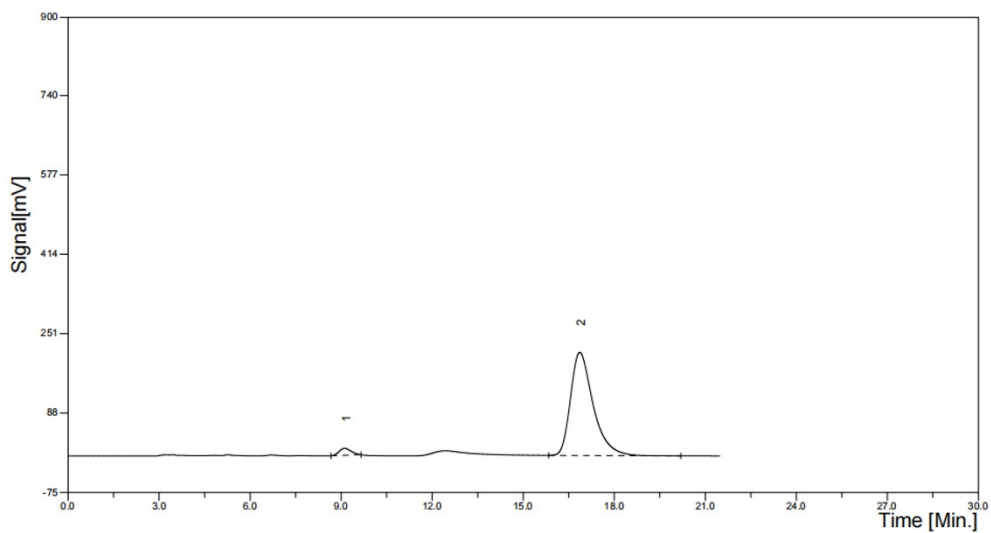

| Peak # | RetTime [min] | Heigh [mV] | Area [mV*s] | Area %  |
|--------|---------------|------------|-------------|---------|
| 1      | 9.112         | 14.17      | 387.28      | 3.4206  |
| 2      | 16.864        | 211.79     | 10934.72    | 96.5794 |

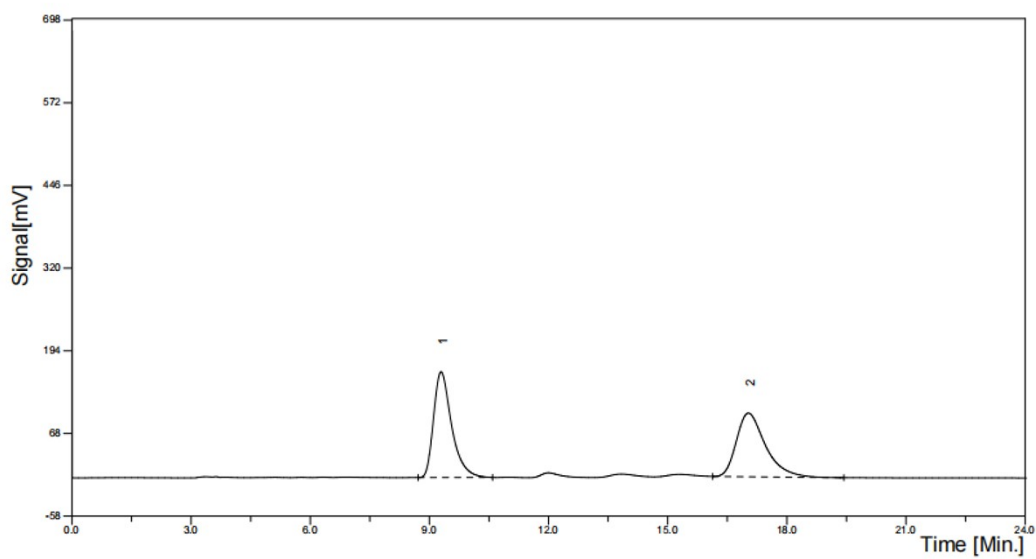

| Peak # | RetTime [min] | Heigh [mV] | Area [mV*s] | Area %  |
|--------|---------------|------------|-------------|---------|
| 1      | 9.295         | 161.23     | 5085.06     | 50.7738 |
| 2      | 17.032        | 97.06      | 4930.07     | 49.2262 |

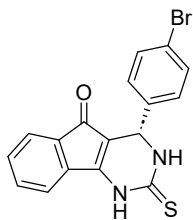

**4d**

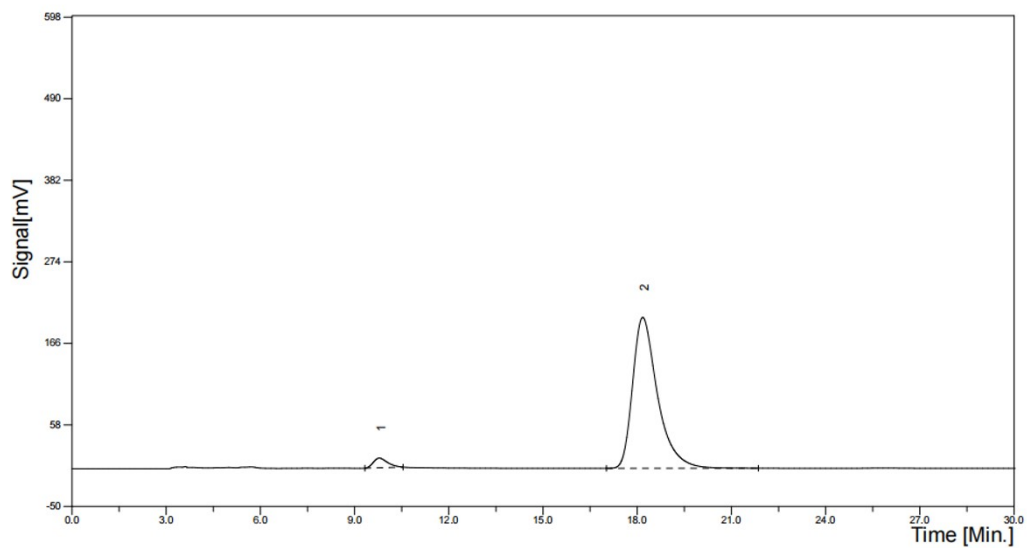

| Peak # | RetTime [min] | Heigh [mV] | Area [mV*s] | Area %  |
|--------|---------------|------------|-------------|---------|
|        | 9.787         | 12.80      | 402.99      | 3.5309  |
|        | 18.175        | 199.90     | 11010.14    | 96.4691 |

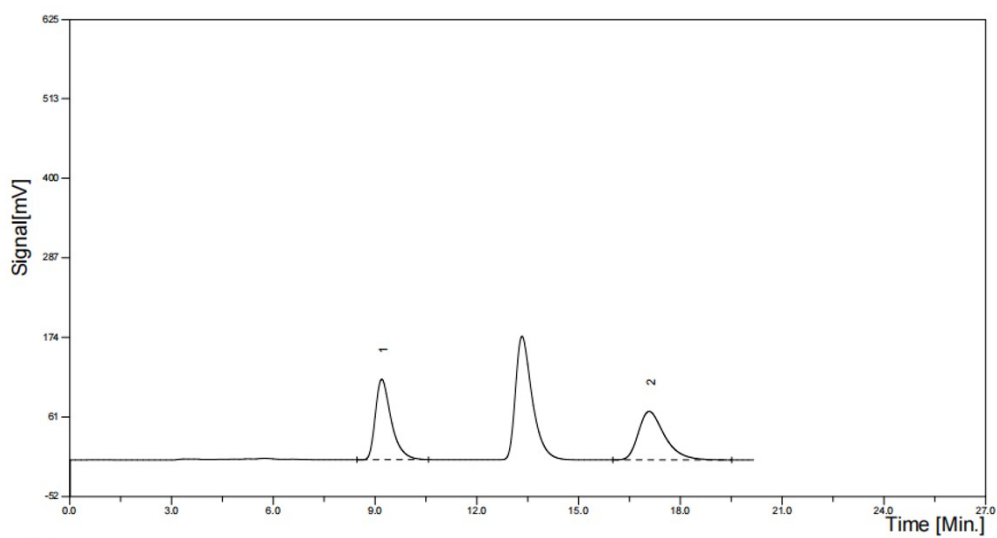

| Peak # | RetTime [min] | Heigh [mV] | Area [mV*s] | Area %  |
|--------|---------------|------------|-------------|---------|
|        | 9.196         | 114.19     | 3692.82     | 50.0277 |
|        | 17.080        | 68.83      | 3688.73     | 49.9723 |

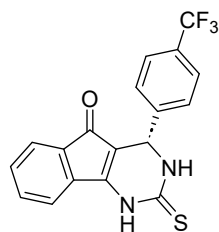

**4e**

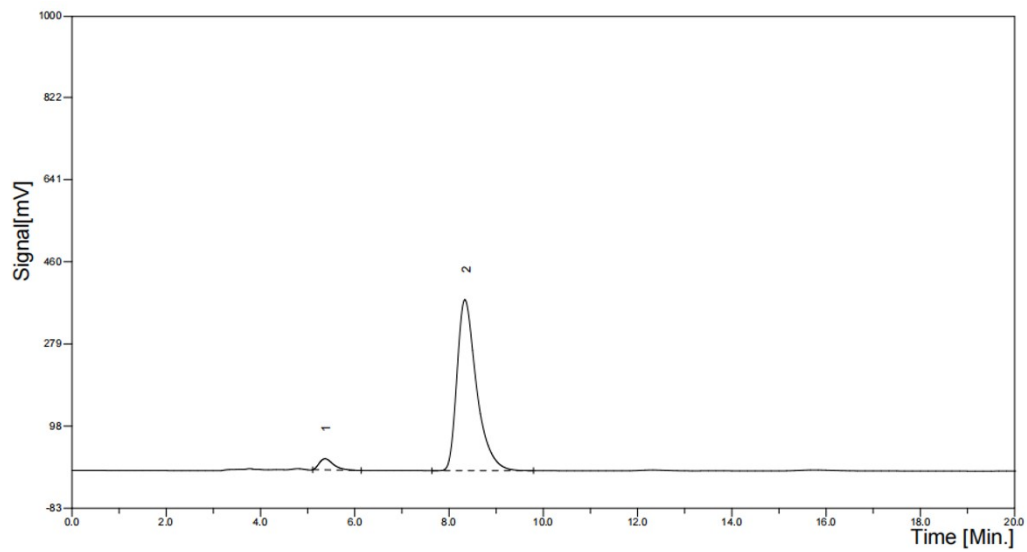

| Peak # | RetTime [min] | Heigh [mV] | Area [mV*s] | Area %  |
|--------|---------------|------------|-------------|---------|
| 1      | 5.368         | 24.70      | 517.33      | 4.5529  |
| 2      | 8.337         | 376.74     | 10845.29    | 95.4471 |

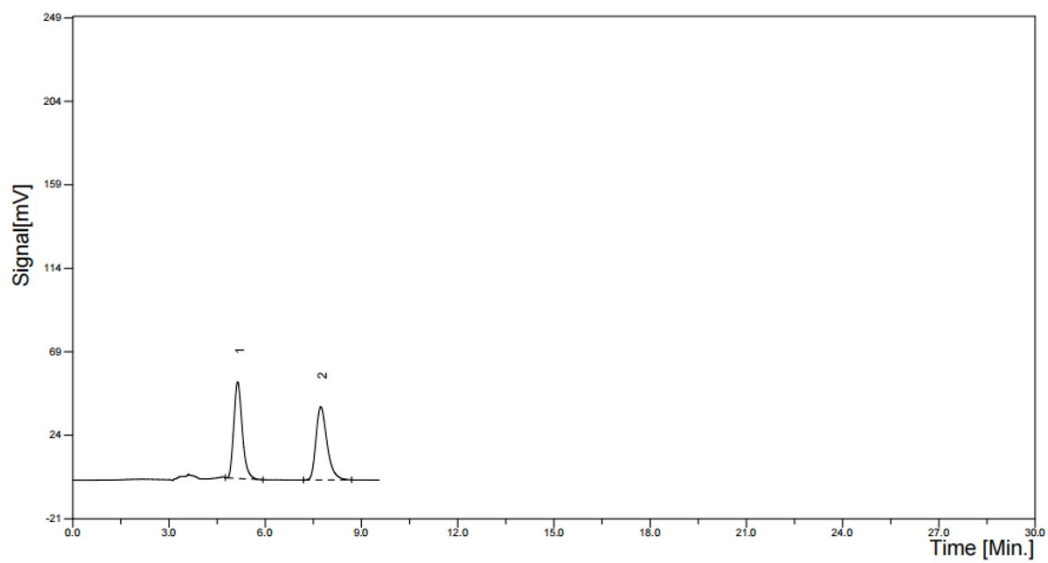

| Peak # | RetTime [min] | Heigh [mV] | Area [mV*s] | Area %  |
|--------|---------------|------------|-------------|---------|
| 1      | 5.141         | 52.04      | 943.16      | 49.9602 |
| 2      | 7.729         | 39.42      | 944.67      | 50.0398 |

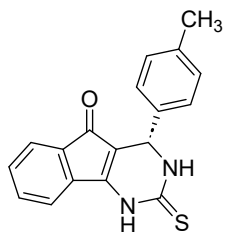

**4f**

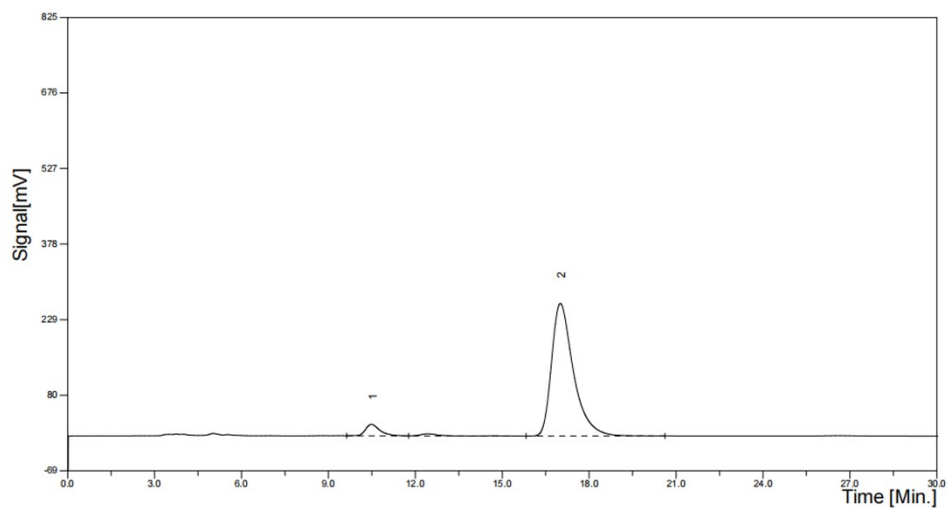

| Peak # | RetTime [min] | Heigh [mV] | Area [mV*s] | Area %  |
|--------|---------------|------------|-------------|---------|
|        | 10.485        | 22.54      | 767.81      | 5.3355  |
|        | 17.005        | 261.39     | 13622.72    | 94.6645 |

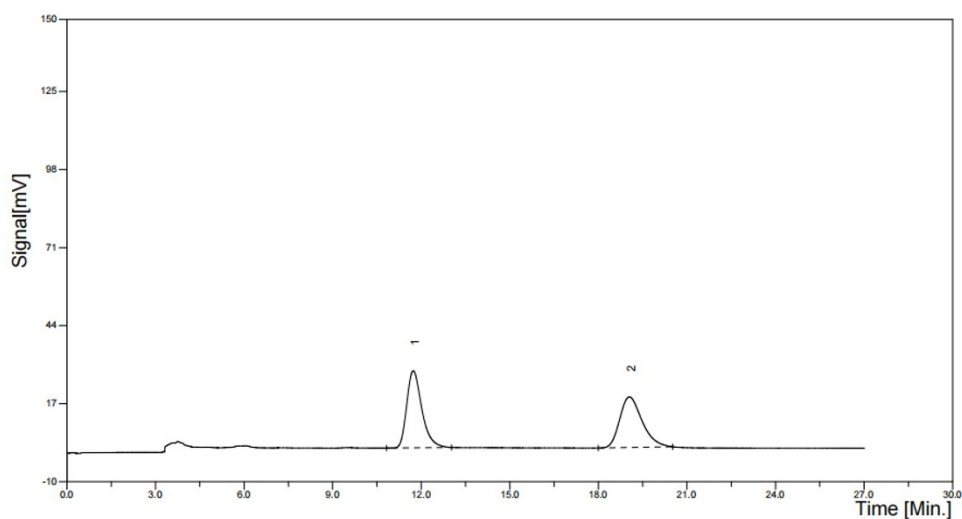

| Peak # | RetTime [min] | Heigh [mV] | Area [mV*s] | Area %  |
|--------|---------------|------------|-------------|---------|
|        | 11.732        | 26.70      | 946.08      | 50.6712 |
|        | 19.052        | 17.55      | 921.02      | 49.3288 |

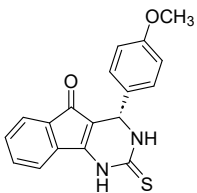

**4g**

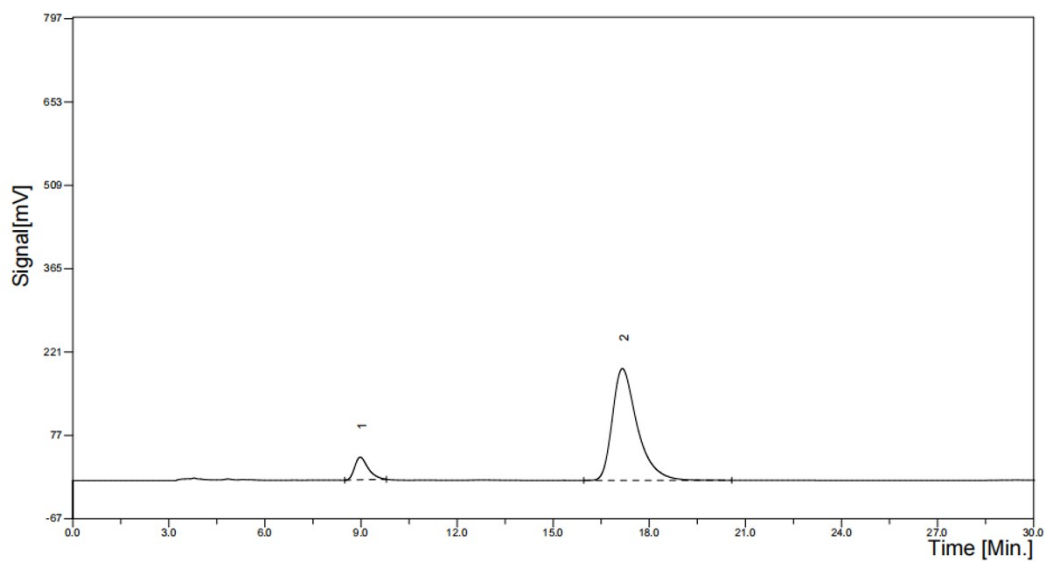

| Peak # | RetTime [min] | Heigh [mV] | Area [mV*s] | Area %  |
|--------|---------------|------------|-------------|---------|
|        | 8.976         | 39.27      | 1152.51     | 9.9479  |
|        | 17.160        | 193.17     | 10432.96    | 90.0521 |

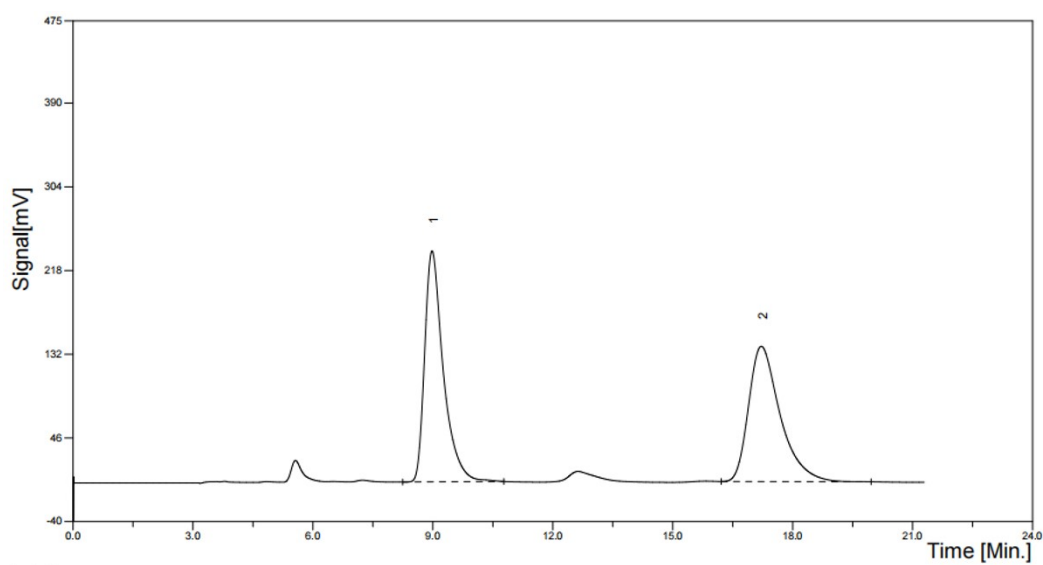

| Peak # | RetTime [min] | Heigh [mV] | Area [mV*s] | Area %  |
|--------|---------------|------------|-------------|---------|
|        | 8.980         | 237.38     | 7696.11     | 50.2200 |
|        | 17.216        | 139.05     | 7628.69     | 49.7800 |

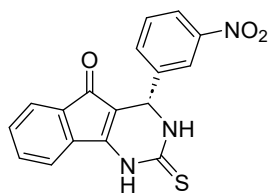

**4h**

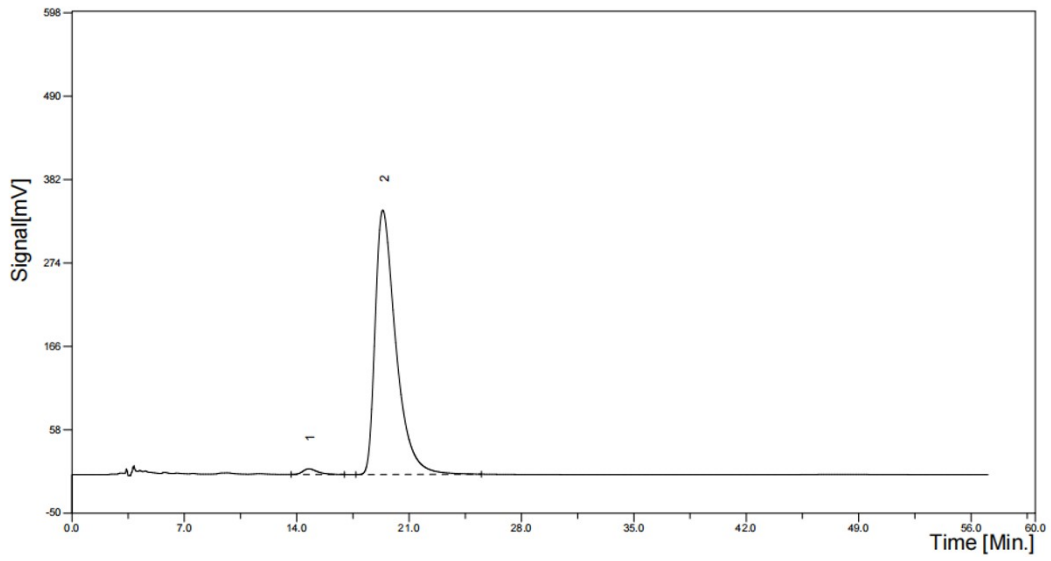

| Peak # | RetTime [min] | Heigh [mV] | Area [mV*s] | Area %  |
|--------|---------------|------------|-------------|---------|
|        | 14.758        | 7.28       | 458.59      | 1.4784  |
|        | 19.362        | 342.26     | 30560.55    | 98.5216 |

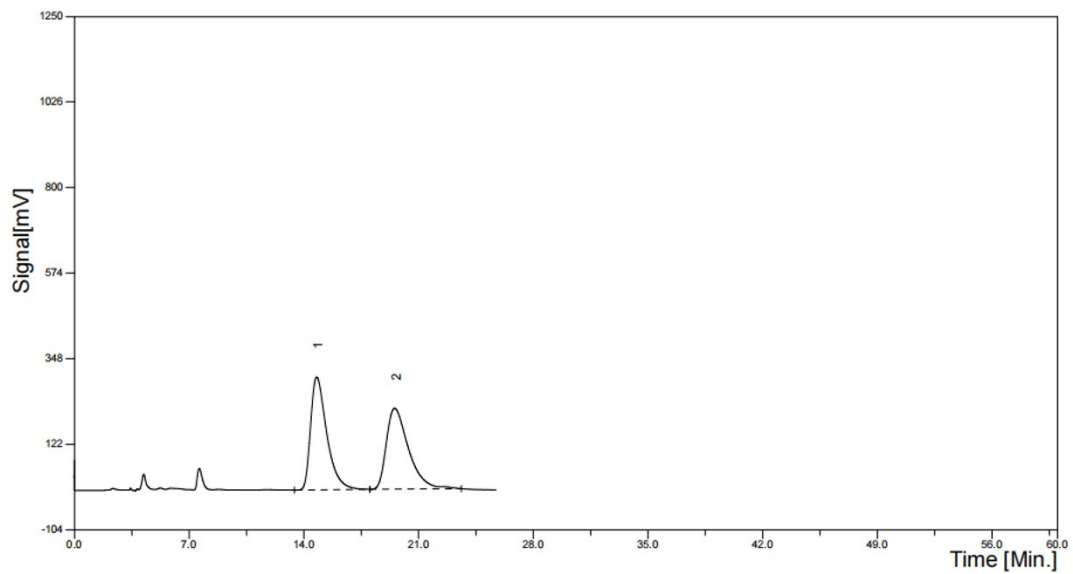

| Peak # | RetTime [min] | Heigh [mV] | Area [mV*s] | Area %  |
|--------|---------------|------------|-------------|---------|
|        | 14.787        | 297.89     | 20369.09    | 50.3861 |
|        | 19.543        | 213.53     | 20056.88    | 49.6139 |

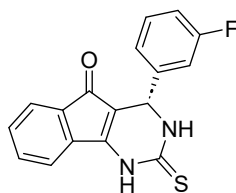

**4i**



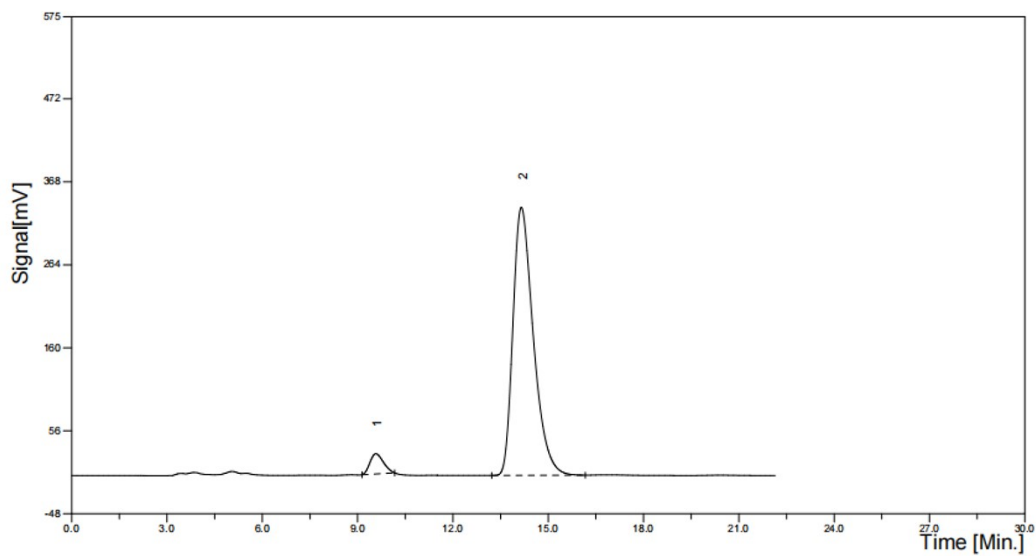

| Peak # | RetTime [min] | Heigh [mV] | Area [mV*s] | Area %  |
|--------|---------------|------------|-------------|---------|
|        | 9.578         | 25.38      | 742.99      | 4.7254  |
|        | 14.153        | 335.92     | 14980.41    | 95.2746 |

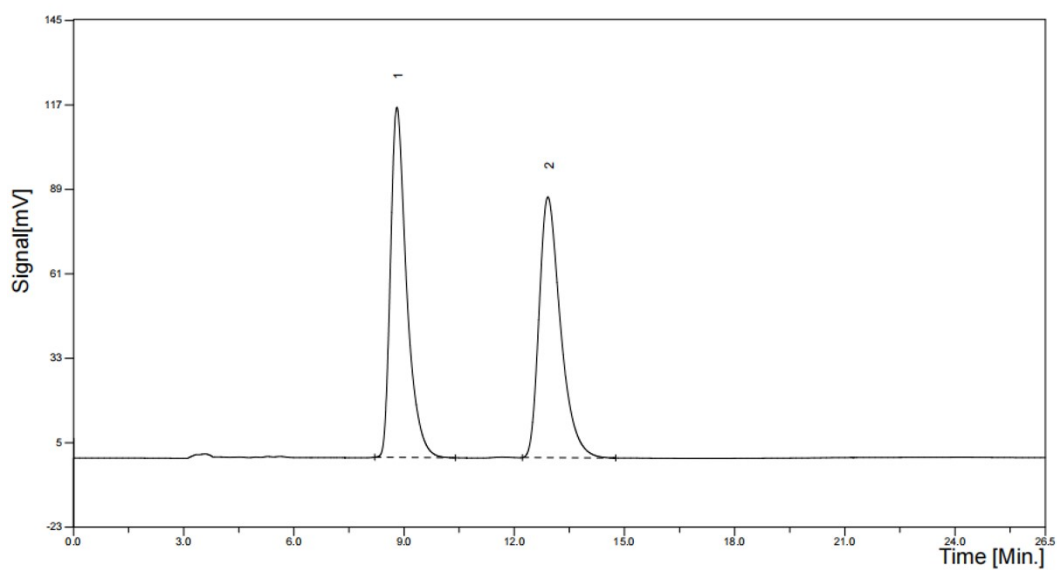

| Peak # | RetTime [min] | Heigh [mV] | Area [mV*s] | Area %  |
|--------|---------------|------------|-------------|---------|
|        | 8.806         | 116.14     | 3536.67     | 50.2620 |
|        | 12.916        | 86.48      | 3499.80     | 49.7380 |

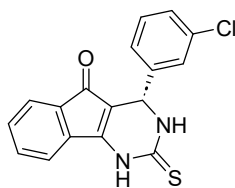

**4j**

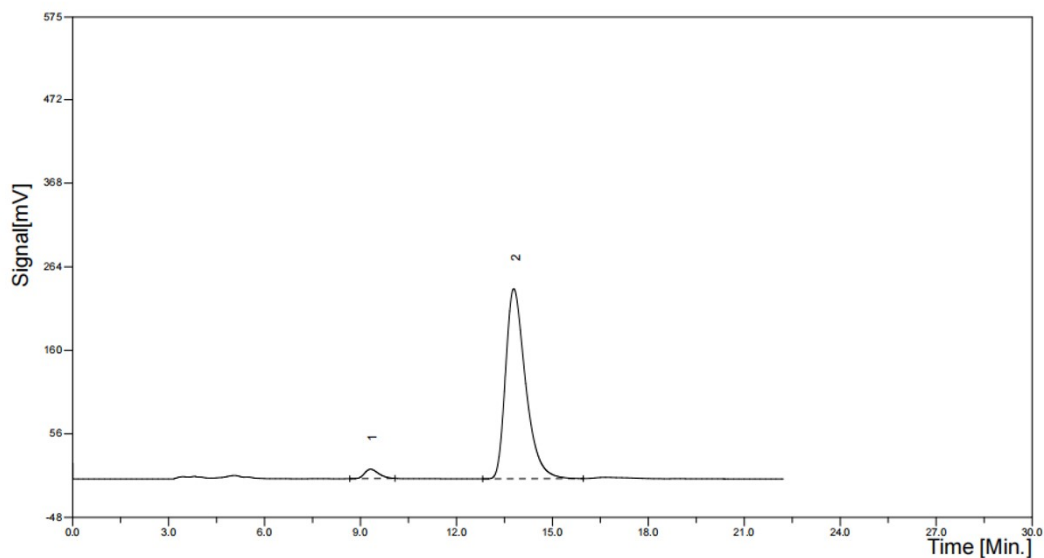

| Peak # | RetTime [min] | Heigh [mV] | Area [mV*s] | Area %  |
|--------|---------------|------------|-------------|---------|
|        | 9.313         | 11.66      | 354.43      | 3.3353  |
|        | 13.793        | 236.60     | 10272.23    | 96.6647 |

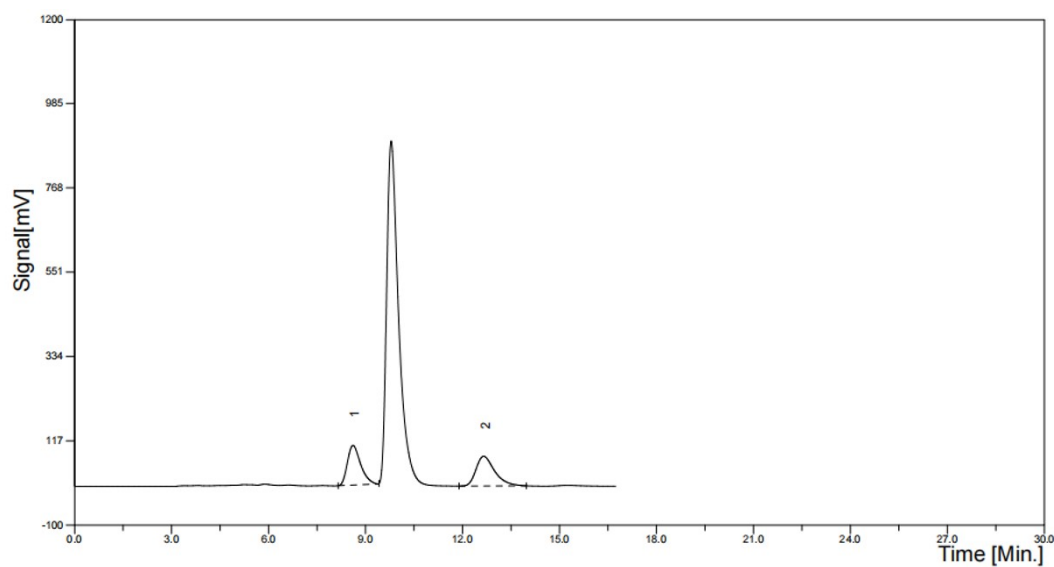

| Peak # | RetTime [min] | Heigh [mV] | Area [mV*s] | Area %  |
|--------|---------------|------------|-------------|---------|
|        | 8.613         | 101.70     | 2855.82     | 48.2942 |
|        | 12.653        | 76.45      | 3057.57     | 51.7058 |

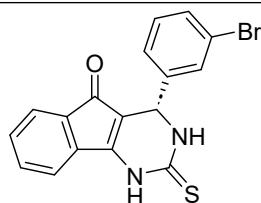

**4k**

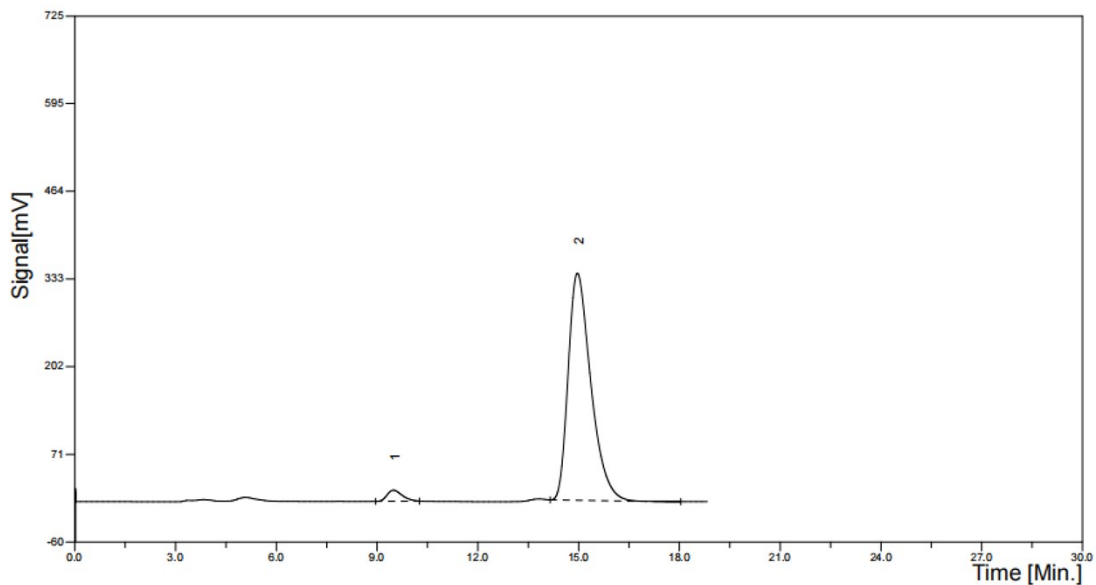

| Peak # | RetTime [min] | Heigh [mV] | Area [mV*s] | Area %  |
|--------|---------------|------------|-------------|---------|
| 1      | 9.485         | 16.56      | 514.45      | 3.1396  |
| 2      | 14.963        | 339.24     | 15871.30    | 96.8604 |

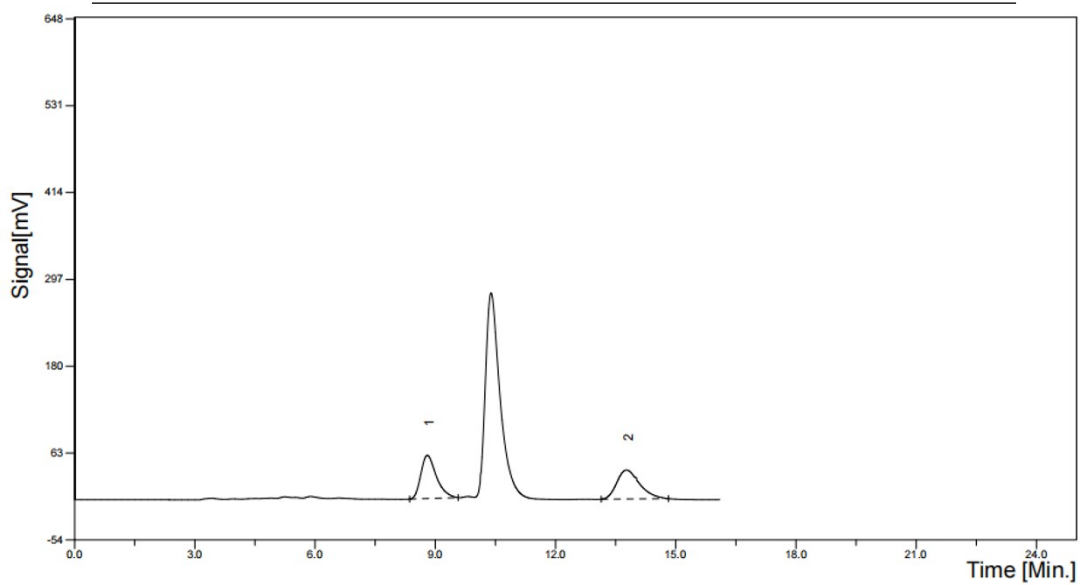

| Peak # | RetTime [min] | Heigh [mV] | Area [mV*s] | Area %  |
|--------|---------------|------------|-------------|---------|
| 1      | 8.800         | 58.29      | 1565.28     | 50.3595 |
| 2      | 13.7768       | 39.04      | 1542.93     | 49.6405 |

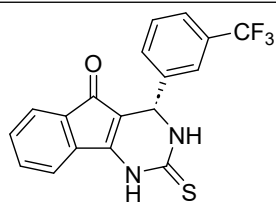

**41**

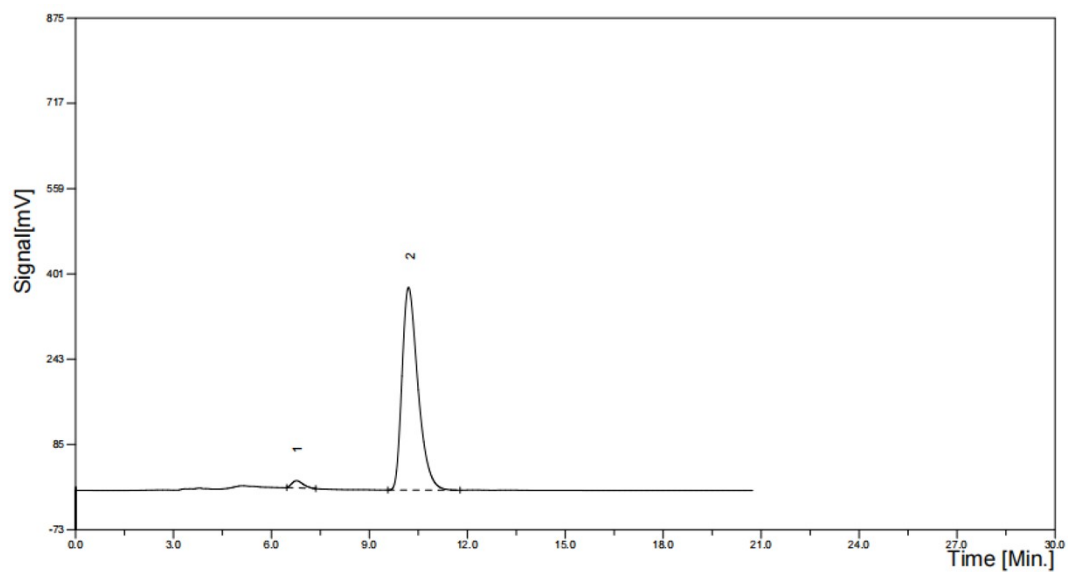

| Peak # | RetTime [min] | Heigh [mV] | Area [mV*s] | Area %  |
|--------|---------------|------------|-------------|---------|
| 1      | 6.768         | 13.26      | 318.69      | 2.4473  |
| 2      | 10.201        | 375.42     | 12703.26    | 97.5527 |

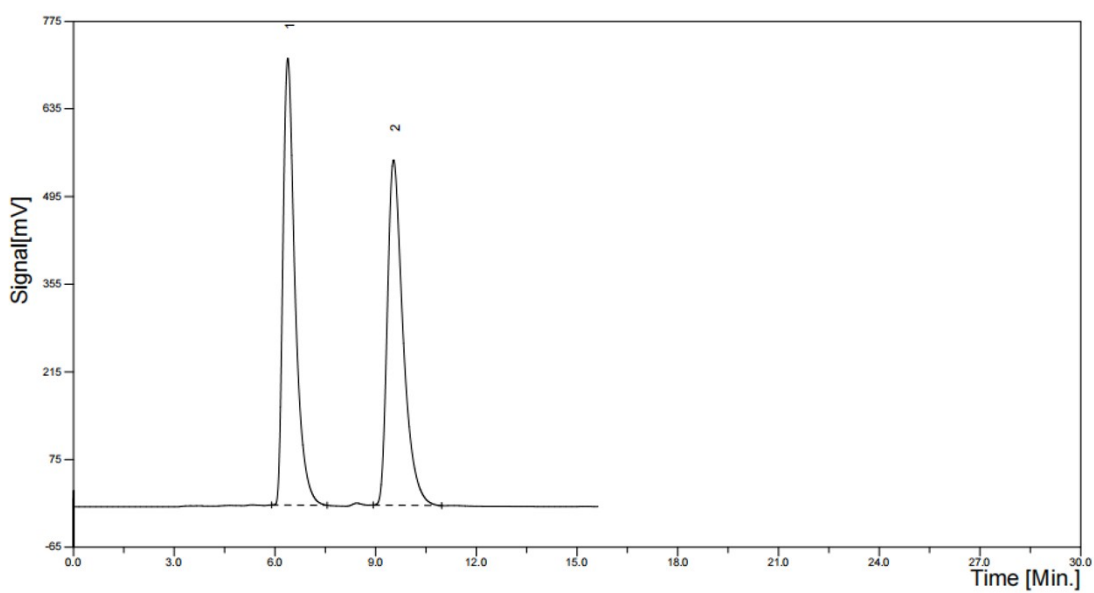

| Peak # | RetTime [min] | Heigh [mV] | Area [mV*s] | Area %  |
|--------|---------------|------------|-------------|---------|
| 1      | 6.384         | 713.55     | 17826.56    | 49.8957 |
| 2      | 9.536         | 551.26     | 17901.12    | 50.1043 |

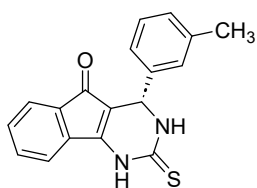

**4m**

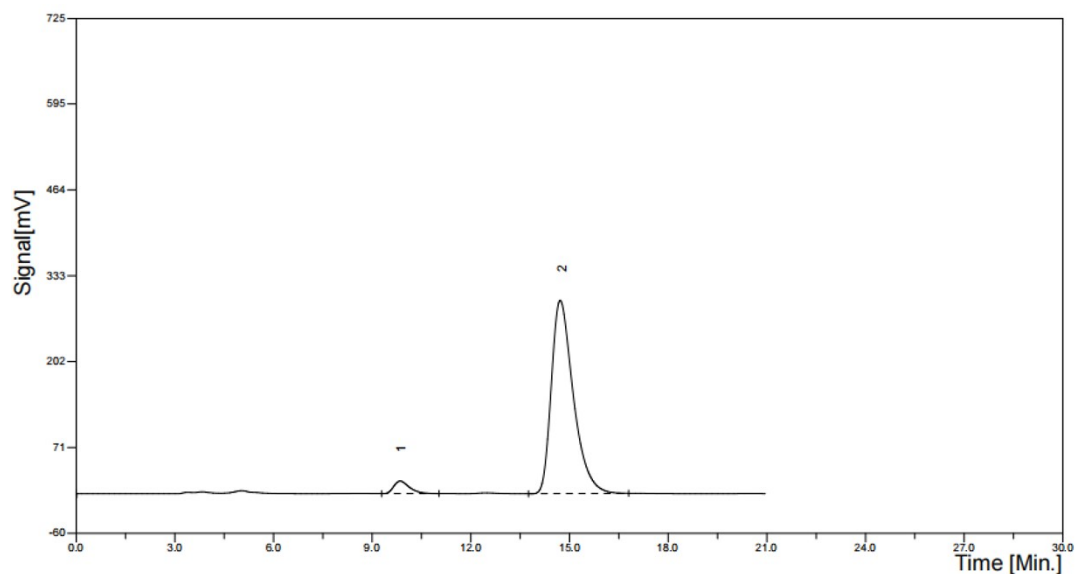

| Peak # | RetTime [min] | Heigh [mV] | Area [mV*s] | Area %  |
|--------|---------------|------------|-------------|---------|
|        | 9.848         | 19.18      | 635.31      | 4.4432  |
|        | 14.717        | 294.98     | 13663.01    | 95.5568 |

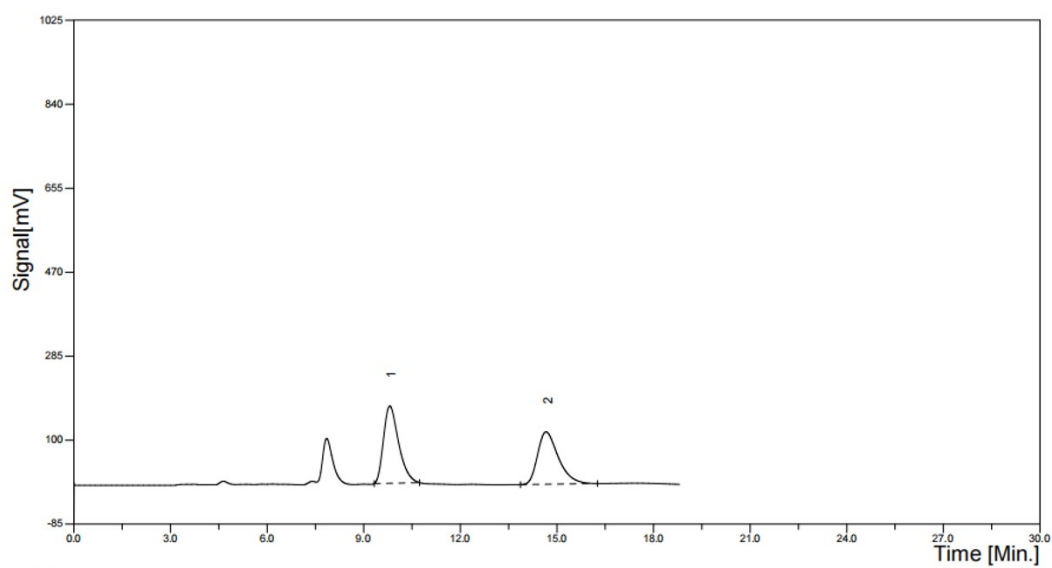

| Peak # | RetTime [min] | Heigh [mV] | Area [mV*s] | Area %  |
|--------|---------------|------------|-------------|---------|
|        | 9.811         | 170.20     | 5561.75     | 51.8126 |
|        | 14.663        | 115.50     | 5172.60     | 48.1874 |

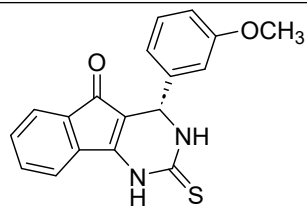

**4n**

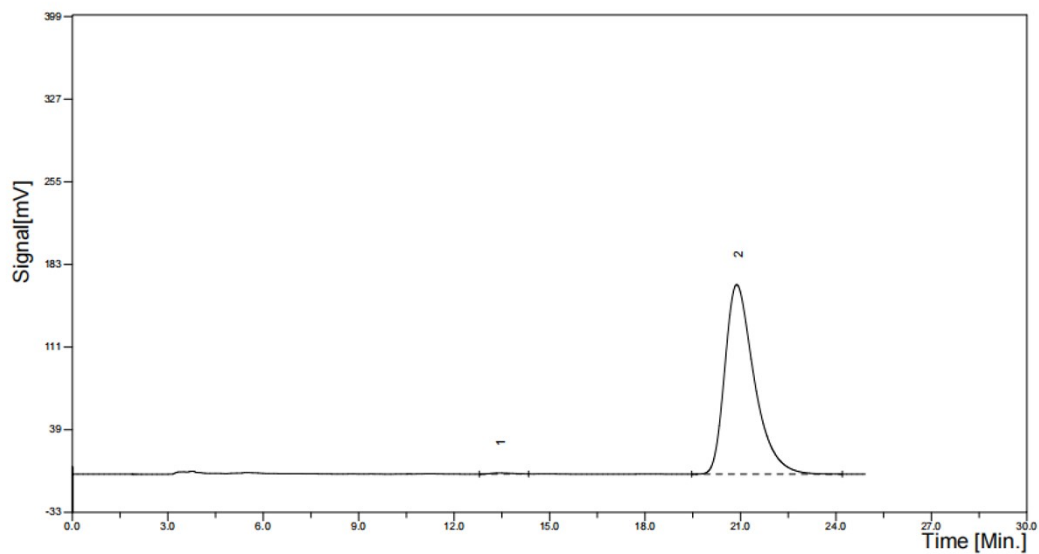

| Peak # | RetTime [min] | Heigh [mV] | Area [mV*s] | Area %  |
|--------|---------------|------------|-------------|---------|
|        | 13.409        | 0.94       | 41.78       | 0.3935  |
|        | 20.882        | 165.10     | 10574.91    | 99.6065 |

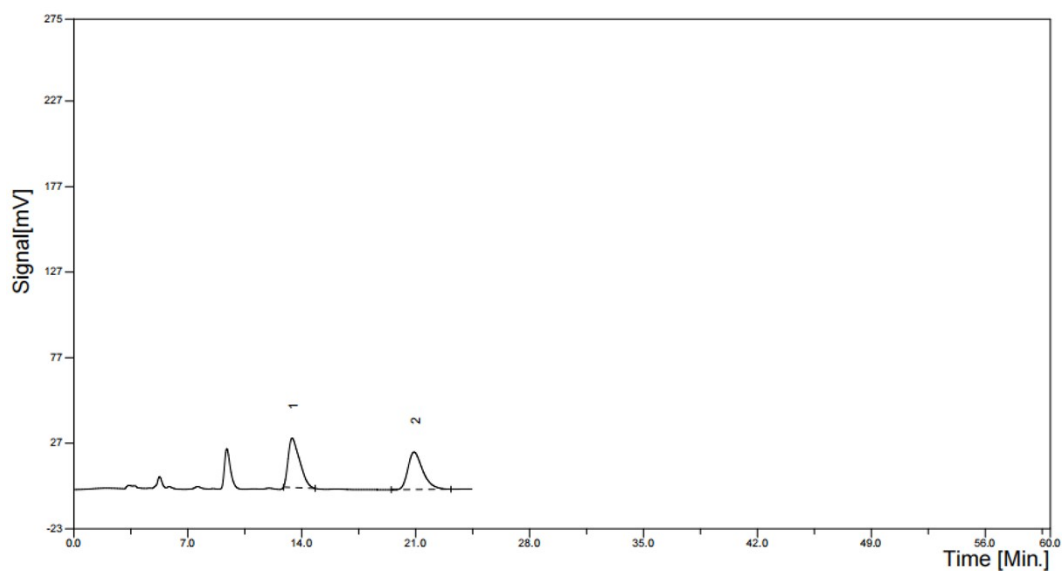

| Peak # | RetTime [min] | Heigh [mV] | Area [mV*s] | Area %  |
|--------|---------------|------------|-------------|---------|
|        | 13.411        | 28.90      | 1412.98     | 50.5988 |
|        | 20.902        | 21.88      | 1379.54     | 49.4012 |

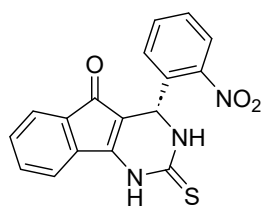

**4o**

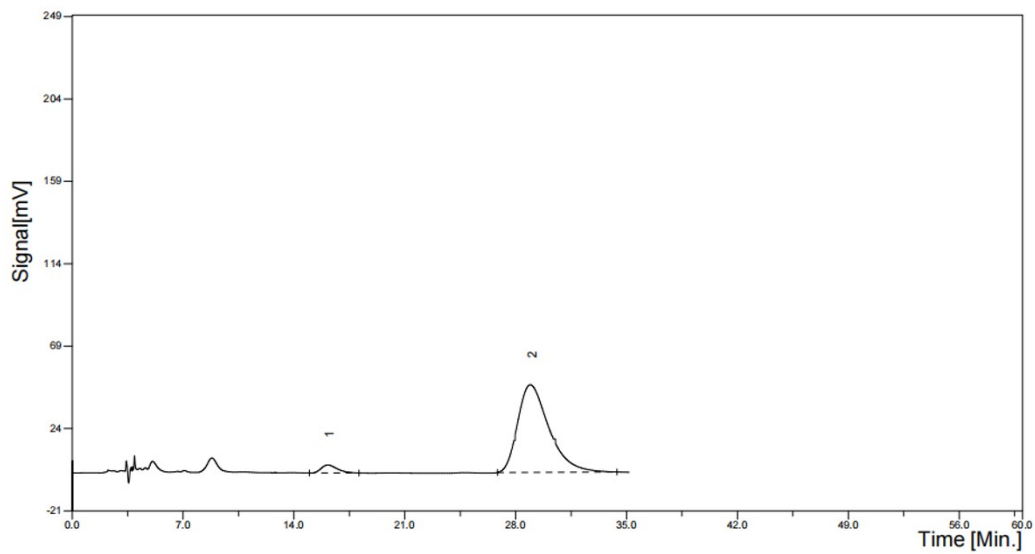

| Peak # | RetTime [min] | Heigh [mV] | Area [mV*s] | Area %  |
|--------|---------------|------------|-------------|---------|
| 1      | 16.133        | 4.36       | 305.58      | 4.4471  |
| 2      | 28.915        | 47.82      | 6565.98     | 95.5529 |

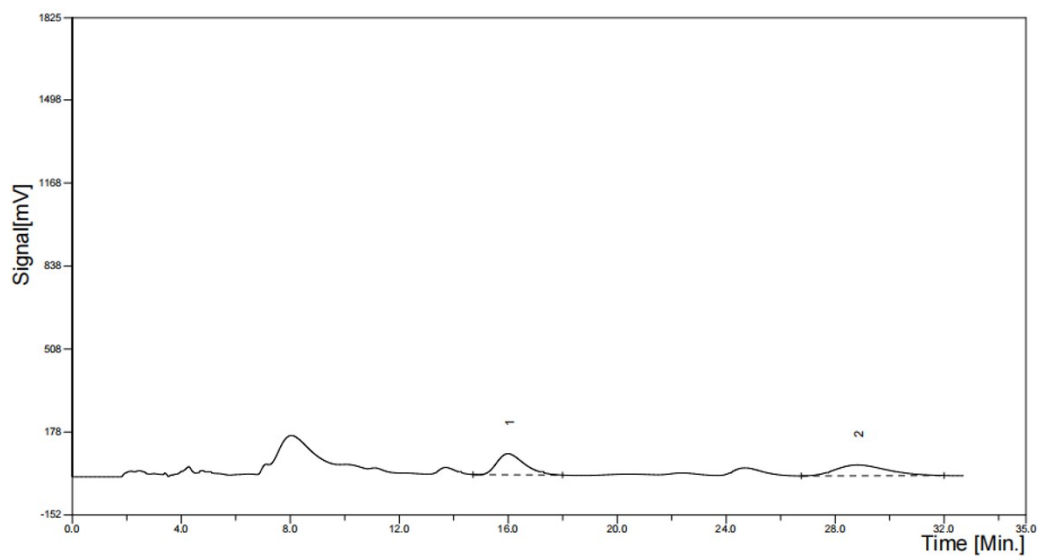

| Peak # | RetTime [min] | Heigh [mV] | Area [mV*s] | Area %  |
|--------|---------------|------------|-------------|---------|
| 1      | 15.992        | 83.49      | 5862.31     | 51.1588 |
| 2      | 28.815        | 42.96      | 5596.73     | 48.8412 |

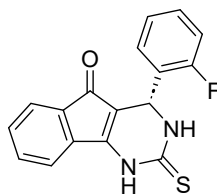

**4p**

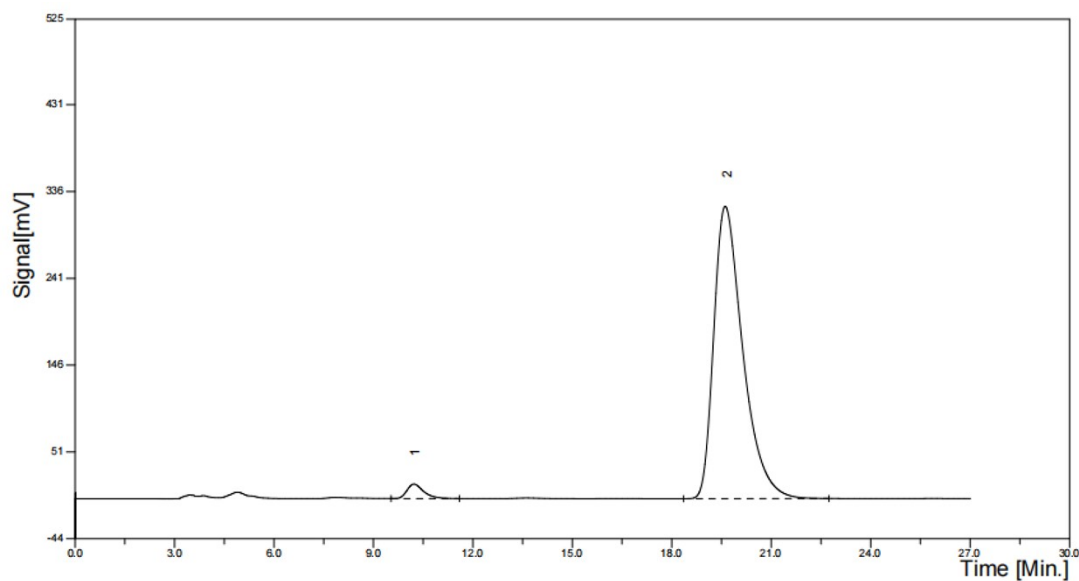

| Peak # | RetTime [min] | Heigh [mV] | Area [mV*s] | Area %  |
|--------|---------------|------------|-------------|---------|
|        | 10.224        | 15.86      | 554.43      | 2.7665  |
|        | 19.613        | 320.10     | 19486.60    | 97.2335 |

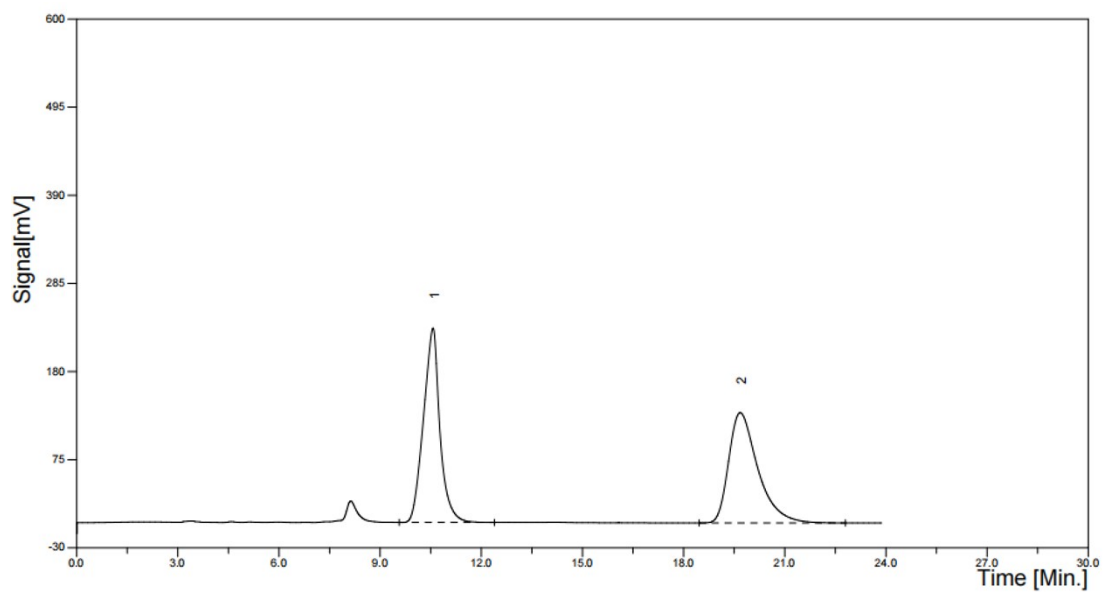

| Peak # | RetTime [min] | Heigh [mV] | Area [mV*s] | Area %  |
|--------|---------------|------------|-------------|---------|
|        | 10.568        | 231.66     | 7837.64     | 49.8018 |
|        | 19.680        | 131.44     | 7900.04     | 50.1982 |

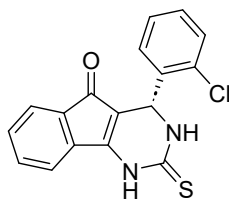

**4q**



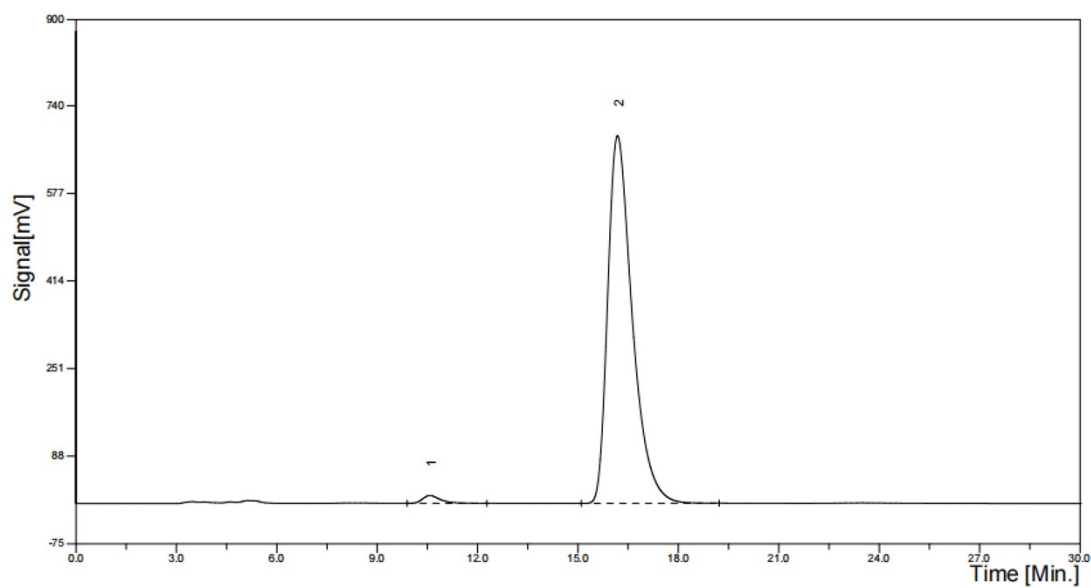

| Peak # | RetTime [min] | Heigh [mV] | Area [mV*s] | Area %  |
|--------|---------------|------------|-------------|---------|
|        | 10.577        | 14.58      | 540.98      | 1.5310  |
|        | 16.182        | 683.75     | 34793.59    | 98.4690 |

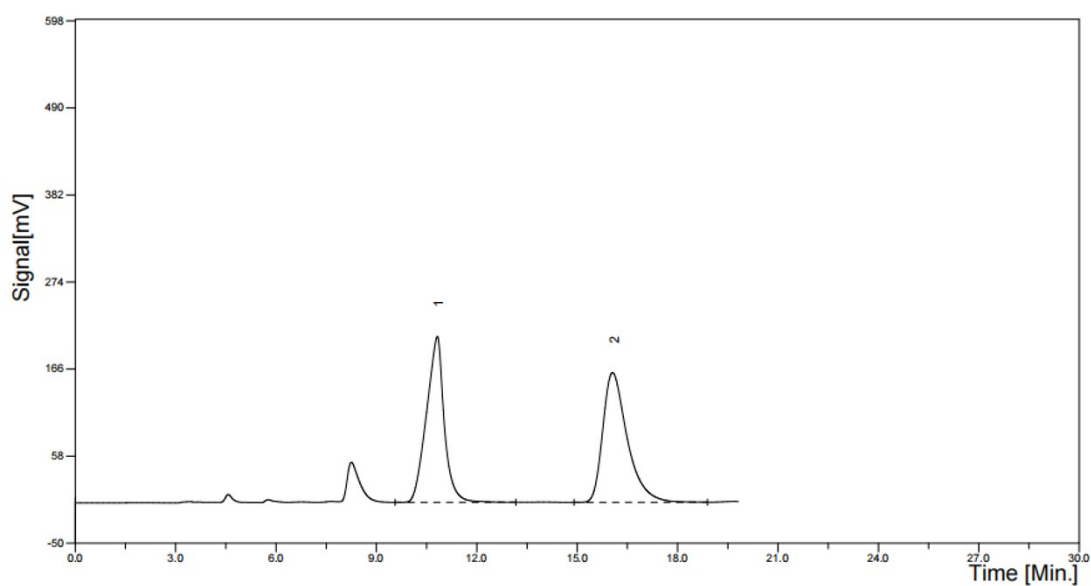

| Peak # | RetTime [min] | Heigh [mV] | Area [mV*s] | Area %  |
|--------|---------------|------------|-------------|---------|
|        | 10.820        | 205.79     | 7575.11     | 48.0845 |
|        | 16.056        | 161.06     | 8178.63     | 51.9155 |

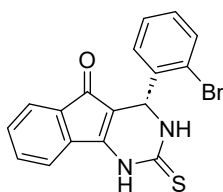

**4r**

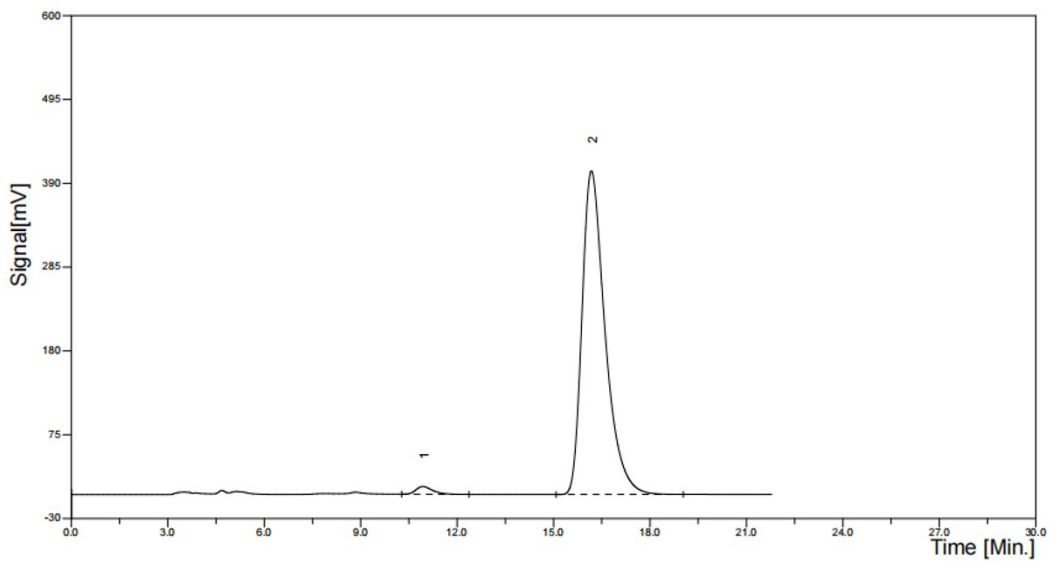

| Peak # | RetTime [min] | Heigh [mV] | Area [mV*s] | Area %  |
|--------|---------------|------------|-------------|---------|
|        | 10.936        | 9.78       | 353.11      | 1.7206  |
|        | 16.177        | 405.41     | 20169.49    | 98.2794 |

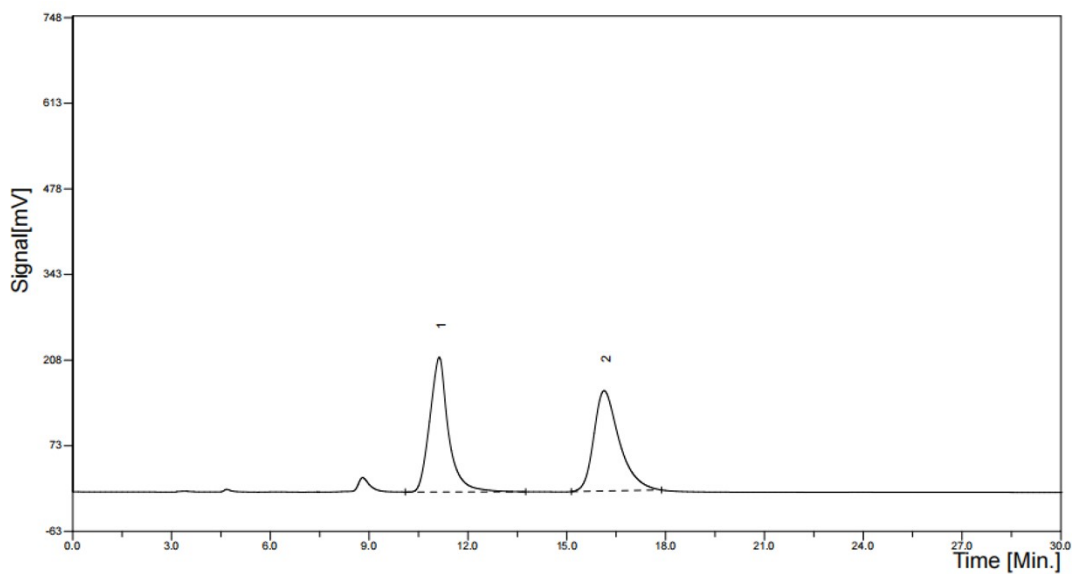

| Peak # | RetTime [min] | Heigh [mV] | Area [mV*s] | Area %  |
|--------|---------------|------------|-------------|---------|
|        | 11.129        | 212.48     | 8359.00     | 49.5915 |
|        | 16.133        | 158.20     | 8496.70     | 50.4085 |

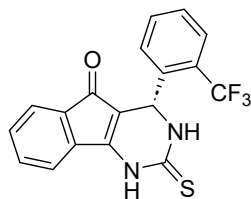

**4s**

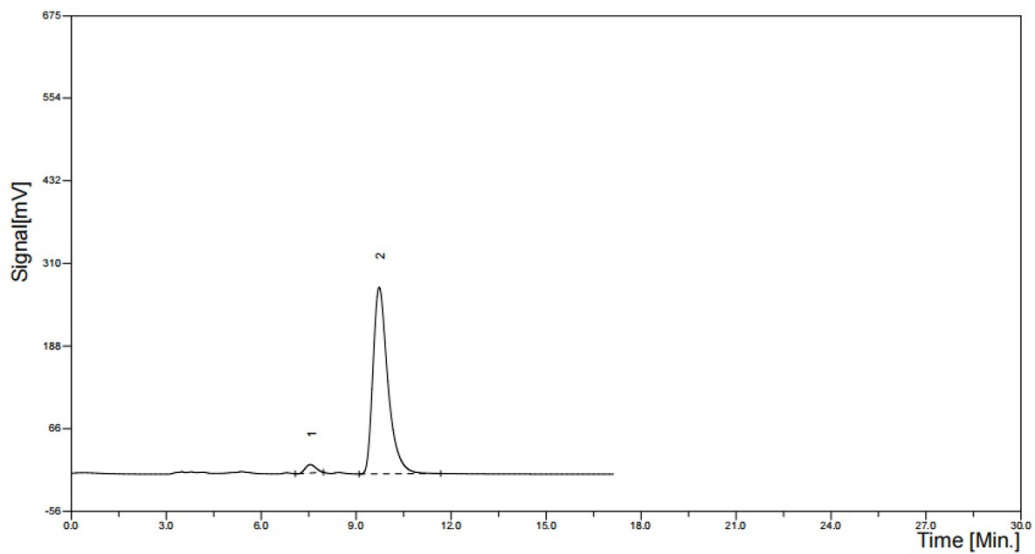

| Peak # | RetTime [min] | Heigh [mV] | Area [mV*s] | Area %  |
|--------|---------------|------------|-------------|---------|
| 1      | 7.549         | 12.37      | 280.97      | 3.0228  |
| 2      | 9.728         | 275.64     | 9013.87     | 96.9772 |

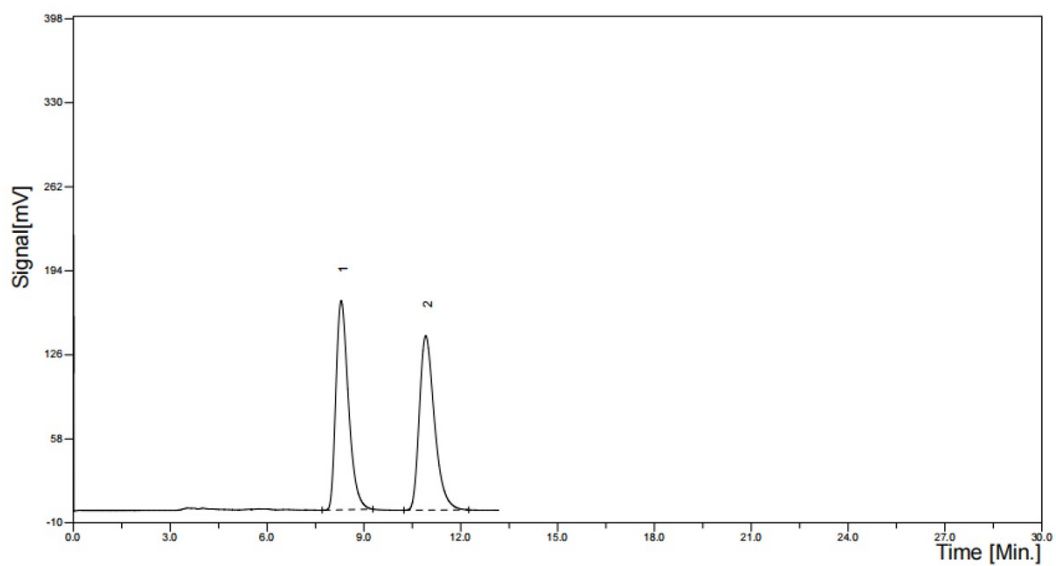

| Peak # | RetTime [min] | Heigh [mV] | Area [mV*s] | Area %  |
|--------|---------------|------------|-------------|---------|
| 1      | 8.298         | 169.23     | 4551.60     | 49.7955 |
| 2      | 10.916        | 141.07     | 4588.99     | 50.2045 |

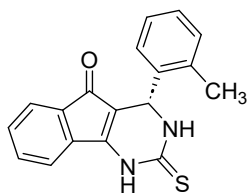

**4t**

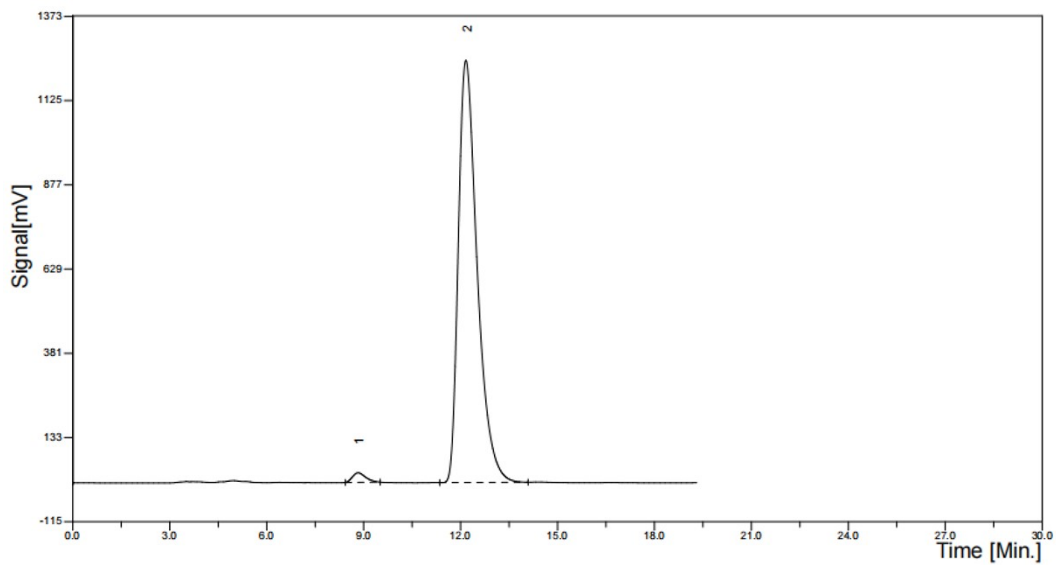

| Peak # | RetTime [min] | Heigh [mV] | Area [mV*s] | Area %  |
|--------|---------------|------------|-------------|---------|
|        | 8.828         | 28.17      | 793.52      | 1.5502  |
|        | 12.165        | 1242.67    | 50394.09    | 98.4498 |

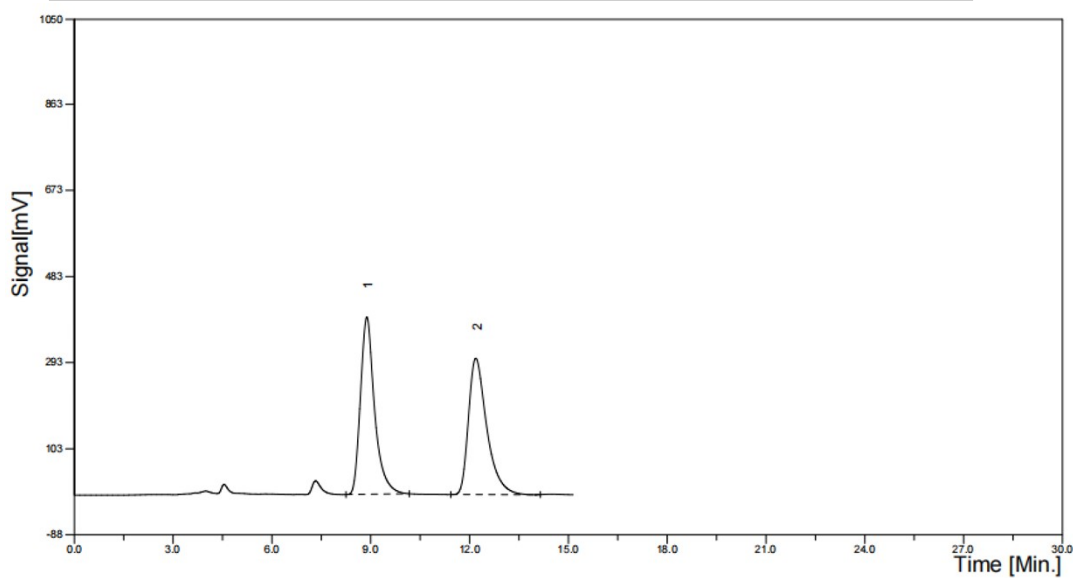

| Peak # | RetTime [min] | Heigh [mV] | Area [mV*s] | Area %  |
|--------|---------------|------------|-------------|---------|
|        | 8.882         | 391.30     | 11683.31    | 50.1949 |
|        | 12.189        | 300.82     | 11592.60    | 49.8051 |

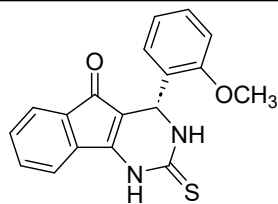

**4u**

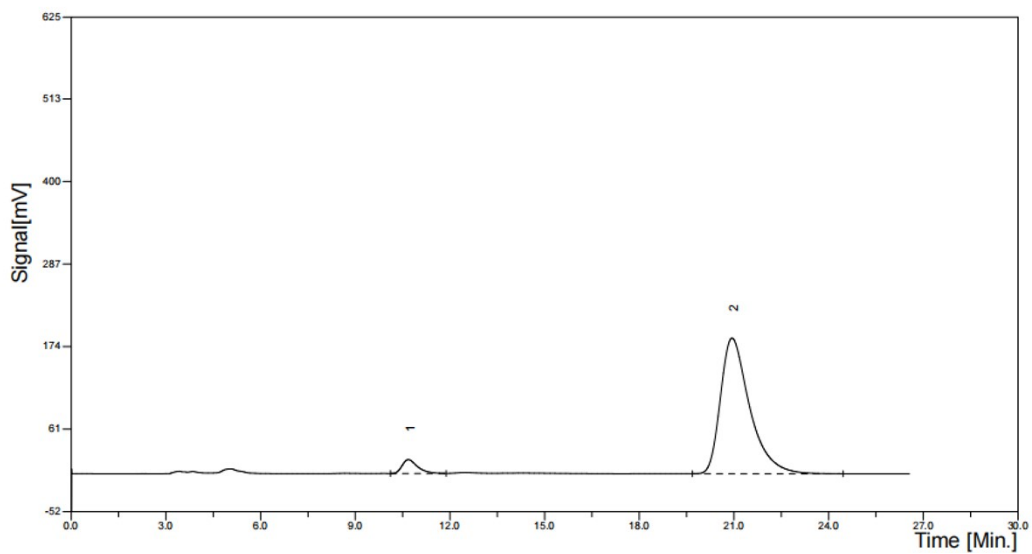

| Peak # | RetTime [min] | Heigh [mV] | Area [mV*s] | Area %  |
|--------|---------------|------------|-------------|---------|
|        | 10.683        | 19.04      | 643.83      | 5.1162  |
|        | 20.940        | 185.73     | 11940.39    | 94.8838 |

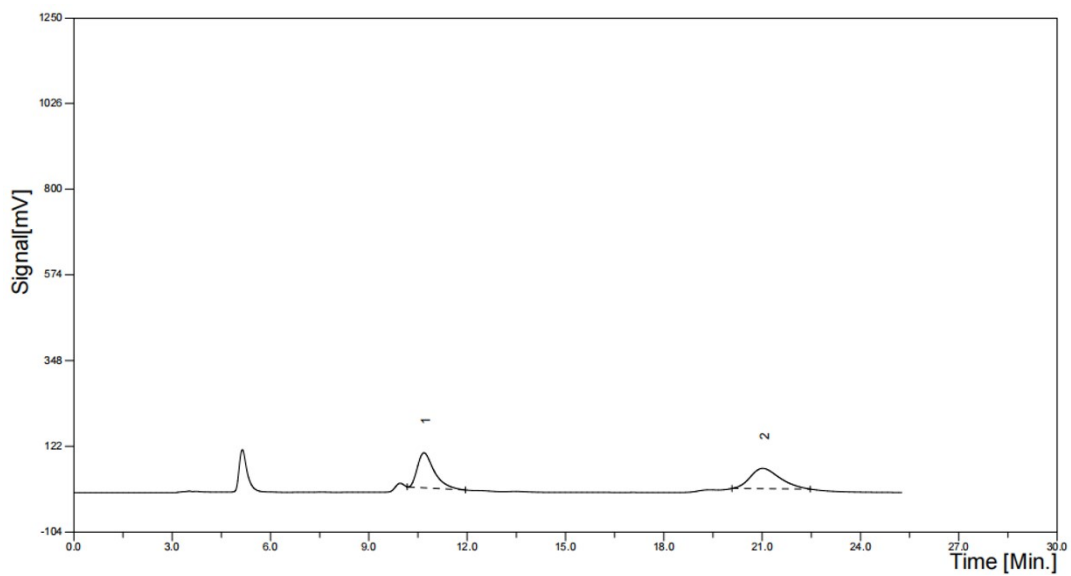

| Peak # | RetTime [min] | Heigh [mV] | Area [mV*s] | Area %  |
|--------|---------------|------------|-------------|---------|
|        | 10.683        | 92.16      | 3278.91     | 49.2808 |
|        | 21.013        | 53.55      | 3374.62     | 50.7192 |

## 4. Copies of NMR spectra.

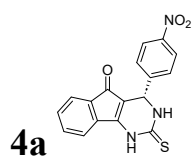

$^1\text{H}$  NMR (400 MHz, DMSO- $d_6$ )

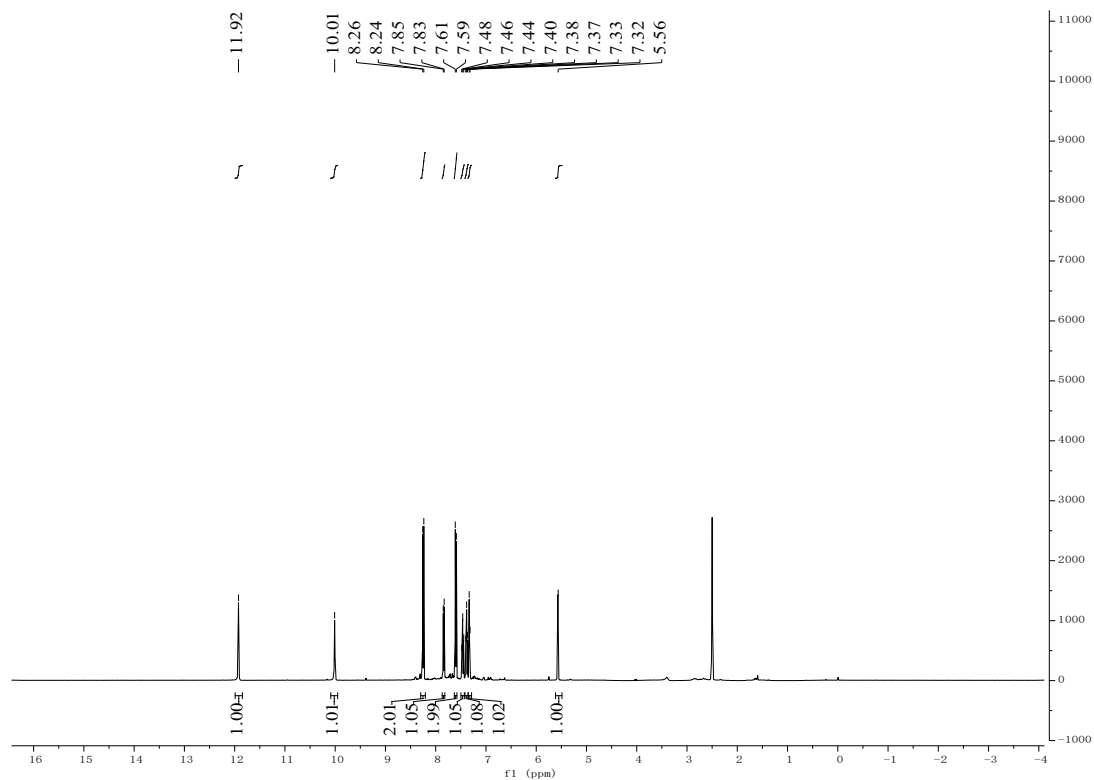

$^{13}\text{C}$  NMR (101 MHz, DMSO- $d_6$ )

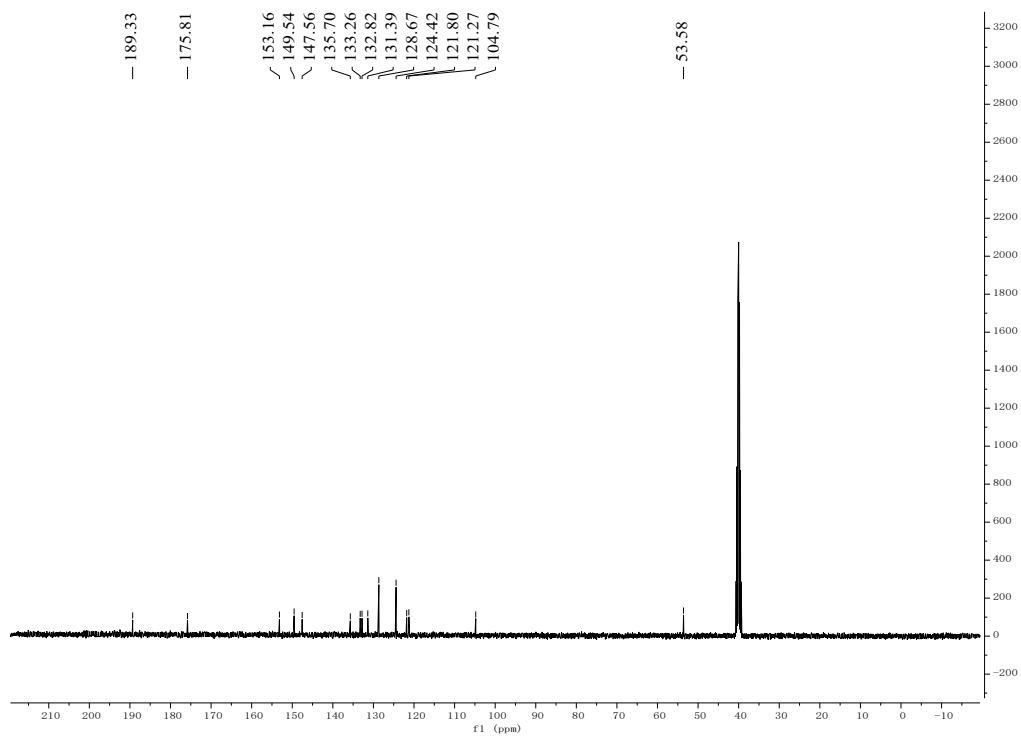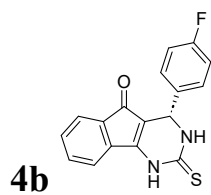

**<sup>1</sup>H NMR (400 MHz, DMSO-d<sub>6</sub>)**

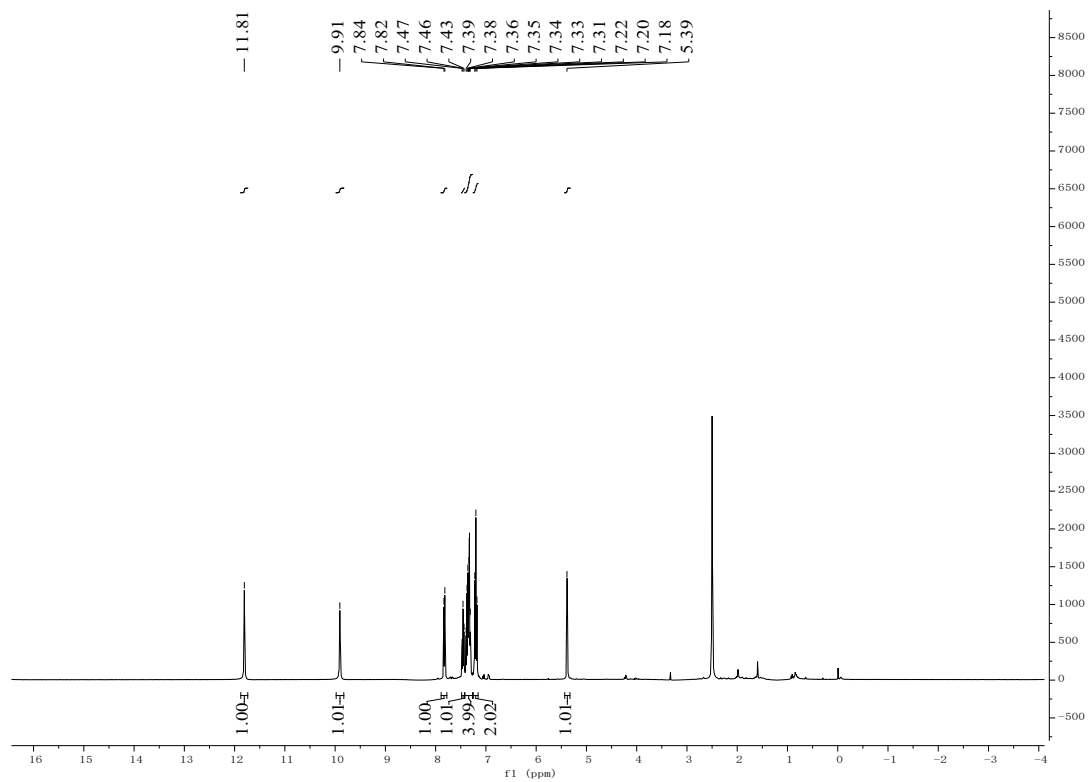

**<sup>13</sup>C NMR (101 MHz, DMSO-d<sub>6</sub>)**

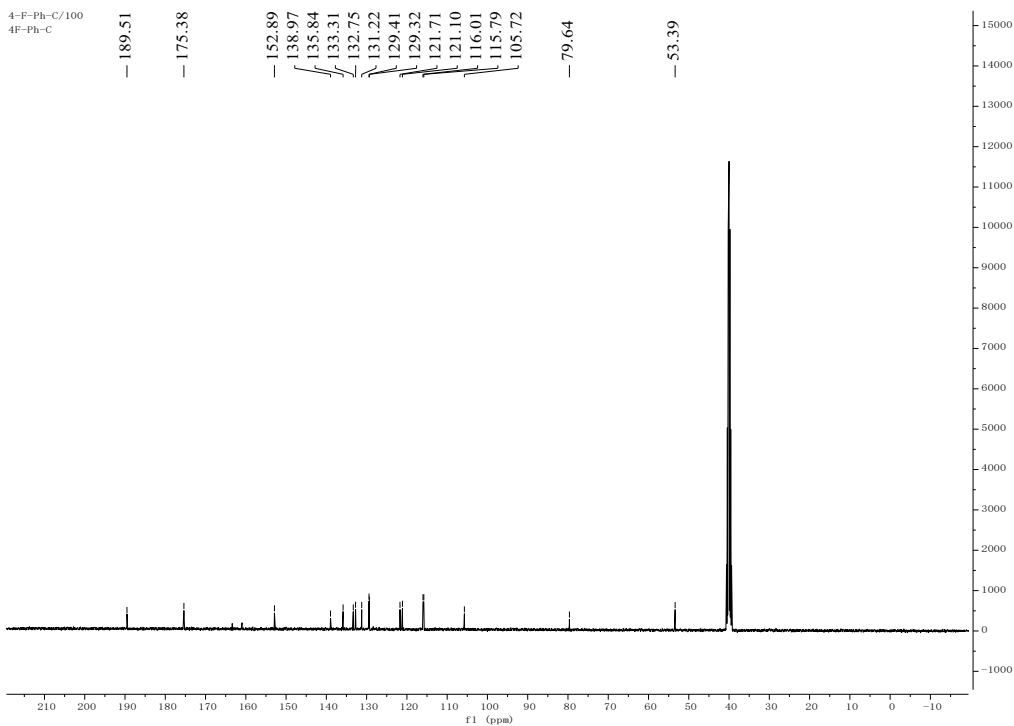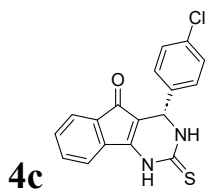

**<sup>1</sup>H NMR (400 MHz, DMSO-d<sub>6</sub>)**

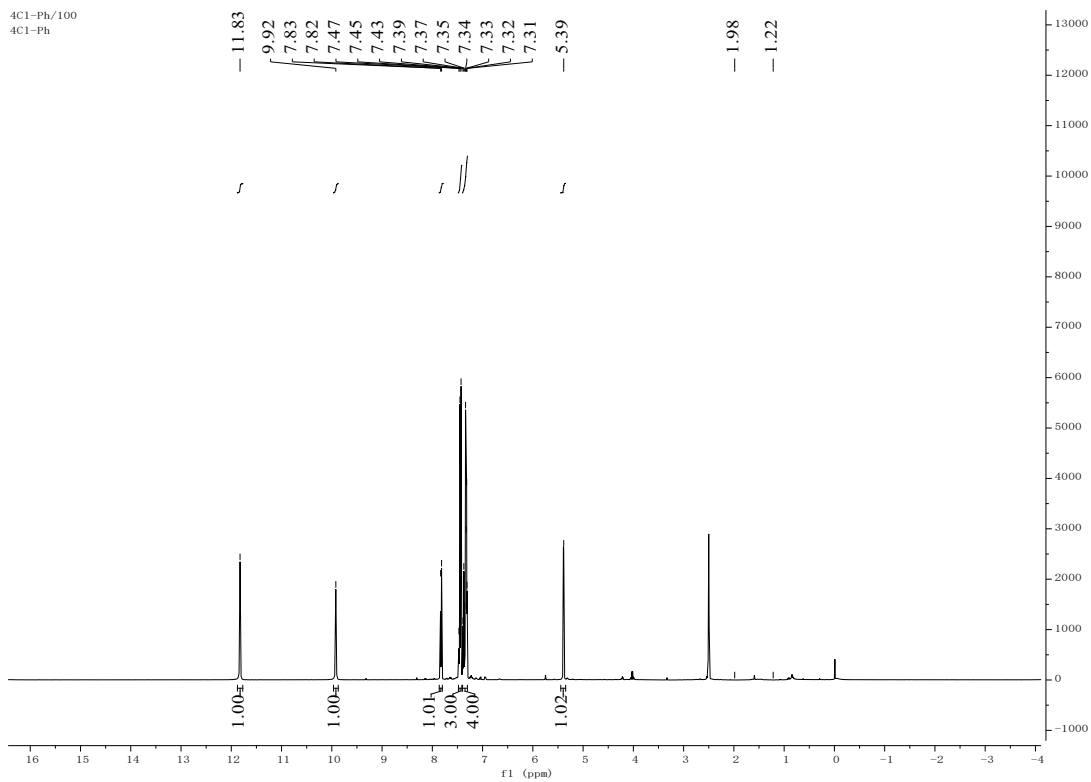



### <sup>13</sup>C NMR (101 MHz, DMSO-d6)

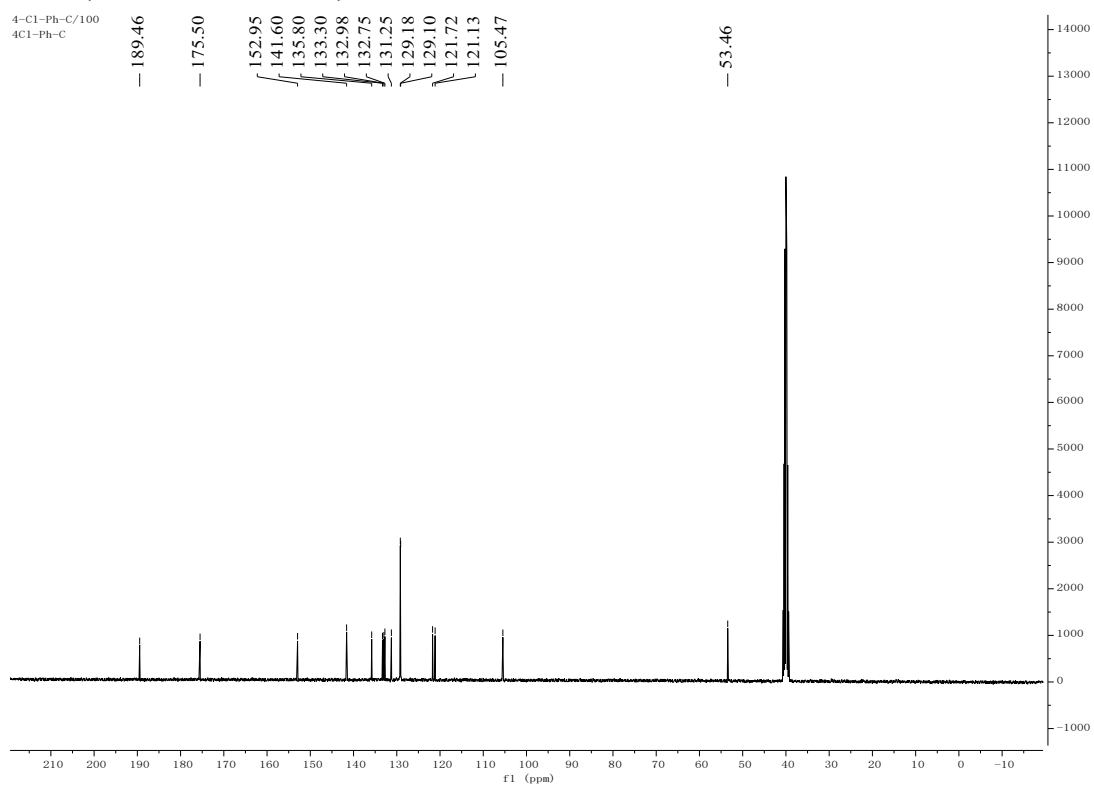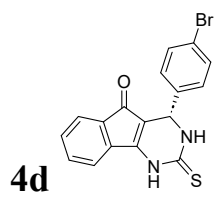

### <sup>1</sup>H NMR (400 MHz, DMSO-d6)

4-BrPh/100  
4-BrPh

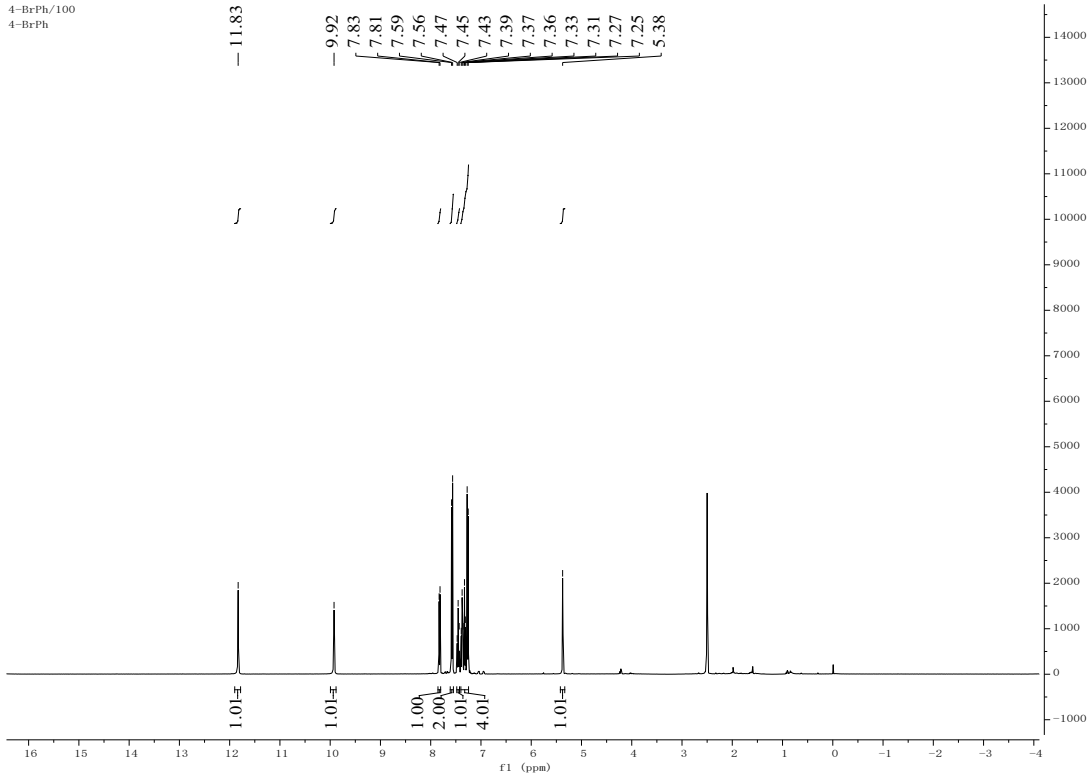

**<sup>13</sup>C NMR (101 MHz, DMSO-d6)**

4-Br-Ph-C/100  
4-BrPh-C

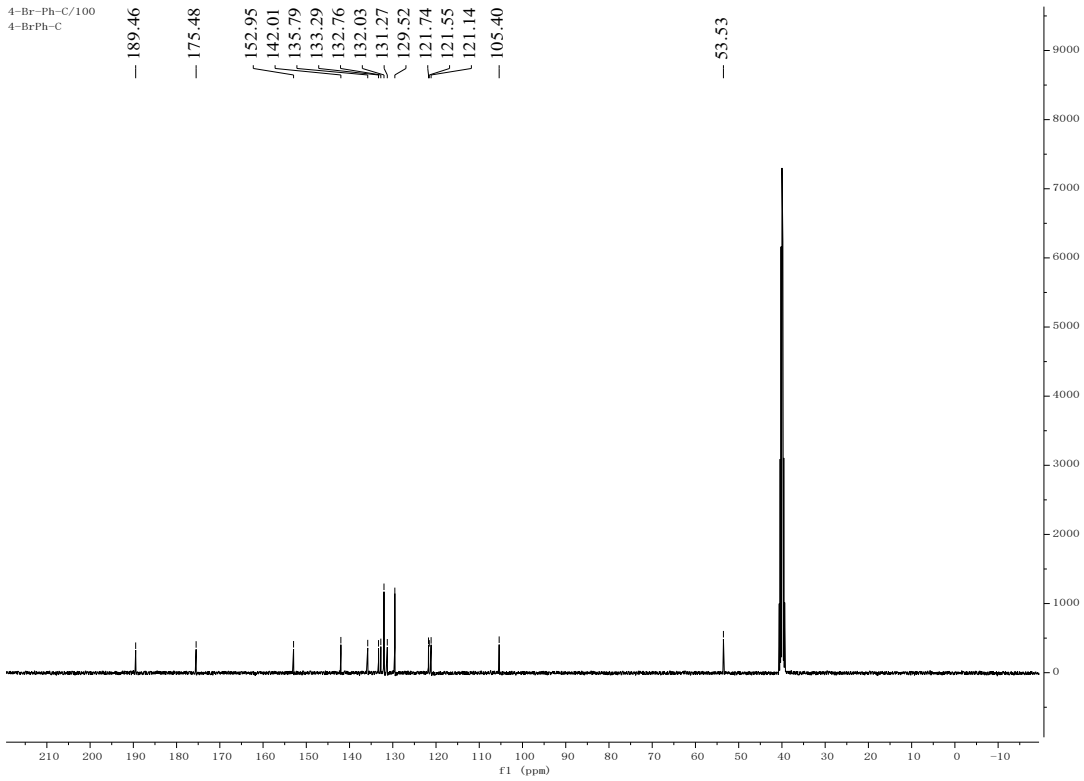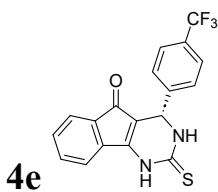

# <sup>1</sup>H NMR (400 MHz, DMSO-d6)

4-CF3Ph/100  
4-CF3Ph

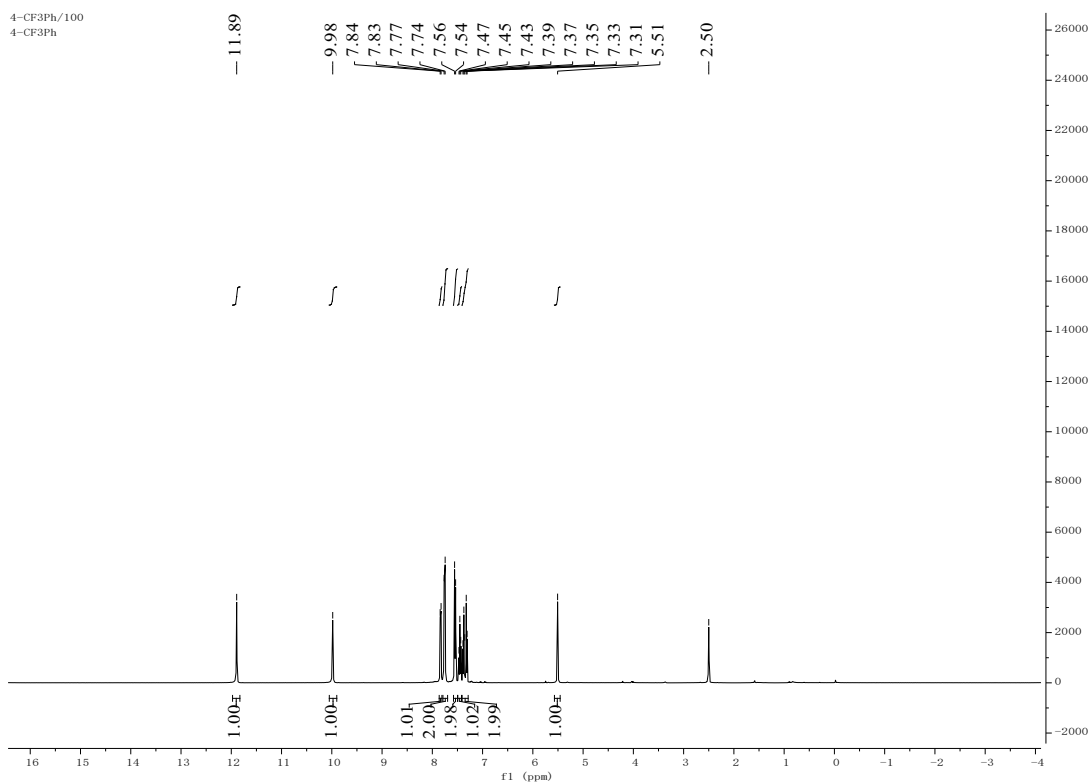

# <sup>13</sup>C NMR (101 MHz, DMSO-d6)

4-CF3-Ph-C/100  
4-CF3Ph-C

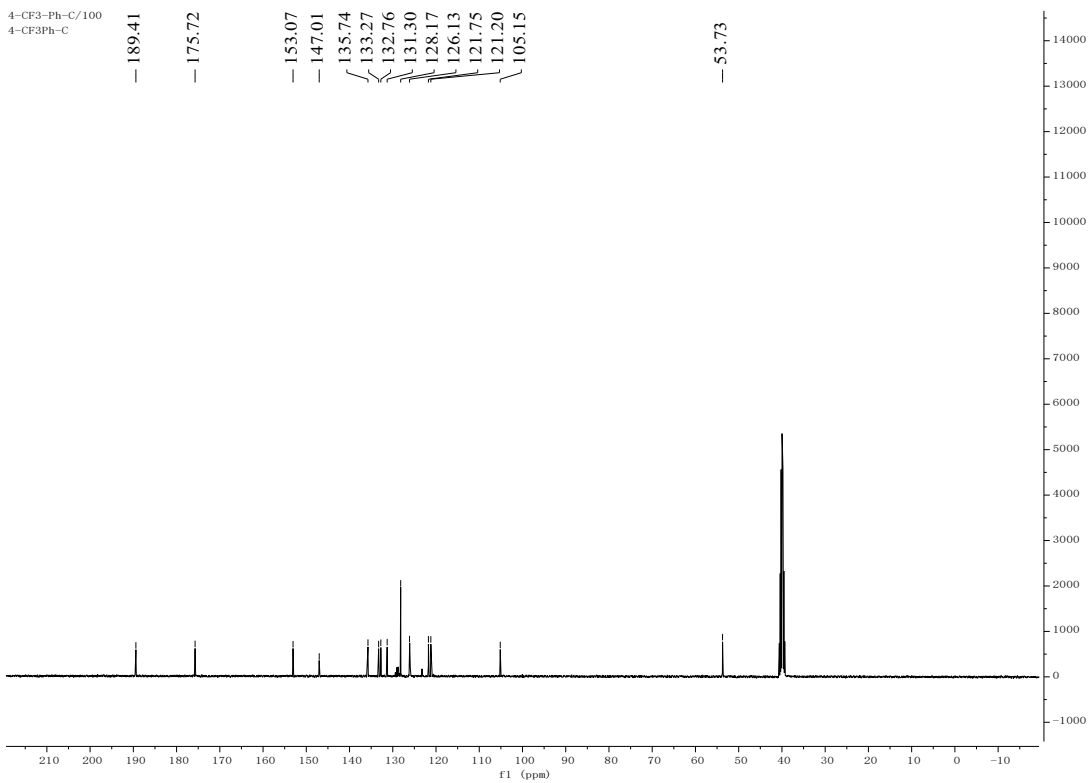

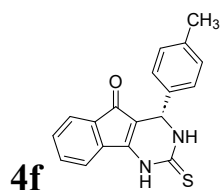

**<sup>1</sup>H NMR (400 MHz, DMSO-d<sub>6</sub>)**

4-ch3-ph-h-dms0/101  
fjy20231223-1

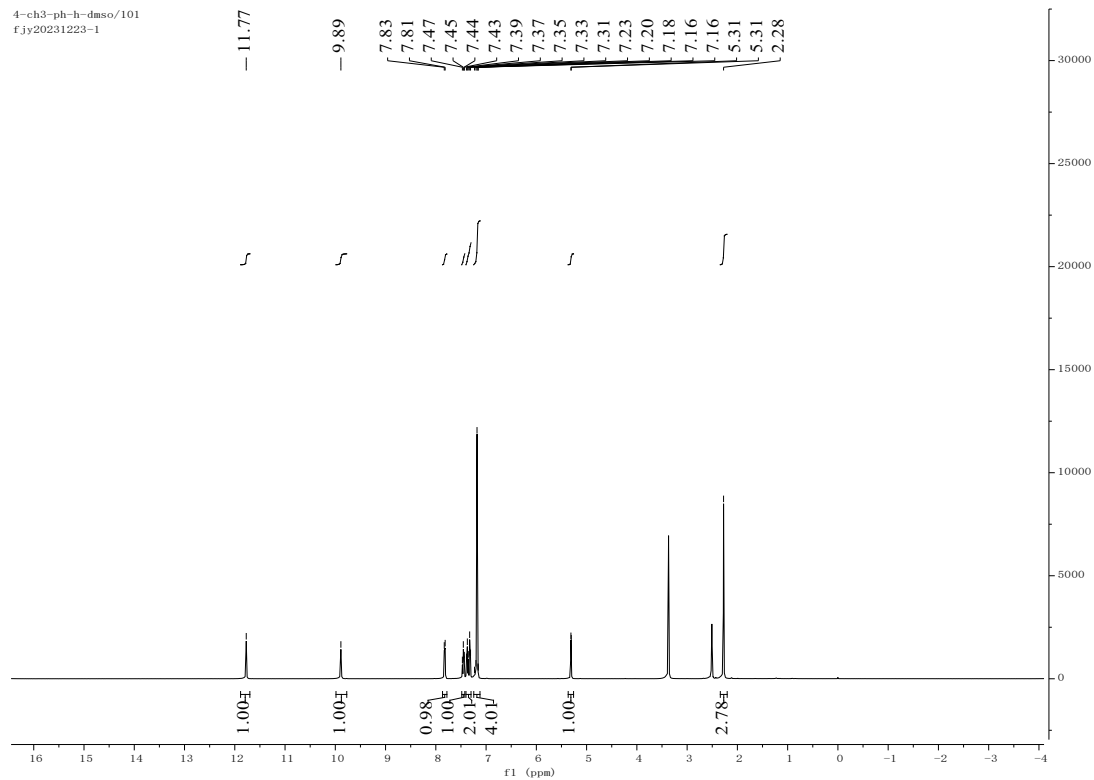

**<sup>13</sup>C NMR (101 MHz, DMSO-d<sub>6</sub>)**

k1k-ph-4ch3/101  
1

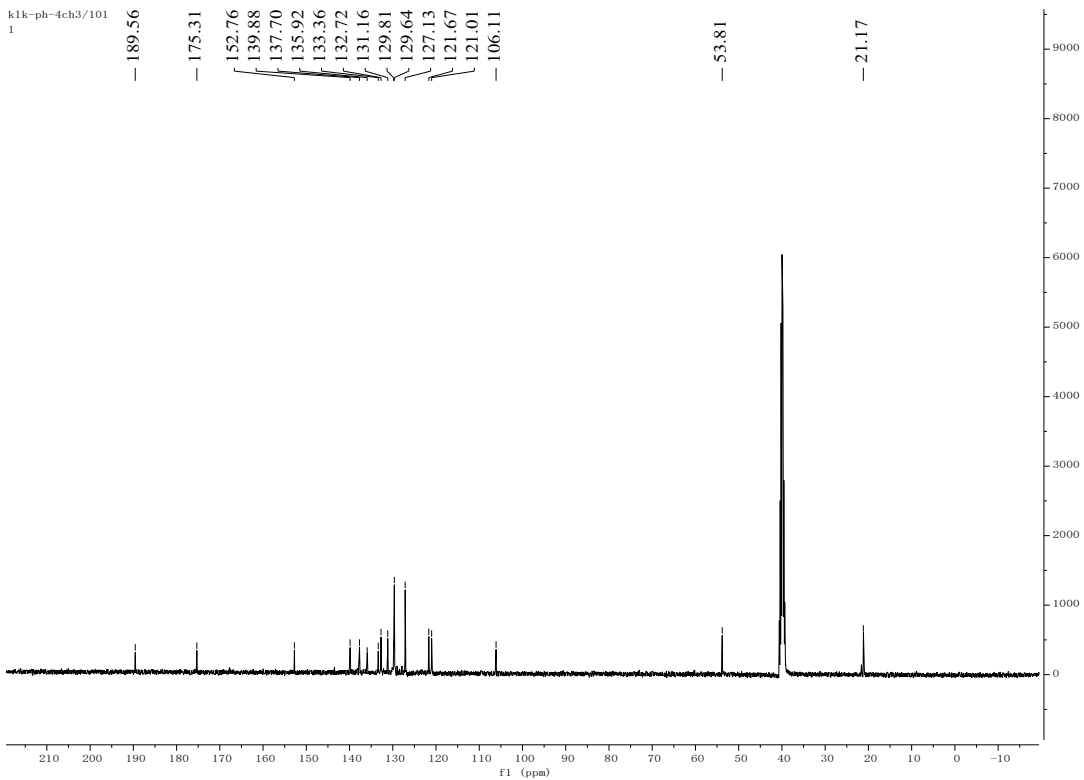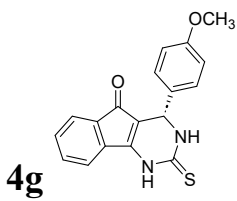

**<sup>1</sup>H NMR (400 MHz, DMSO-d<sub>6</sub>)**

4-och3-ph/100  
20231017-ycm

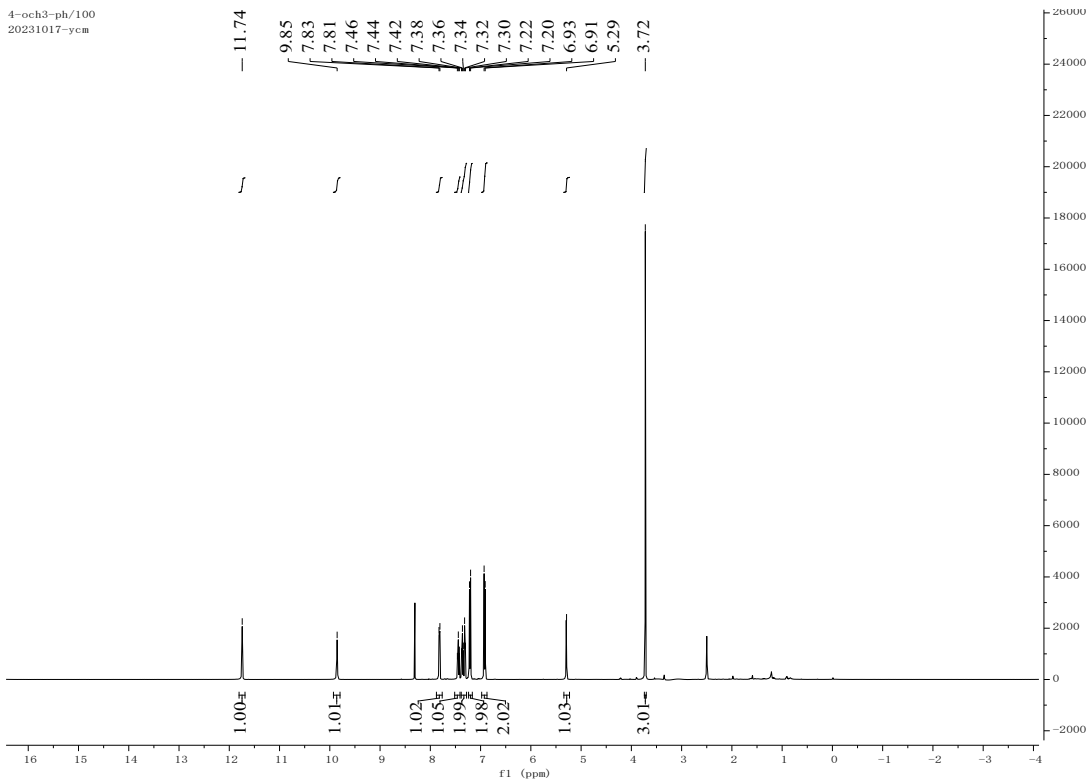

### <sup>13</sup>C NMR (101 MHz, DMSO-d6)

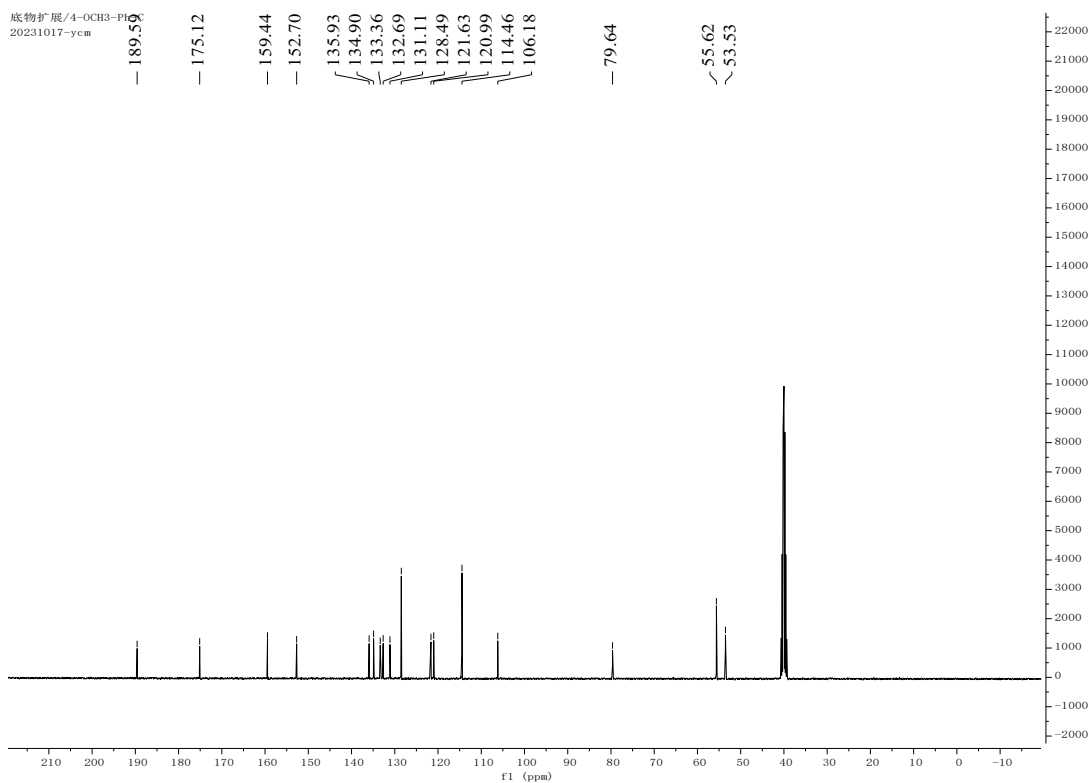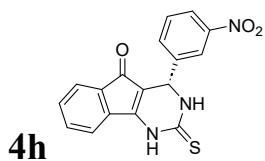

### <sup>1</sup>H NMR (400 MHz, DMSO-d6)

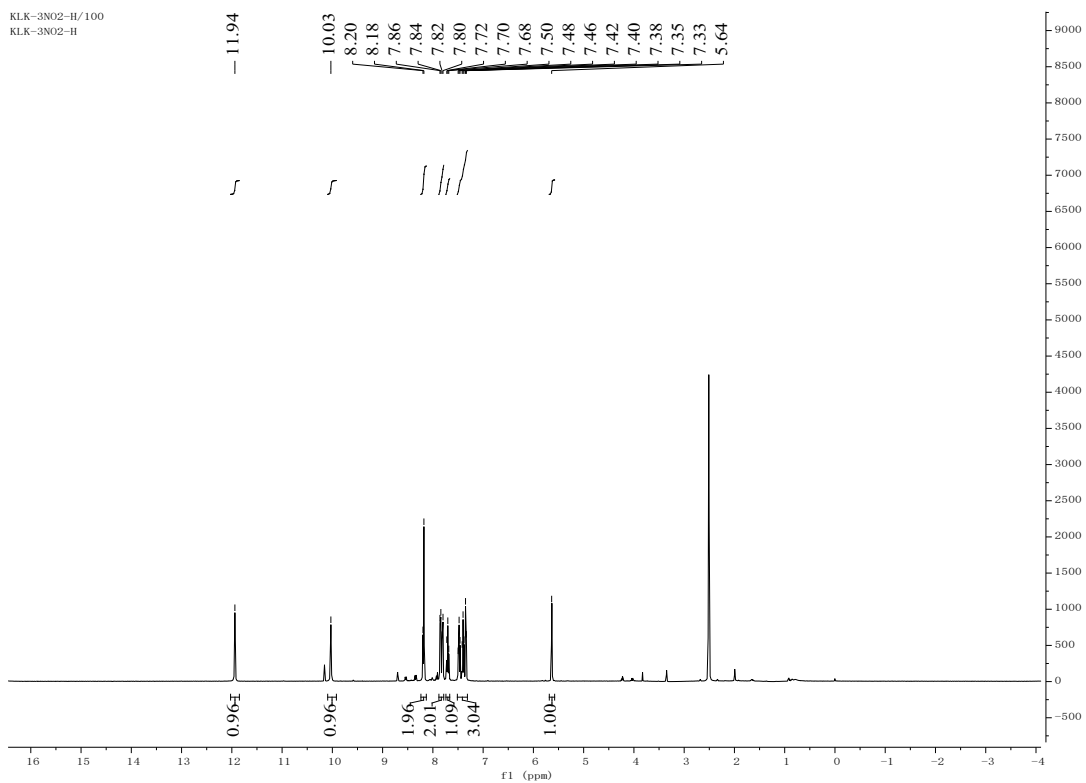

### <sup>13</sup>C NMR (101 MHz, DMSO-d6)

KLK-3N02-C/100  
KLK-3N02-C

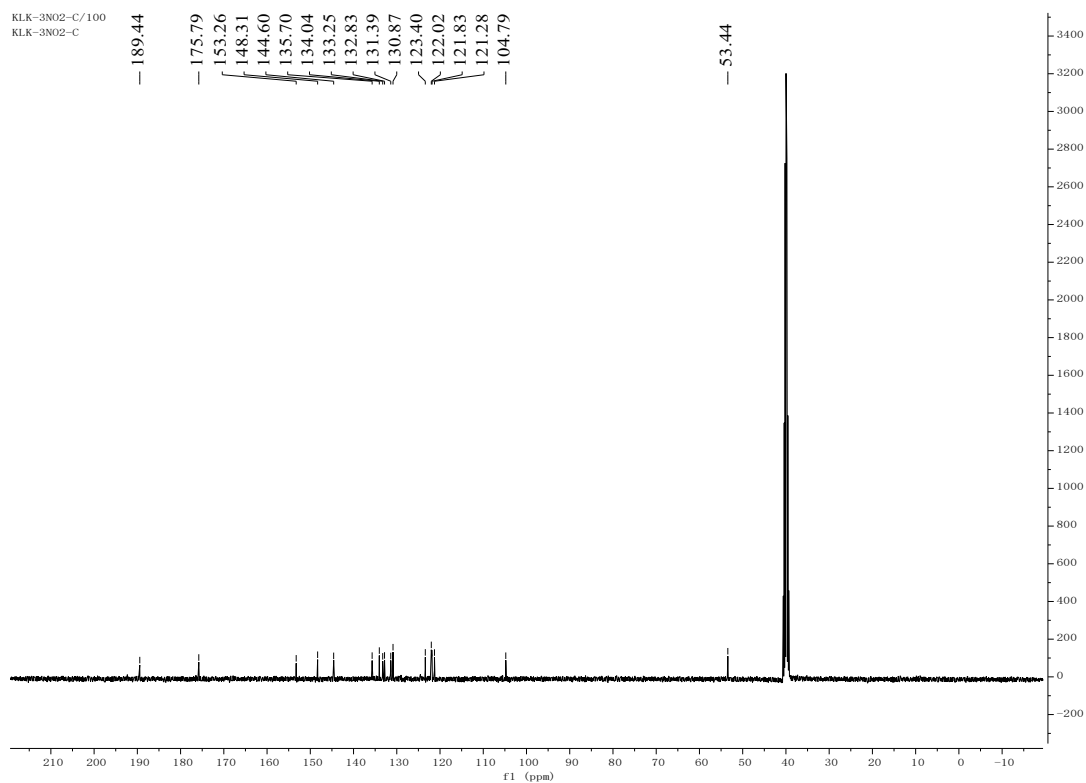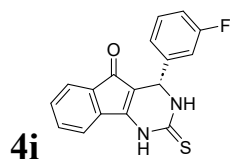

### <sup>1</sup>H NMR (400 MHz, DMSO-d6)

3-F-Ph/100  
3-F-Ph

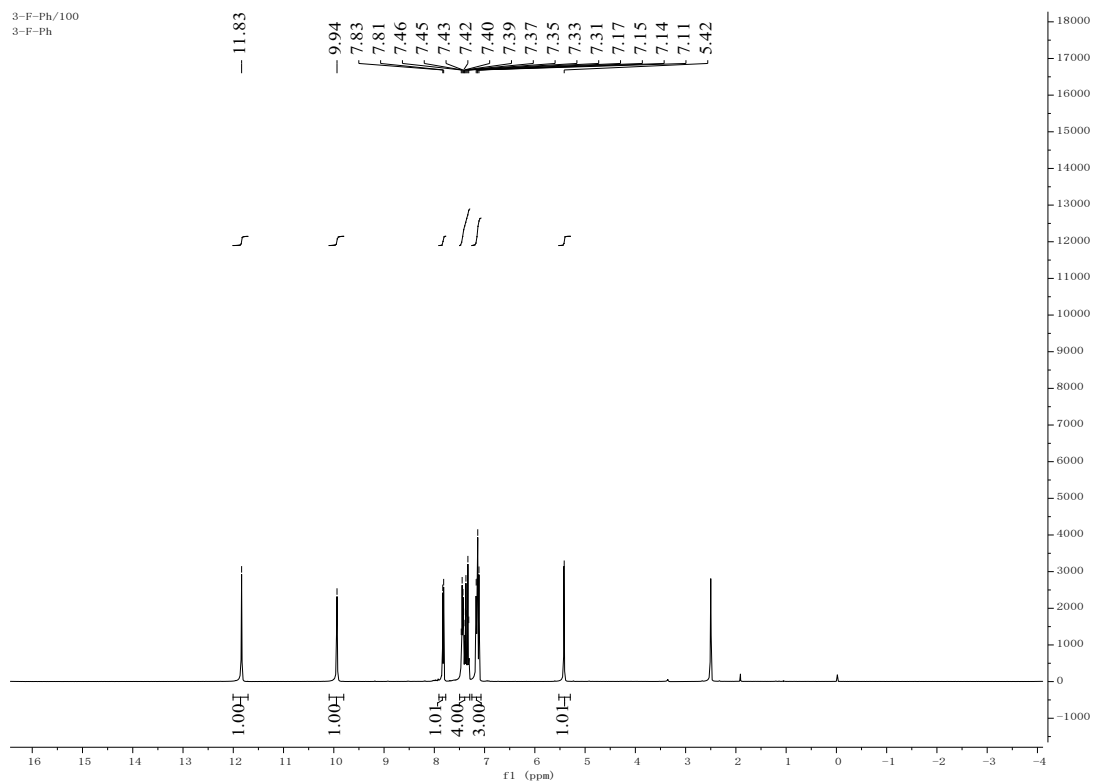

**<sup>13</sup>C NMR (101 MHz, DMSO-d6)**

3-F-Ph-C/100  
3-F-Ph-c

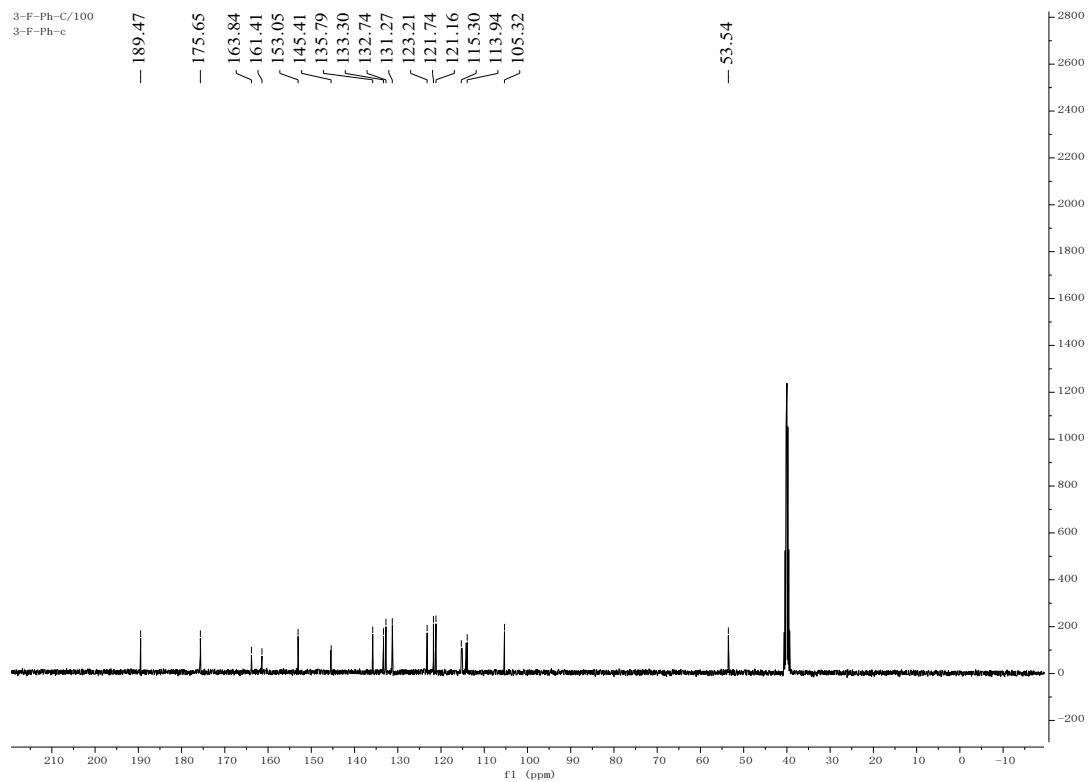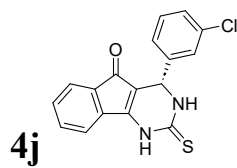

**<sup>1</sup>H NMR (400 MHz, DMSO-d6)**



3-c1-ph-2/100  
1s-2023-1118-6

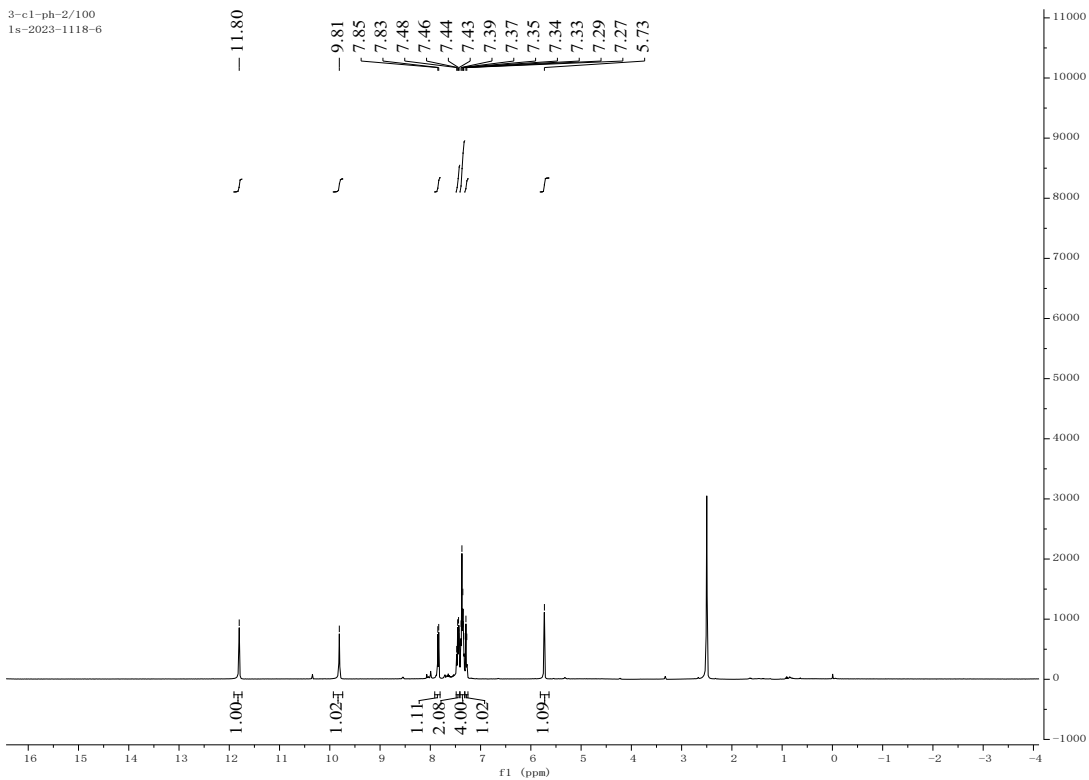

### <sup>13</sup>C NMR (101 MHz, DMSO-d6)

3-c1-ph-2/101  
1s-2023-1118-6

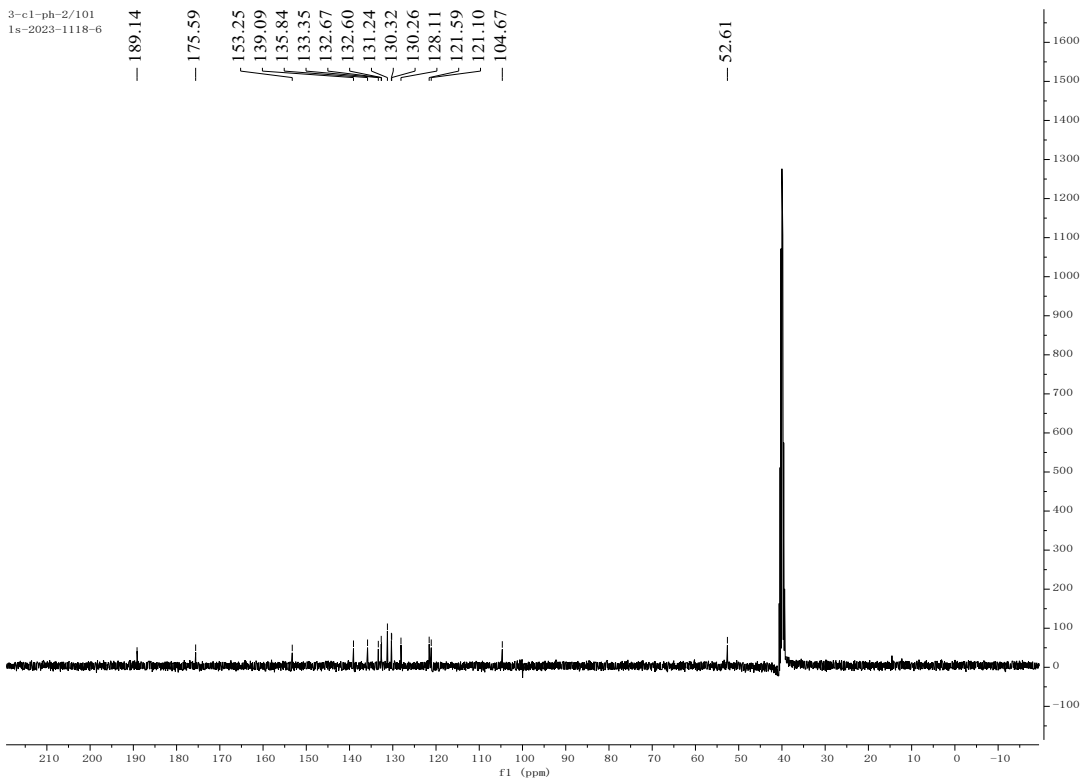

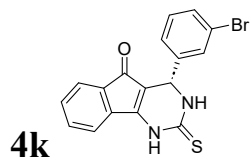

**<sup>1</sup>H NMR (400 MHz, DMSO-d<sub>6</sub>)**

3-Br-Ph-k1k/200  
3-Br-Ph-k1k

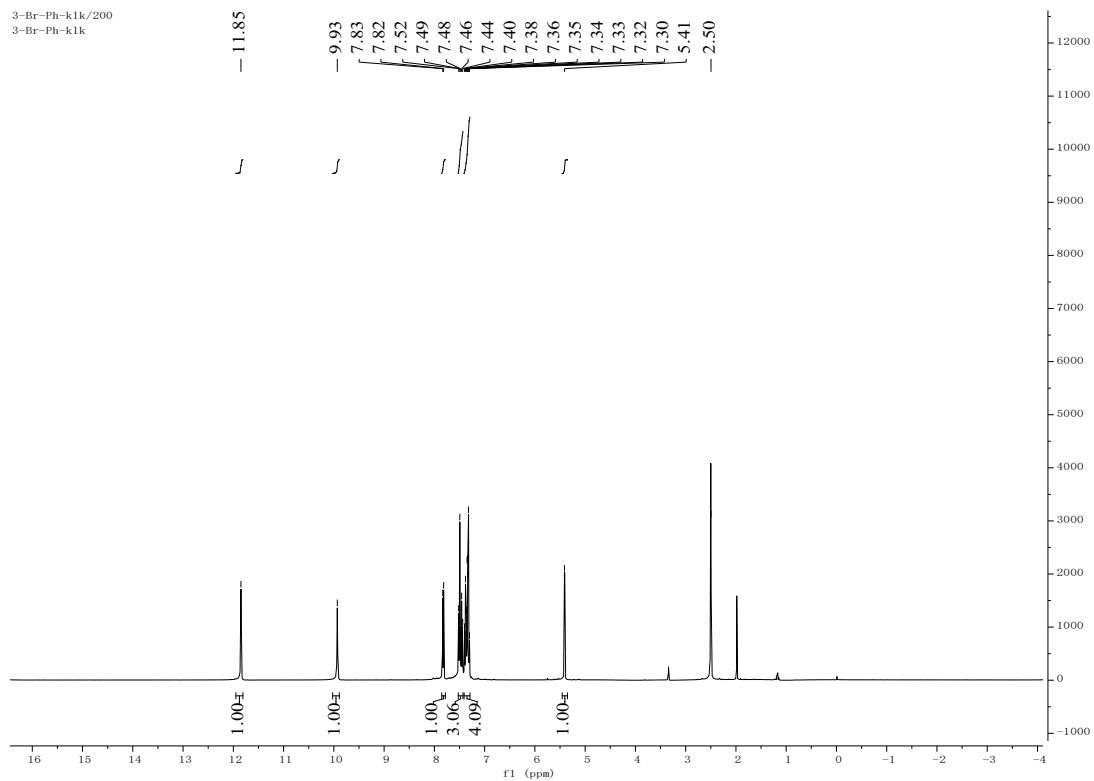

**<sup>13</sup>C NMR (101 MHz, DMSO-d<sub>6</sub>)**

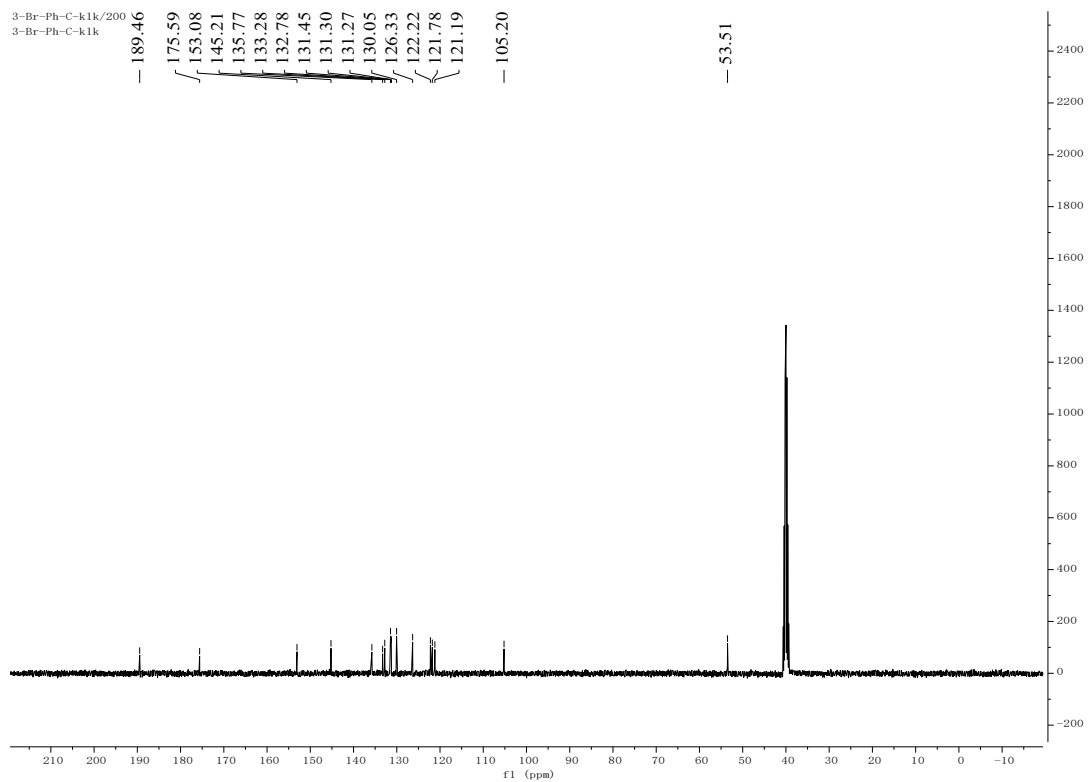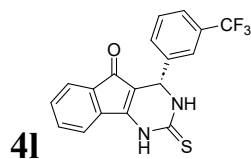

**<sup>1</sup>H NMR (400 MHz, DMSO-d<sub>6</sub>)**

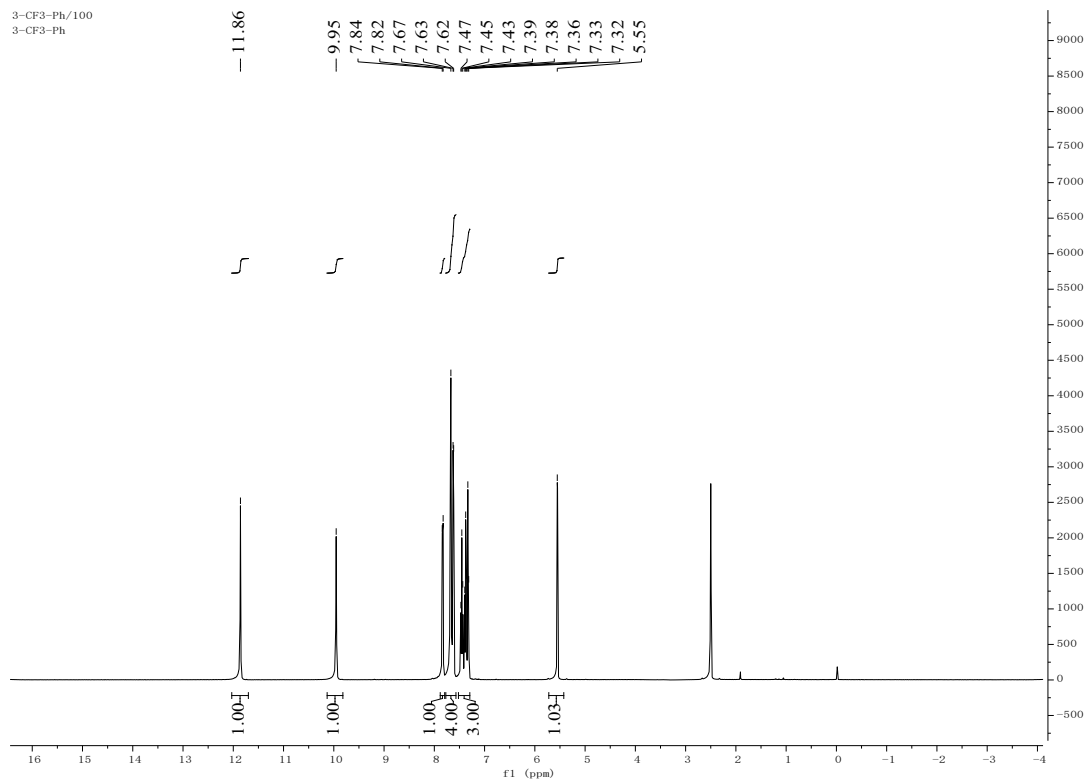

**<sup>13</sup>C NMR (101 MHz, DMSO-d<sub>6</sub>)**

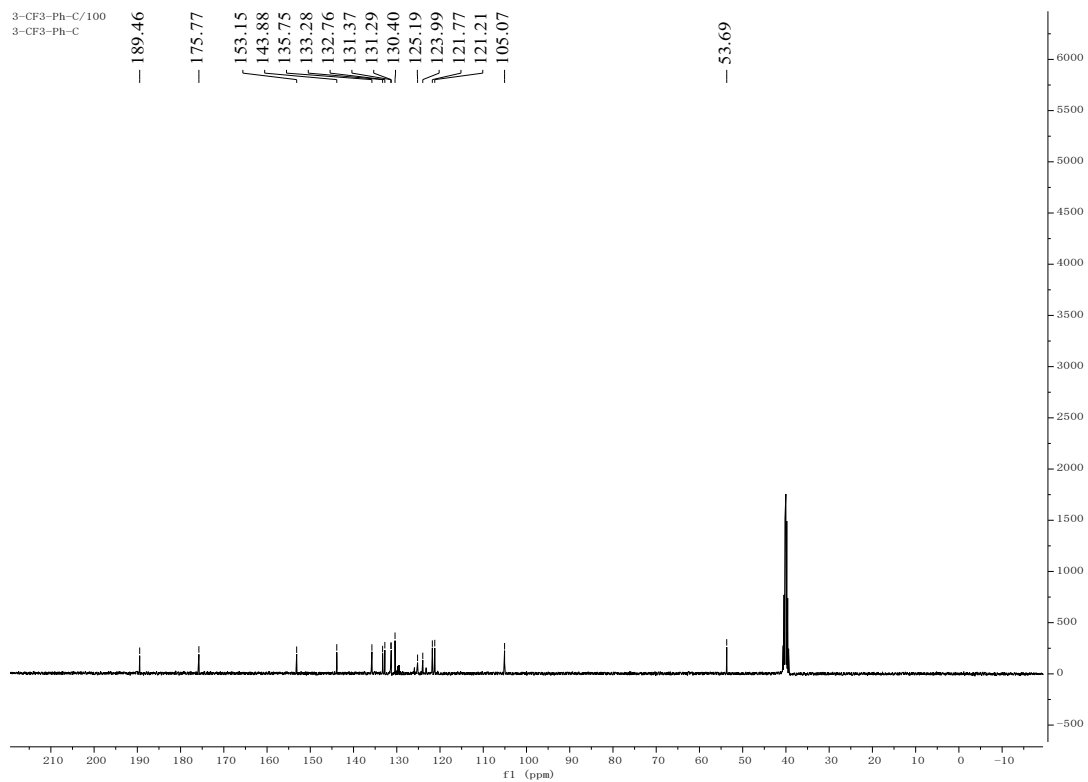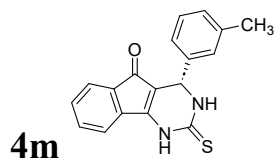

**<sup>1</sup>H NMR (400 MHz, DMSO-d6)**

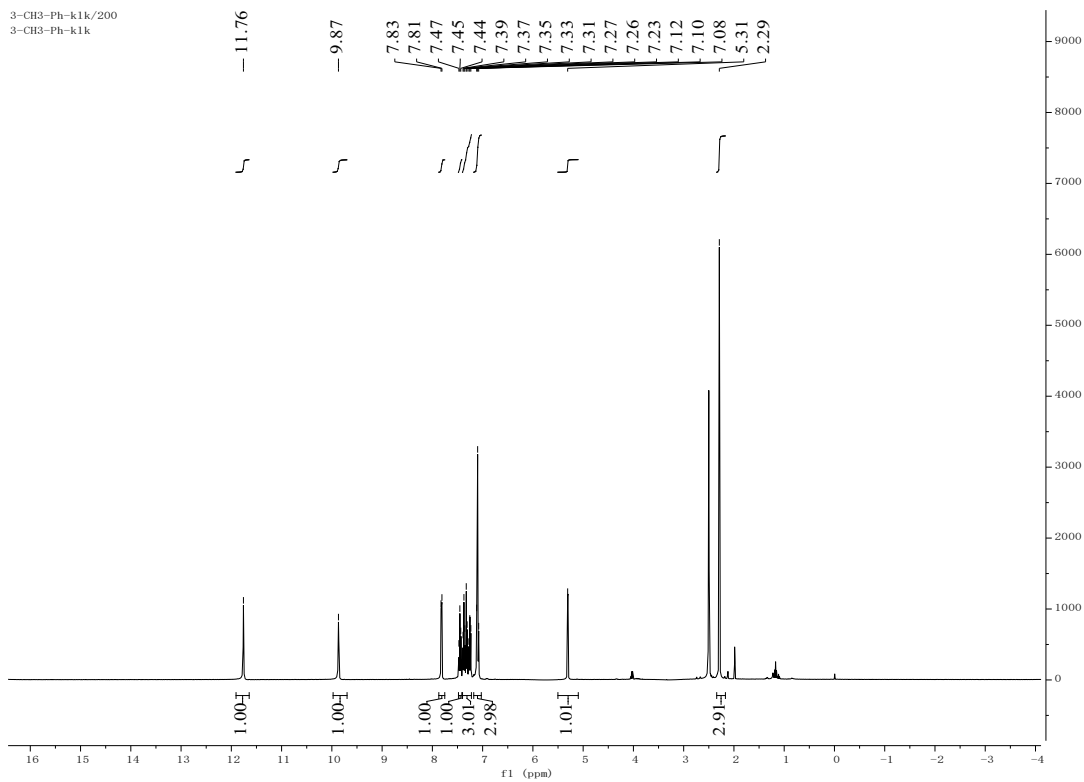

**<sup>13</sup>C NMR (101 MHz, DMSO-d6)**

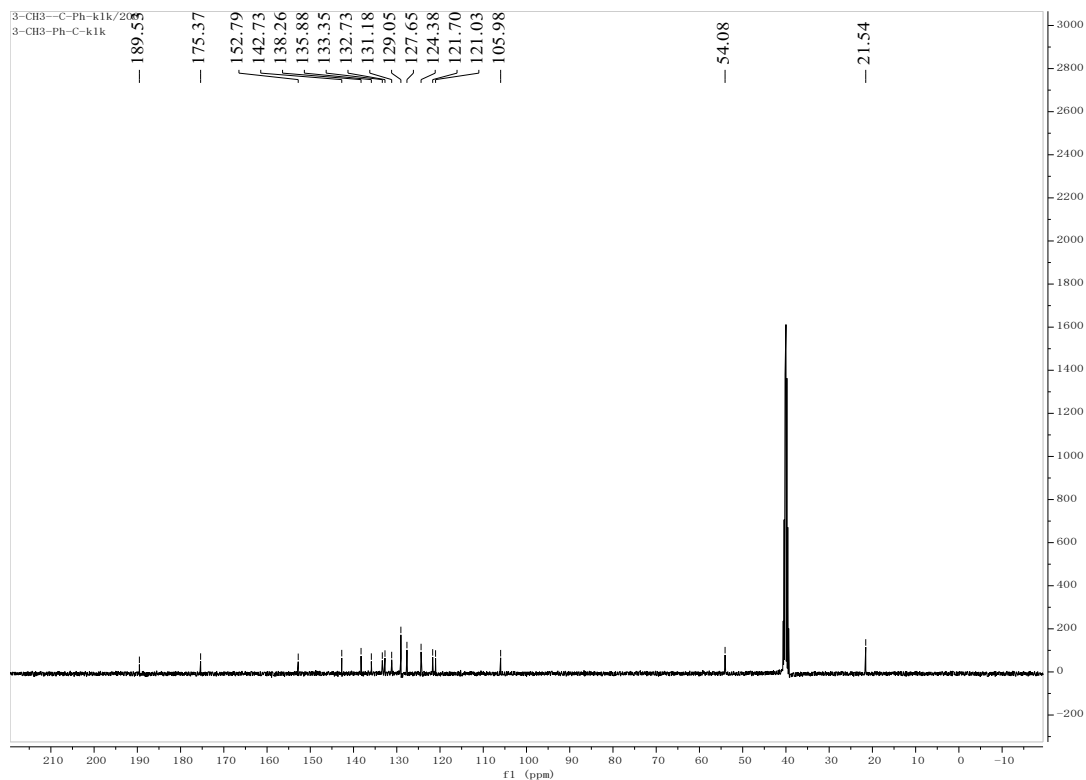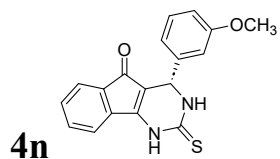

**<sup>1</sup>H NMR (400 MHz, DMSO-d<sub>6</sub>)**

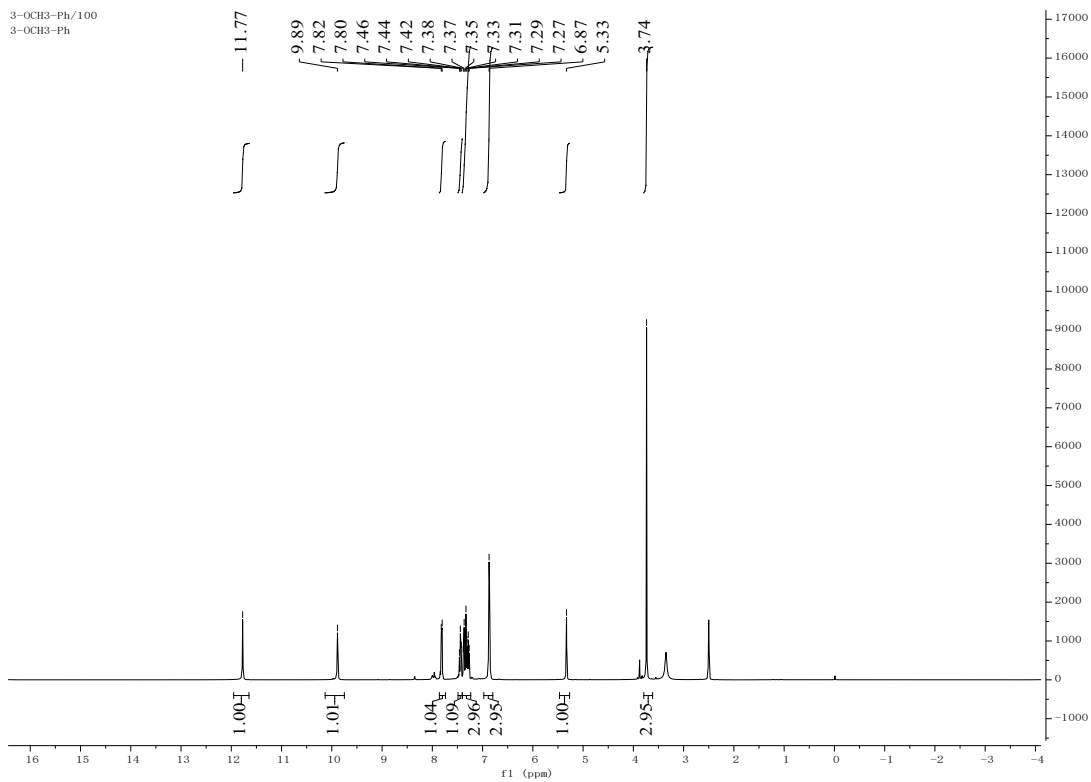

**<sup>13</sup>C NMR (101 MHz, DMSO-d<sub>6</sub>)**

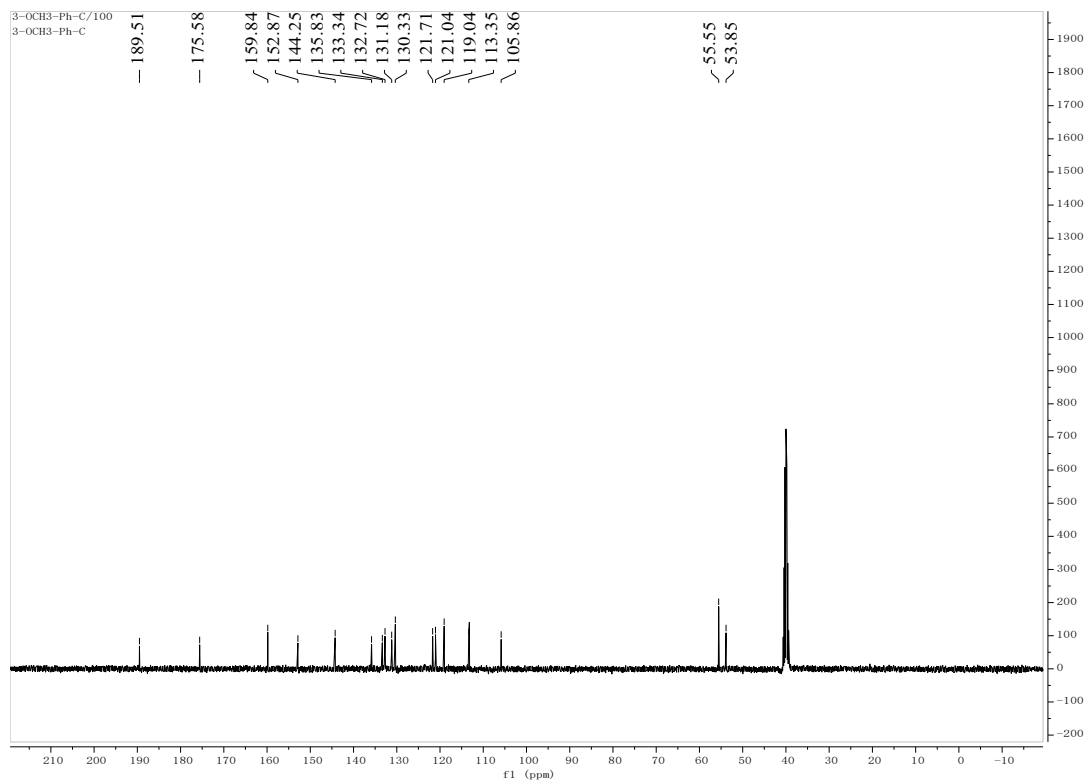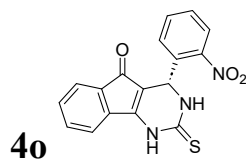

**<sup>1</sup>H NMR (400 MHz, DMSO-d<sub>6</sub>)**

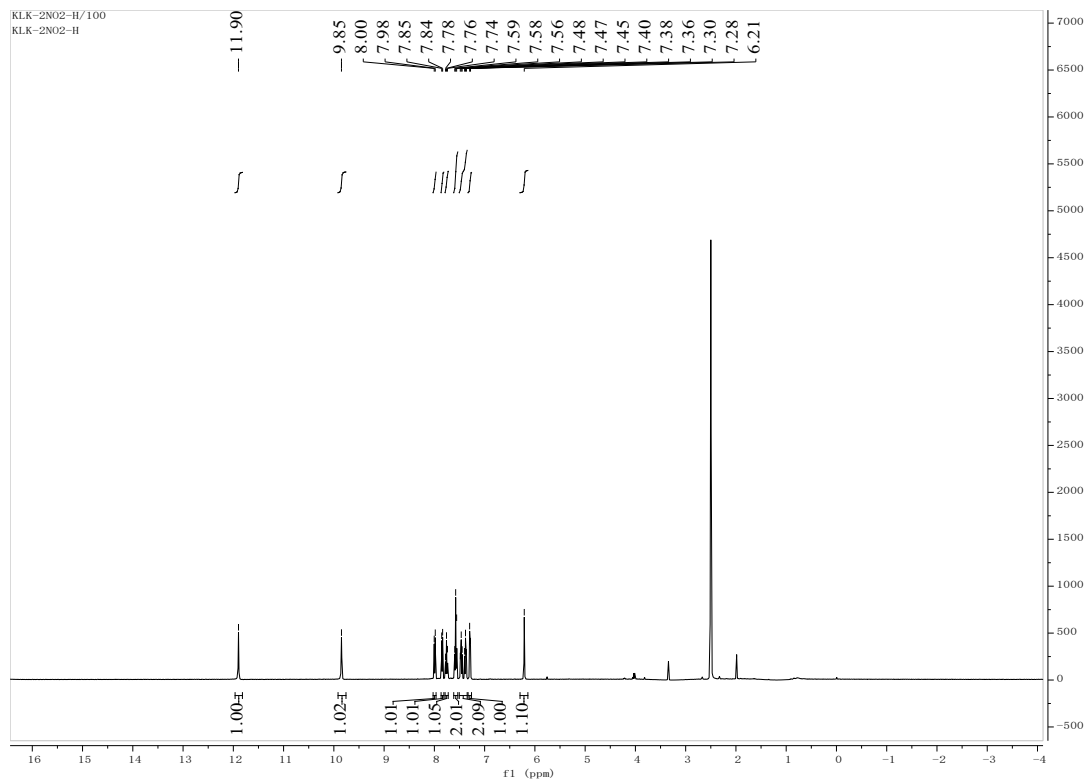

**<sup>13</sup>C NMR (101 MHz, DMSO-d<sub>6</sub>)**

KLK-2N02-C/100  
KLK-2N02-C

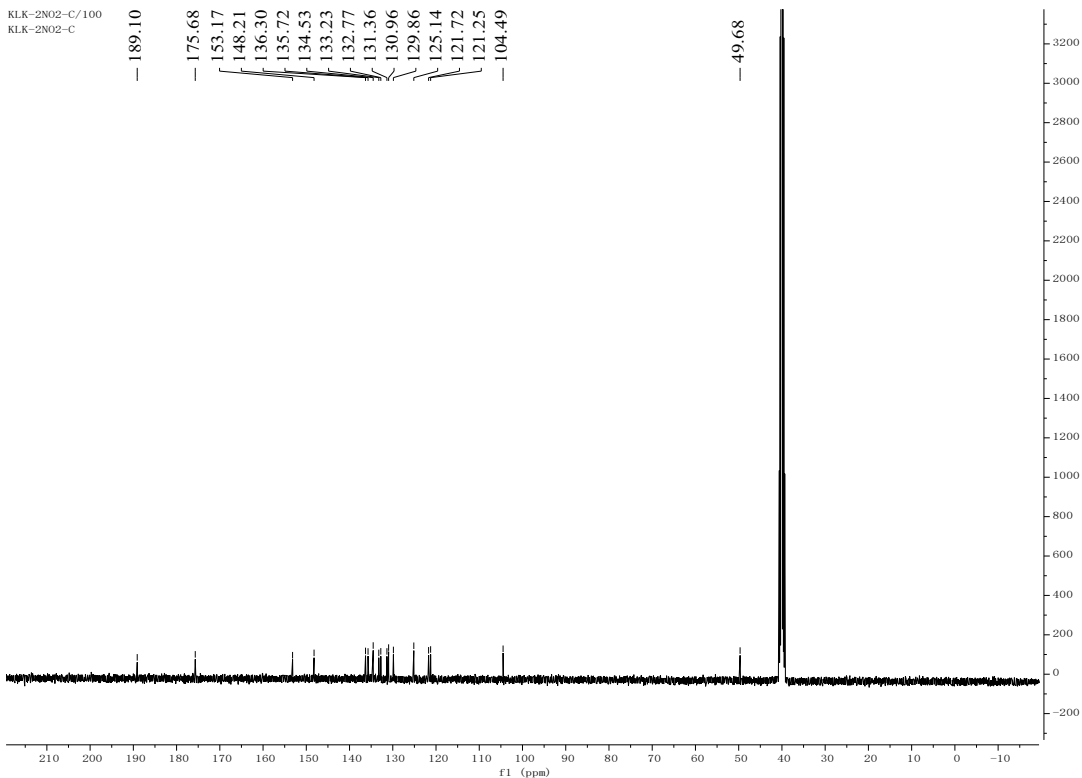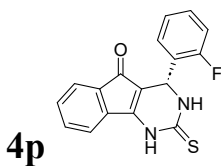

**<sup>1</sup>H NMR (400 MHz, DMSO-d<sub>6</sub>)**

klk20240318-2f/100  
ZSJ-1117-114

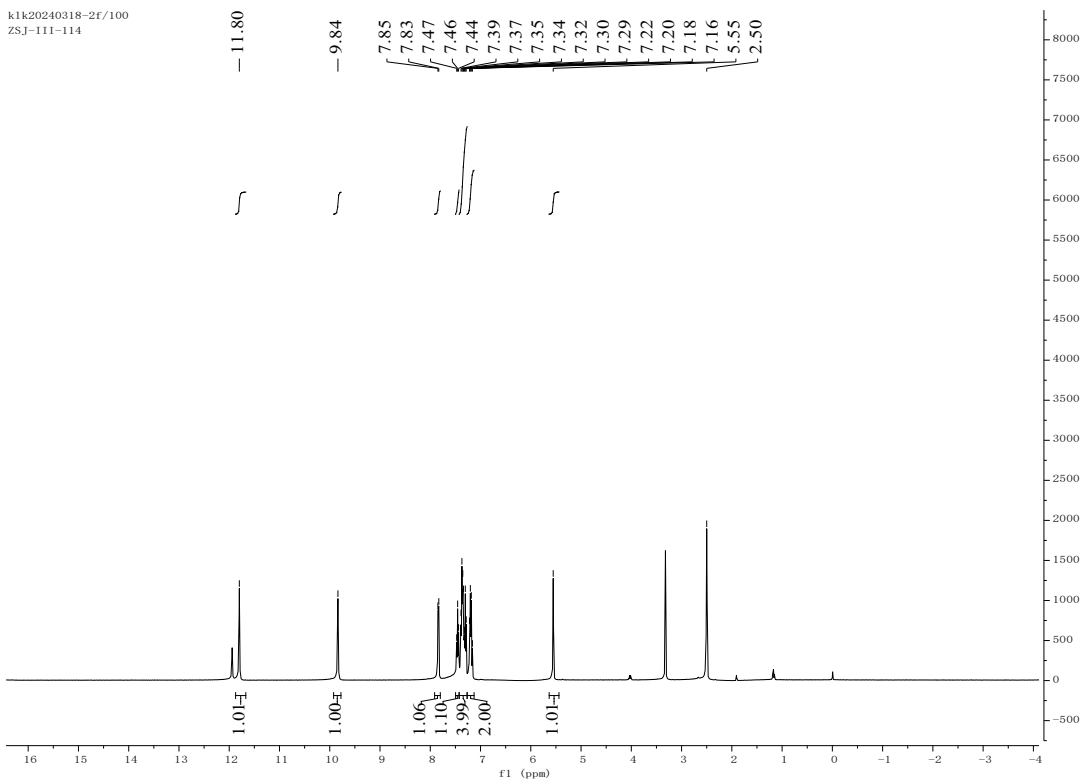

**<sup>13</sup>C NMR (101 MHz, DMSO-d<sub>6</sub>)**

k1k20240318-2f/101  
ZSJ-111-114

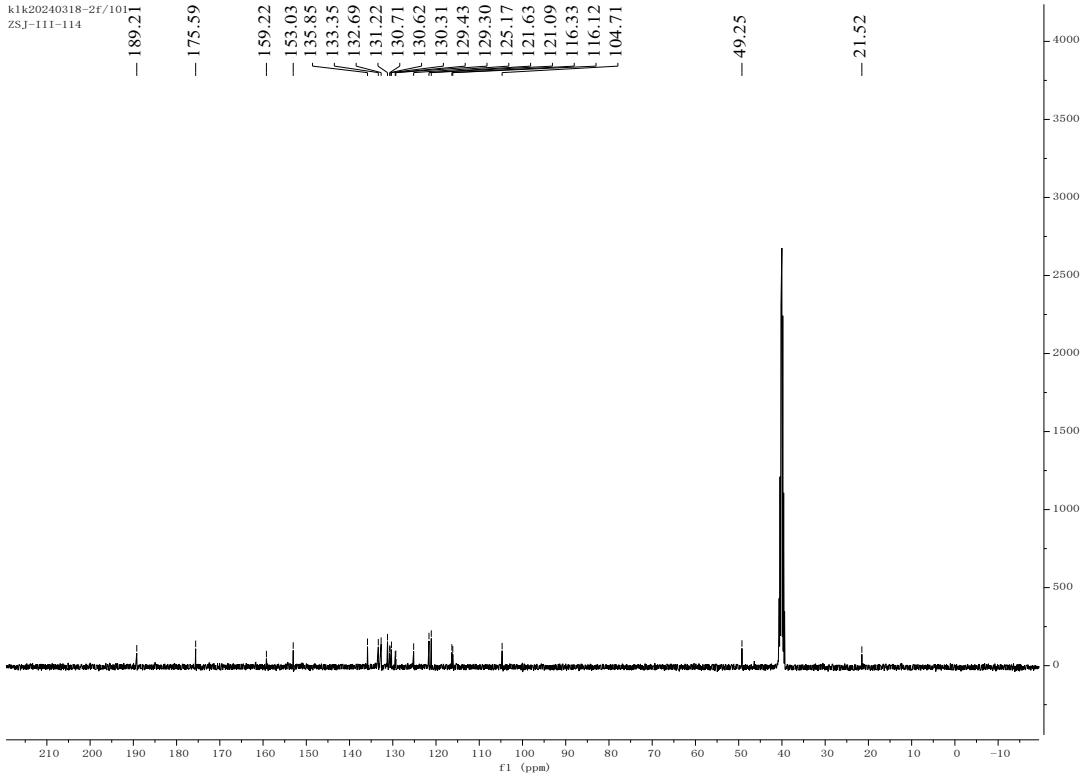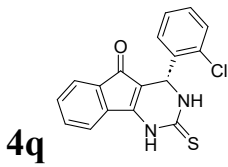

**<sup>1</sup>H NMR (400 MHz, DMSO-d<sub>6</sub>)**

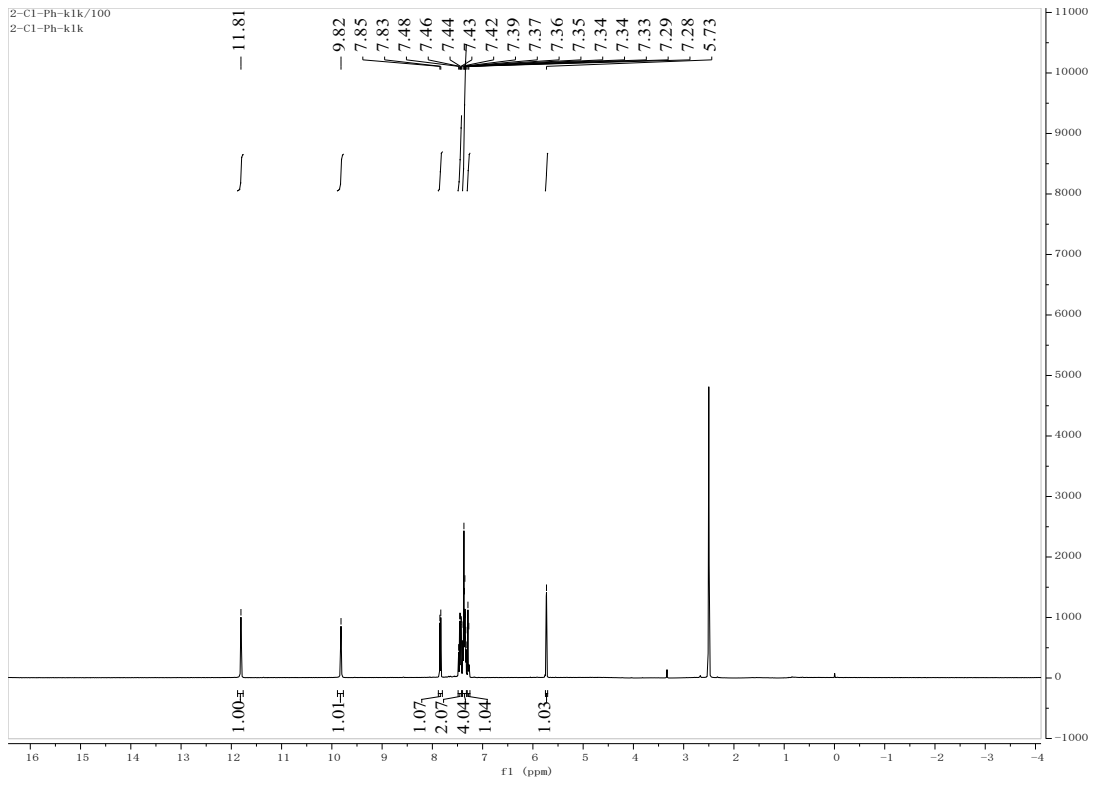



### <sup>13</sup>C NMR (101 MHz, DMSO-d6)

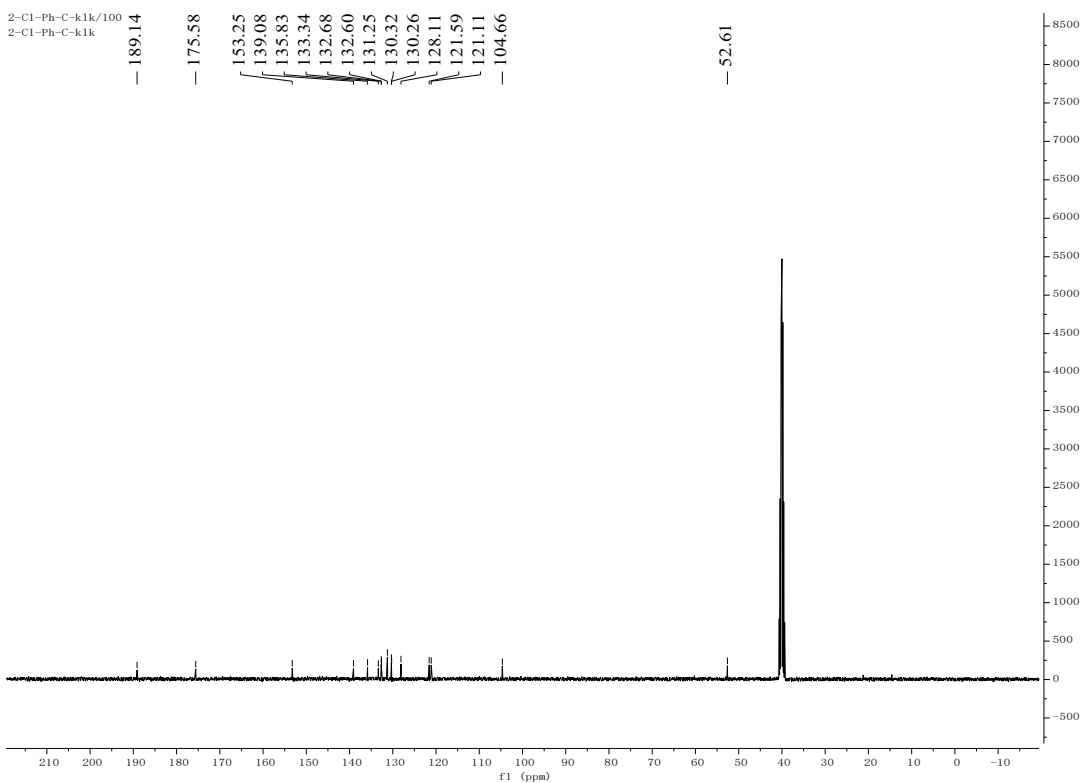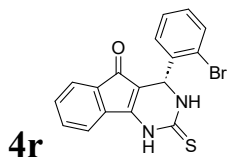

### <sup>1</sup>H NMR (400 MHz, DMSO-d6)

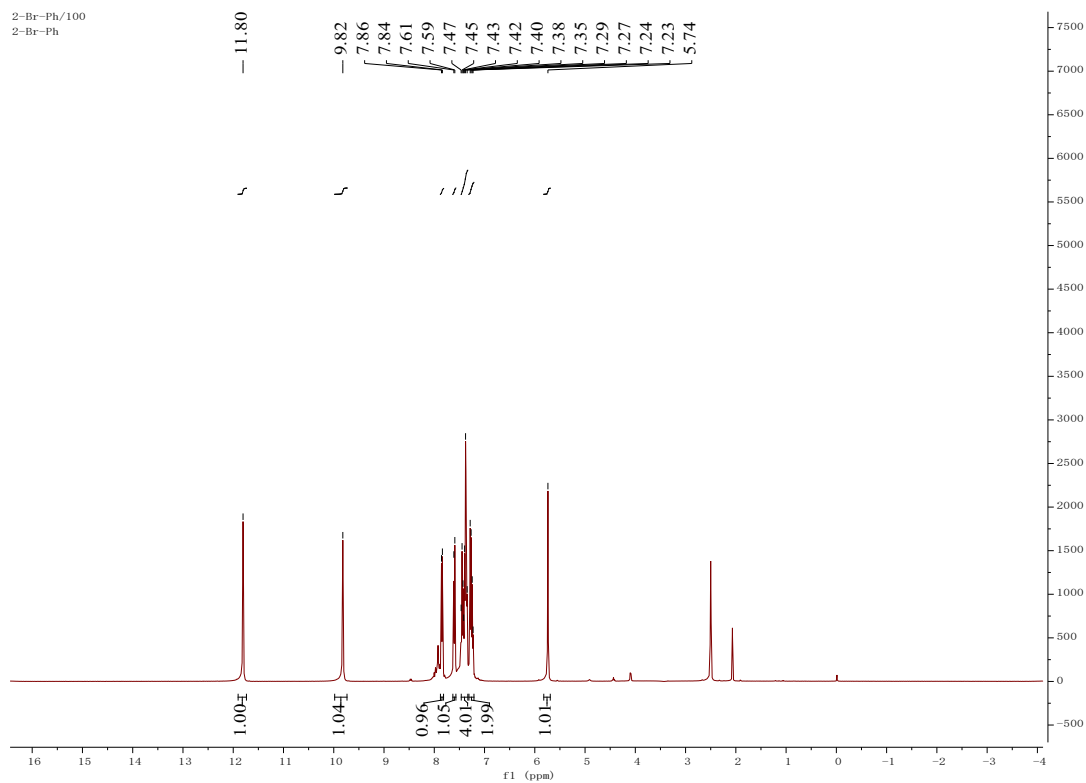

### <sup>13</sup>C NMR (101 MHz, DMSO-d<sub>6</sub>)

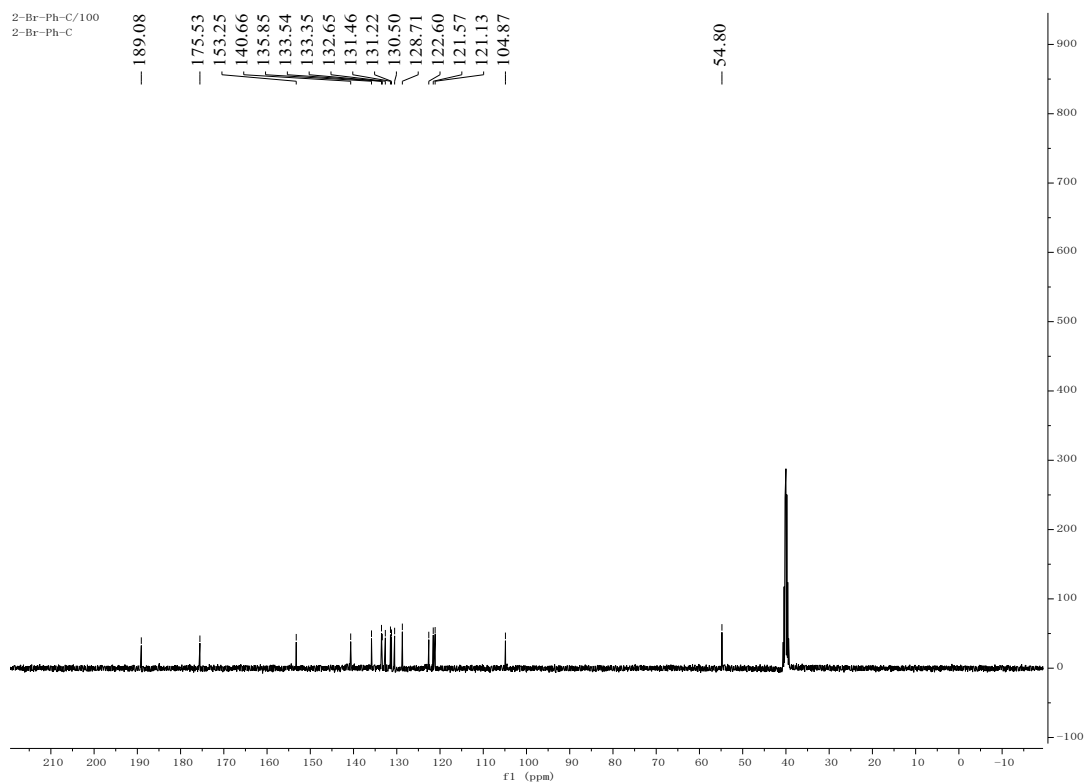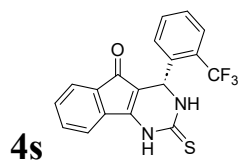

### <sup>1</sup>H NMR (400 MHz, DMSO-d<sub>6</sub>)

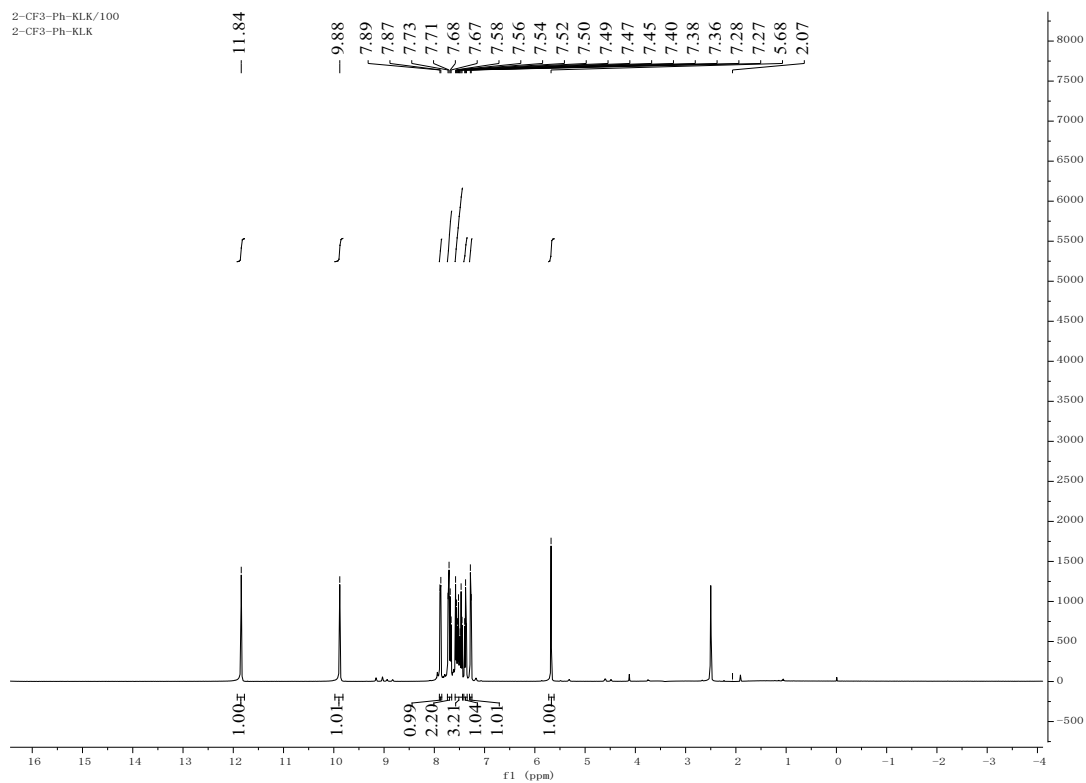

### <sup>13</sup>C NMR (101 MHz, DMSO-d6)

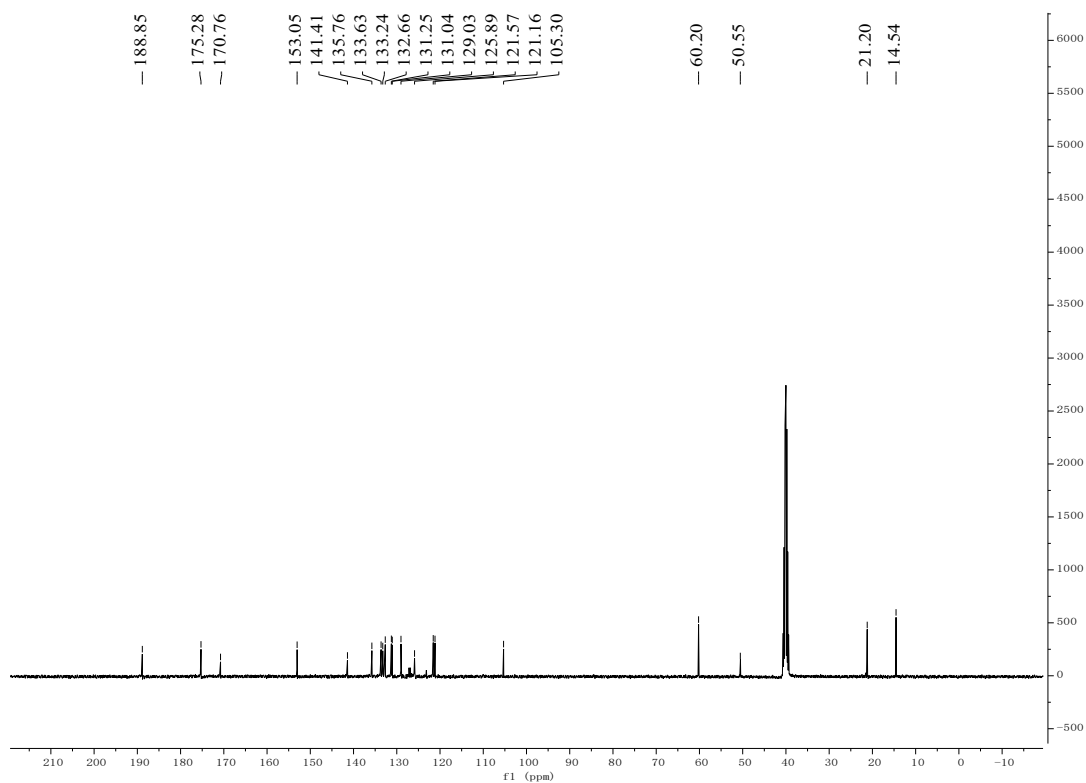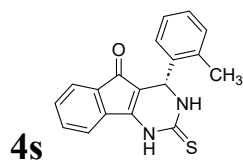

### <sup>1</sup>H NMR (400 MHz, DMSO-d6)

2-CH3-Ph-k1k/101  
2-CH3-Ph-k1k

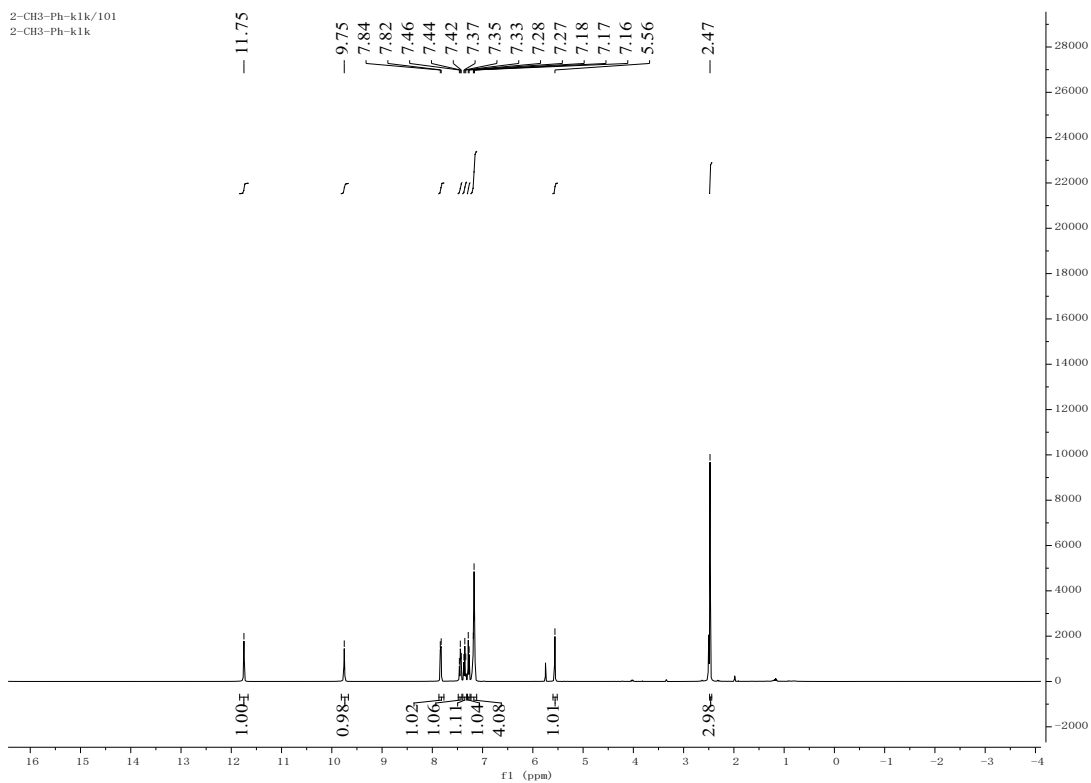

### <sup>13</sup>C NMR (101 MHz, DMSO-d<sub>6</sub>)

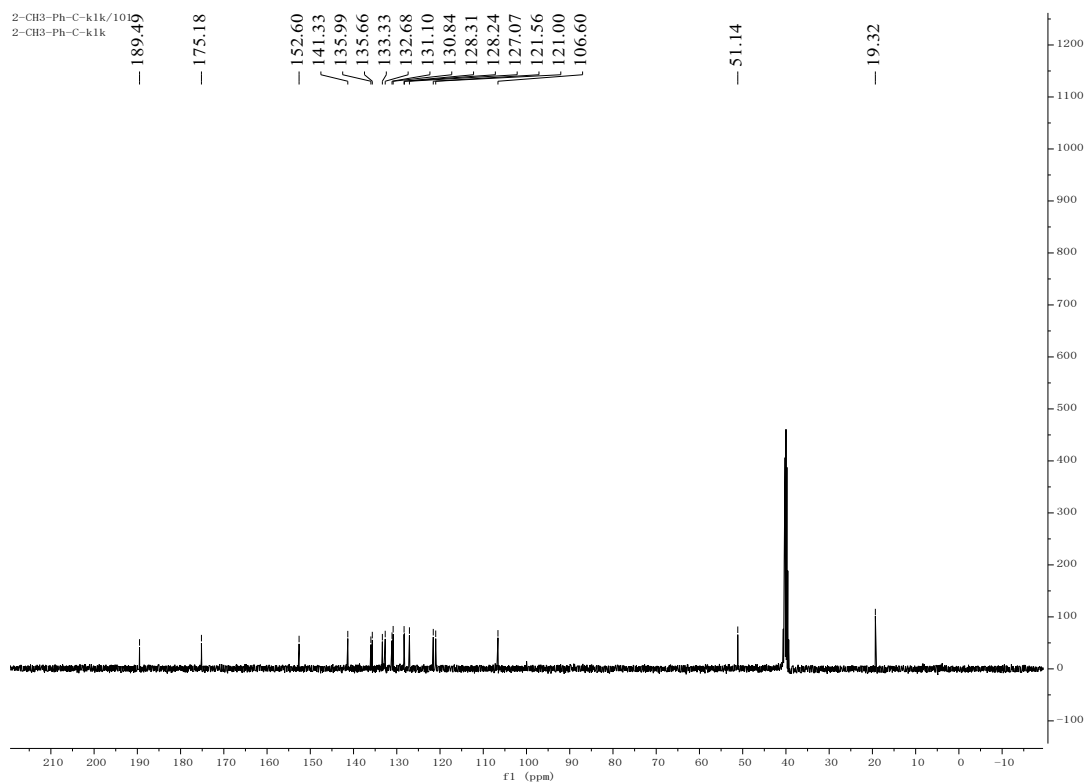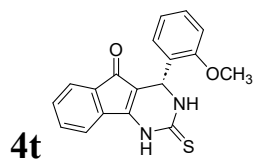

### <sup>1</sup>H NMR (400 MHz, DMSO-d<sub>6</sub>)

2-OCH3-Ph-k1k/101  
2-OCH3-Ph-k1k

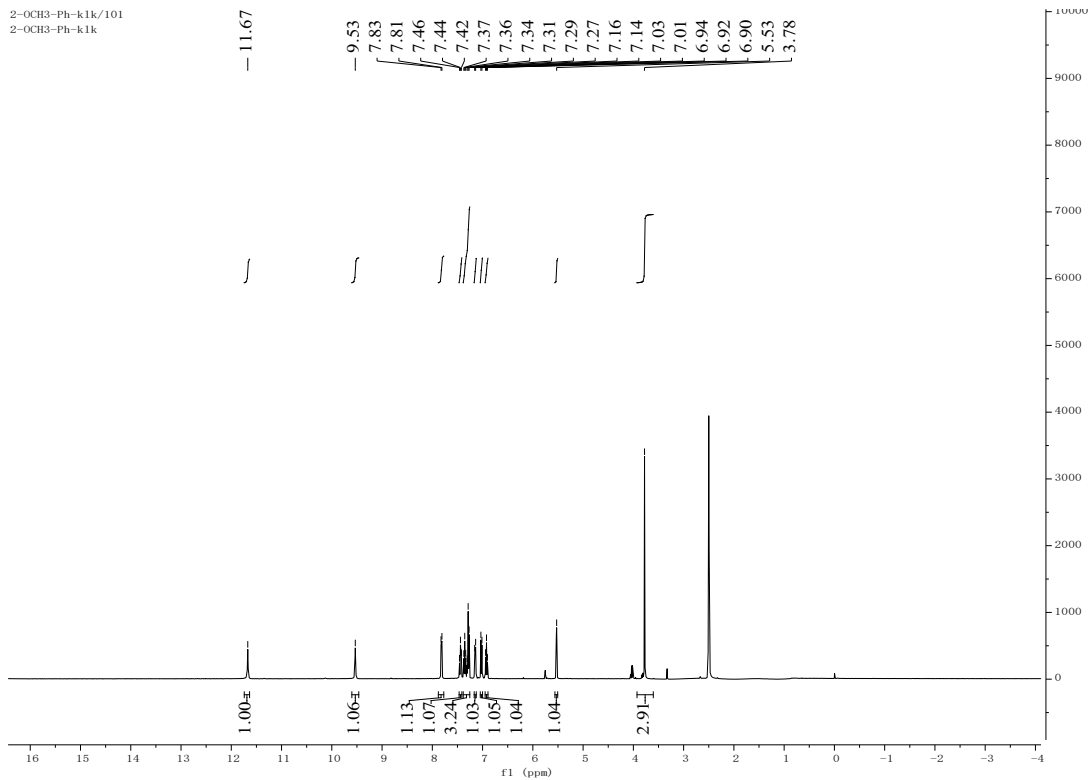

**<sup>13</sup>C NMR (101 MHz, DMSO-d6)**

2-OCH3-Ph-C-k1k/101  
2-OCH3-Ph-C-k1k

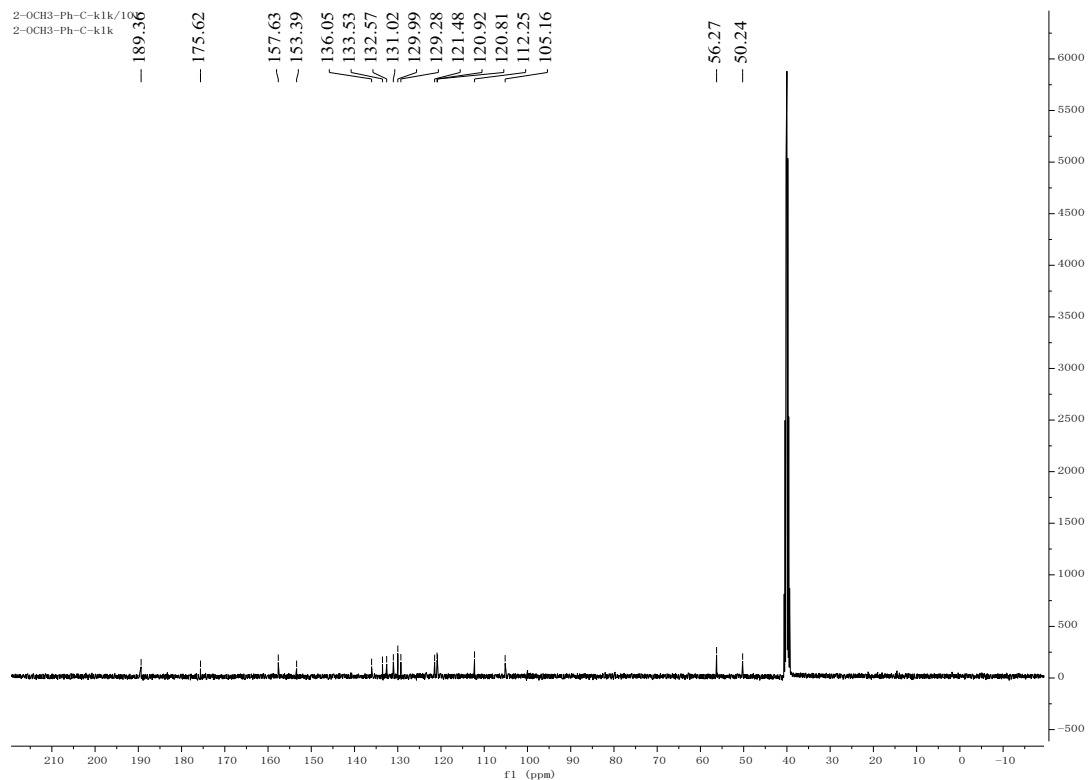

Supplement: d4nj03039g1.pdf [file d4nj03039g1.pdf]
